# Supplementary material for: Efficient unified synthesis of diverse bridged polycyclic scaffolds using a complexity-generating ‘stitching’ annulation approach
Source: Royal Society of Chemistry journal article supplement (doi:10.1039/d0cc06975b), 2020-12-21
Supplement: d0cc06975b1.pdf [file d0cc06975b1.pdf]

# **Efficient unified synthesis of diverse bridged polycyclic scaffolds using a complexity-generating ‘stitching’ annulation approach**

Scott Rice, Daniel J. Cox, Stephen P. Marsden\* and Adam Nelson\*

## **Supporting Information**

### **Contents**

|                                       |    |
|---------------------------------------|----|
| General Experimental                  | 1  |
| General Procedures                    | 2  |
| Synthesis of Scaffolds                | 4  |
| Scaffold and Virtual Library Analysis | 44 |
| NMR Spectra                           | 51 |
| References                            | 99 |

## General Experimental

Commercially available starting materials were obtained from Sigma–Aldrich, Fluorochem and Alfa Aesar. All non-aqueous reactions were performed under nitrogen atmosphere unless otherwise stated. Water-sensitive reactions were performed in anhydrous solvents in oven-dried glassware cooled under nitrogen before use. Anhydrous dichloromethane (DCM), anhydrous tetrahydrofuran (THF), anhydrous toluene, anhydrous ethanol, anhydrous methanol and anhydrous acetonitrile were obtained from a PureSolv MD5 Purification System. Anhydrous dimethylformamide (DMF) was obtained from SureSeal bottles from Sigma-Aldrich. All other solvents used were of chromatography or analytical grade. An IKA RV 10 rotary evaporator was used to remove the solvents under reduced pressure. Thin layer chromatography (TLC) was performed using aluminium backed silica (Merck silica gel 60 F254) plates obtained from Merck. Ultraviolet lamp ( $\lambda_{\max} = 254$  nm) and  $\text{KMnO}_4$  were used for visualization. Flash column chromatography was performed using silica gel 60 (35-70  $\mu\text{m}$  particles) supplied by Merck. Analytical LC-MS was performed using an Ultimate3000 HPLC instrument with a UV diode array detector and an MS detector Bruker Amazon Speeds with electrospray ionisation run positive and negative switching mode. The system used a Phenomenex Kinetex C18 2.1  $\times$  50 mm 2.6 micron column and two solvent systems: MeCN/ $\text{H}_2\text{O}$  + 0.1% Formic acid or MeCN/ $\text{H}_2\text{O}$ . A Bruker MaXis Impact spectrometer with electrospray (ES) ionisation source was used for high-resolution mass spectrometry (HRMS). A Bruker Alpha-P ATR FR-IR spectrometer was used to analyse the infrared spectra. Proton ( $^1\text{H}$ ), carbon ( $^{13}\text{C}$ ) and fluorine ( $^{19}\text{F}$ ) NMR data was collected on a Bruker 500 MHz spectrometer. Data was collected at 300 K unless otherwise stated. Chemical shifts ( $\delta$ ) are given in parts per million (ppm) and they are referenced to the residual solvent peak. Coupling constants ( $J$ ) are reported in Hertz (Hz) and splitting patterns are reported in an abbreviated manner: app. (apparent), s (singlet), d (doublet), t (triplet), q (quartet), m (multiplet), br (broad). Assignments were made using COSY, DEPT, HSQC, HMBC and NOESY experiments.

## General Procedures

TDG = 2-hydroxynicotinaldehyde (CAS 36404-89-4)

TDG2 = 2-chloro-6-hydroxybenzaldehyde (CAS 18362-30-6)

L1 = 2-hydroxy-5-trifluoromethylpyridine (CAS 33252-63-0)

### General Procedure A

Pd(OAc)<sub>2</sub> (5 mol%), 2-hydroxynicotinaldehyde (10 mol%), aryl iodide (2.00 eq) and AgTFA (2.00 eq) were added to HFIP–AcOH 19:1 (0.25 M). Then amine derivative (1.00 eq) and H<sub>2</sub>O (10.0 eq) were added and the reaction mixture allowed to stir at rt for 10 mins. The reaction mixture was then stirred at 120 °C for 24 h. The dark brown suspension was allowed to cool to rt and filtered through celite, with the celite being subsequently washed with THF (3 x (3 ml per mmol of amine derivative)). The filtrate was concentrated under reduced pressure and the resulting residue was dissolved in THF (0.25 M). 1M HCl (4 ml per mmol of amine derivative) was added and the light brown suspension was left to stir for 1 h at rt. The mixture was basified with 2M NaOH and Boc<sub>2</sub>O (3.00 eq) was added with the reaction mixture then being left to stir for 4 h at rt. EtOAc (10 ml per mmol of amine derivative) was added and the layers were separated. The organic layer was passed through a plug of silica, then the aqueous layer was extracted with EtOAc (3 x (4 ml per mmol of amine derivative)). The organic layers were then combined, dried (MgSO<sub>4</sub>), filtered and concentrated under reduced pressure to give a crude material.

### General procedure B

Pd(OAc)<sub>2</sub> (5 mol%), 2-hydroxynicotinaldehyde (10 mol%), aryl iodide (2.00 eq) and AgTFA (2.00 eq) were added to HFIP–AcOH 19:1 (0.50 M). Then amine derivative (1.00 eq) and H<sub>2</sub>O (10.0 eq) were added and the reaction mixture allowed to stir at rt for 10 mins. The reaction mixture was then stirred at 120 °C for 24 h. The dark brown suspension was allowed to cool to rt and filtered through celite, with the celite being subsequently washed with THF (3 x (3 ml per mmol of amine derivative)). The filtrate was concentrated under reduced pressure and the resulting residue was dissolved in THF (0.25 M). 1M HCl (4 ml per mmol of amine derivative) was added and the light brown suspension was left to stir for 1 h at rt. The mixture was basified with 2M NaOH and Ac<sub>2</sub>O (3.00 eq) was added with the reaction mixture then being left to stir

for 4 h at rt. EtOAc (10 ml per mmol of amine derivative) was added and the layers were separated. The organic layer was passed through a plug of silica, then the aqueous layer was extracted with EtOAc (3 x (4 ml per mmol of amine derivative)). The organic layers were then combined, dried ( $\text{MgSO}_4$ ), filtered and concentrated under reduced pressure to give a crude material.

### **General procedure C**

Picolinic acid (1.10 eq) was dissolved in DMF (0.40 M) and CDI (1.10 eq) was subsequently added portionwise. The mixture was then allowed to stir at rt for 90 mins. Amine derivative (1.00 eq) was added and the mixture stirred at rt for a further 16 h. Water (1 ml per mmol of amine derivative) was added followed by 5M NaOH solution (2 ml per mmol of amine derivative). The mixture was then extracted with DCM (3 x (2 ml per mmol of amine derivative)), organic layers combined, washed with water (5 x (2 ml per mmol of amine derivative)), dried ( $\text{MgSO}_4$ ), filtered and concentrated under reduced pressure to give a crude material.

### **General procedure D**

Picolinamide derivative (1.00 eq) was added to a pressure vial covered with aluminium foil at rt. Then  $\text{Ag}_2\text{CO}_3$  (1.10 eq), 2,6-dimethylbenzoic acid (0.25 eq),  $\text{Pd}(\text{OAc})_2$  (10 mol%), aryl iodide (6.00 eq) and DMF (0.27 M) were added sequentially. The vial was then flushed with nitrogen, sealed with a screw-cap and heated to 120 °C for 24 h. Upon cooling to rt, the reaction mixture was filtered through a pad of Celite, eluting with DCM. The filtrate was then concentrated under reduced pressure to give a crude material.

### **General procedure E**

A tube was charged with picolinamide derivative (1.00 eq),  $\text{CuBr}_2$  (10 mol%),  $\text{Pd}(\text{OAc})_2$  (5 mol%),  $\text{CsOAc}$  (4.00 eq),  $\text{tAmOH}$  (1.00 M) and aryl iodide (4.00 eq). The tube was sealed and heated at 140 °C for 24 h. The reaction mixture was allowed to cool to rt, filtered through celite (eluting with EtOAc) then the filtrate was concentrated under reduced pressure to give a crude material.

## General procedure F

To a pressure vial was added picolinamide derivative (1.00 eq), PivOH (0.30 eq), Pd(OAc)<sub>2</sub> (5 mol%), K<sub>2</sub>CO<sub>3</sub> (2.00 eq), aryl iodide (1.10 eq) and toluene (0.60 M). The mixture was stirred at 130 °C for 18 h. The reaction mixture was cooled to rt then filtered through celite, eluting with EtOAc and MeOH. The filtrate was concentrated under reduced pressure to give a crude material.

## Synthesis of scaffolds

### (1*R*\*,3*aR*\*,4*R*\*,10*bS*\*)-2,3,3*a*,4,5,10*b*-hexahydro-1,4-methanobenzo[*c*]cyclopenta[*e*]azepin-6(1*H*)-one (7)

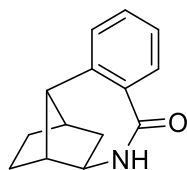

Pd(OAc)<sub>2</sub> (51.0 mg, 5 mol%), 2-hydroxynicotinaldehyde (55.0 mg, 10 mol%), methyl-2-iodobenzoate (1.32 ml, 9.00 mmol) and AgTFA (1.99 g, 9.00 mmol) were added to HFIP–AcOH 19:1 (10 ml). Then *exo*-2-aminonorbornane (0.50 g, 4.50 mmol) and H<sub>2</sub>O (0.90 ml) were added sequentially and the reaction mixture allowed to stir at rt for 10 mins. The reaction mixture was then stirred at 120 °C for 24 h. The dark brown suspension was allowed to cool to rt and filtered through celite, with the celite being washed with THF (3 x 15 ml). The filtrate was concentrated under reduced pressure and the resulting residue was dissolved in THF (20 ml). 1M HCl (20 ml) was added and the light brown suspension was left to stir for 1 h at rt. The mixture was basified with 2M NaOH and left to stir for 18 h at rt. EtOAc (50 ml) was added and the layers were separated. The organic layer was passed through a plug of silica, then the aqueous layer was extracted with EtOAc (3 x 20 ml). The organic layers were combined, dried (MgSO<sub>4</sub>), filtered and concentrated under reduced pressure to give a crude material. This was then purified *via* column chromatography, eluting EtOAc–hexane 35:65 to give *lactam derivative 7* (0.58 g, 60%) as a white solid. *R*<sub>f</sub> 0.21 (EtOAc–hexane 30:70).

$\nu_{\max}/\text{cm}^{-1}$ : 3170, 3055, 2947, 2870, 1639, 1445, 1343, 1251, 1131;  $\delta_{\text{H}}$  (500 MHz,  $\text{CDCl}_3$ ): 8.35 (1H, br. d,  $J$  7.2 Hz, NH), 8.30 (1H, d,  $J$  8.0 Hz, 7-H), 7.35 (1H, td,  $J$  7.8 and 1.2 Hz, 9-H), 7.27-7.21 (2H, m, 8-H and 10-H), 3.30-3.24 (1H, m, 4-H), 2.98 (1H, app. s, 10b-H), 2.37 (1H, d,  $J$  3.9 Hz, 3a-H), 2.32 (1H, br. t,  $J$  4.0 Hz, 1-H), 1.81-1.61 (4H, m, 11-H<sub>2</sub> and 2-H<sub>2</sub>), 1.37-1.30 (1H, m, 3-H<sub>A</sub>), 1.22-1.14 (1H, m, 3-H<sub>B</sub>);  $\delta_{\text{C}}$  (125 MHz,  $\text{CDCl}_3$ ): 169.2 (C-6), 141.0 (C-10a), 132.0 (C-7), 131.6 (C-6a), 131.1 (C<sub>2</sub>-9,10), 125.9 (C-8), 57.4 (C-10b), 54.7 (C-4), 48.1 (C-1), 43.1 (C-3a), 38.0 (C-11), 27.7 (C-2), 27.4 (C-3); HRMS found  $\text{MNa}^+$  236.1050.  $\text{C}_{14}\text{H}_{15}\text{NO}$  requires  $\text{MNa}$ , 236.1046.

**(6*R*\*,6*aR*\*,9*R*\*,9*aS*\*)-6,6*a*,7,8,9,9*a*-hexahydro-5*H*-6,9-methanocyclopenta[*c*][1,8]naphthyridine (8)**

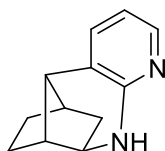

$\text{Pd}(\text{OAc})_2$  (51.0 mg, 5 mol%), TDG2 (70.0 mg, 10 mol%), L1 (183 mg, 25 mol%), 2-fluoro-3-iodopyridine (2.00 g, 9.00 mmol) and  $\text{AgTFA}$  (2.00 g, 9.00 mmol) were dissolved in HFIP (10 ml) at rt. Then *exo*-2-aminonorbornane (0.50 g, 4.50 mmol) and  $\text{H}_2\text{O}$  (0.90 ml) were added and the resulting mixture allowed to stir at rt for 10 mins. Then the mixture has stirred at 120 °C for 24 h.  $\text{AcOH}$  (1 ml) was added and the reaction mixture left to stir for a further 24 h at 120 °C. The mixture was cooled to rt, filtered through celite (washed with  $\text{MeOH}-\text{CHCl}_3$  1:4) and the filtrate concentrated under reduced pressure to give a crude material. This was then purified *via* column chromatography, eluting  $\text{EtOAc}$  to give the fused-ring pyridine derivative **8**<sup>1</sup> (0.55 g, 65%) as a light brown oil.  $R_f$  0.19 ( $\text{EtOAc}$ ).  $\delta_{\text{H}}$  (500 MHz,  $\text{CDCl}_3$ ): 7.49 (1H, dd,  $J$  6.4 and 1.4 Hz, 3-H), 7.42 (1H, dd,  $J$  7.1 and 1.4 Hz, 1-H), 6.54 (1H, app. t,  $J$  6.7 Hz, 2-H), 3.65 (1H, app. d,  $J$  6.2 Hz, 6-H), 2.71 (1H, br. t,  $J$  4.1 Hz, 9a-H), 2.65 (1H, br. t,  $J$  1.2 Hz, 6a-H), 2.19 (1H, app. d,  $J$  5.0 Hz, 9-H), 1.94-1.86 (1H, m, 8-H<sub>A</sub>), 1.86-1.80 (1H, m, 10-H<sub>A</sub>), 1.69-1.59 (2H, m, 10-H<sub>B</sub> and 7-H<sub>A</sub>), 1.42 (1H, ddd,  $J$  13.4, 9.1 and 6.3 Hz, 8-H<sub>B</sub>), 1.28-1.24 (1H, m, 7-H<sub>B</sub>);  $\delta_{\text{C}}$  (125 MHz,  $\text{CDCl}_3$ ): 152.7 (C-4a), 139.4 (C-1), 133.8 (C-3), 126.3 (C-9b), 110.9 (C-2), 54.5

(C-6), 49.2 (C-6a), 48.5 (C-9a), 40.0 (C-10), 36.6 (C-9), 29.9 (C-7), 23.4 (C-8). All data is consistent with known literature values.<sup>1</sup>

***N*-[(1*R*\*,2*R*\*,4*R*\*,7*R*\*)-7-(3-methoxyphenyl)bicyclo[2.2.1]heptan-2-yl]acetamide (**9**)**

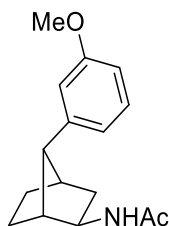

Prepared according to General procedure B, *exo*-2-aminonorbornane (0.50 g, 4.50 mmol) and 3-iodoanisole (1.07 ml, 9.00 mmol) gave a crude material. This was then purified *via* column chromatography, eluting EtOAc–hexane 50:50 to give *arylated derivative 9* (0.81 g, 70%, *dr* >95:<5 by <sup>1</sup>H NMR) as an off-white solid. *R*<sub>f</sub> 0.14 (EtOAc–hexane 50:50).  $\nu_{\text{max}}/\text{cm}^{-1}$ : 3271, 2961, 2897, 2870, 1637, 1555, 1433, 1294, 1044;  $\delta_{\text{H}}$  (500 MHz, CDCl<sub>3</sub>): 7.22 (1H, t, *J* 7.9 Hz, phenyl 5-H), 6.88 (1H, app. d, *J* 7.6 Hz, phenyl 6-H), 6.84–6.82 (1H, m, phenyl 2-H), 6.73 (1H, dd, *J* 8.2 and 2.6 Hz, phenyl 4-H), 4.56 (1H, br. d, *J* 7.2 Hz, NH), 3.83 (1H, td, *J* 8.5 and 4.0 Hz, 2-H), 3.77 (3H, s, OMe), 2.95 (1H, app. s, 7-H), 2.70 (1H, t, *J* 4.0 Hz, 4-H), 2.66 (1H, d, *J* 4.4 Hz, 1-H), 1.85 (1H, dd, *J* 13.4 and 8.5 Hz, 3-H<sub>A</sub>), 1.75 (1H, tt, *J* 11.7 and 4.4 Hz, 6-H<sub>A</sub>), 1.70–1.61 (1H, m, 5-H<sub>A</sub>), 1.55–1.46 (4H, m, 3-H<sub>B</sub> and acetyl), 1.40–1.34 (1H, m, 6-H<sub>B</sub>), 1.29–1.22 (1H, m, 5-H<sub>B</sub>);  $\delta_{\text{C}}$  (125 MHz, CDCl<sub>3</sub>): 168.6 (acetyl C=O), 159.8 (phenyl C-3), 142.3 (phenyl C-1), 129.5 (phenyl C-5), 120.7 (phenyl C-6), 114.3 (phenyl C-2), 111.2 (phenyl C-4), 55.2 (OMe), 53.2 (C-2), 52.8 (C-7), 46.7 (C-1), 37.9 (C-3), 37.6 (C-4), 28.6 (C-5), 27.8 (C-6), 23.3 (acetyl CH<sub>3</sub>); HRMS found MH<sup>+</sup> 260.1644. C<sub>16</sub>H<sub>21</sub>NO<sub>2</sub> requires *MH*, 260.1645.

***tert*-butyl *N*-[(1*R*\*,2*R*\*,4*R*\*,7*R*\*)-7-[2-(hydroxymethyl)phenyl]bicyclo[2.2.1]heptan-2-yl]carbamate (**10**)**

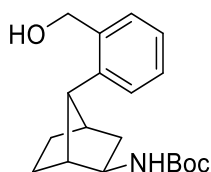

Prepared according to General procedure A, *exo*-2-aminonorbornane (0.50 g, 4.50 mmol) and 2-iodobenzyl alcohol (2.10 g, 9.00 mmol) gave a crude material. This was then purified *via* column chromatography, eluting EtOAc–hexane 25:75 to give *arylated derivative 10* (0.42 g, 30%, *dr* >95:<5 by  $^1\text{H}$  NMR) as a white solid.  $R_f$  0.36 (EtOAc–hexane 30:70).  $\nu_{\text{max}}/\text{cm}^{-1}$ : 3485, 3433, 2962, 2869, 1693, 1504, 1451, 1346, 1275, 1007;  $\delta_{\text{H}}$  (500 MHz,  $\text{CDCl}_3$ ): 7.46 (1H, app br. d,  $J$  4.1 Hz, phenyl 6-H), 7.27-7.18 (3H, m, phenyl 3-H, phenyl 4-H and phenyl 5-H), 4.75-4.64 (2H, m, hydroxymethyl 1- $\text{H}_2$ ), 3.57-3.46 (2H, m, 2-H and NH), 2.94 (1H, app. s, 7-H), 2.72-2.62 (3H, m, 1-H, 4-H and OH), 1.87 (1H, dd,  $J$  13.7 and 8.0 Hz, 3- $\text{H}_A$ ), 1.82-1.72 (2H, m, 3- $\text{H}_B$  and 6- $\text{H}_A$ ), 1.69-1.61 (1H, m, 5- $\text{H}_A$ ), 1.39-1.18 (11H, m, 5- $\text{H}_B$ , 6- $\text{H}_B$  and  $^t\text{Bu}$ );  $\delta_{\text{C}}$  (125 MHz,  $\text{CDCl}_3$ ): 155.2 (Boc C=O), 140.1 (phenyl C-2), 138.0 (phenyl C-1), 128.4 (phenyl C-6), 127.6 (phenyl C-5), 127.4 (phenyl C-3), 126.6 (phenyl C-4), 78.7 ( $^t\text{Bu}$  C<sub>1</sub>), 62.5 (hydroxymethyl C-1), 54.9 (C-2), 50.9 (C-7), 47.0 (C-1), 38.3 (C-4), 38.2 (C-3), 28.6 (C-5), 28.3 ( $^t\text{Bu}$  C<sub>3</sub>), 27.6 (C-6); HRMS found  $\text{MNa}^+$  340.1885.  $\text{C}_{19}\text{H}_{27}\text{NO}_3$  requires  $\text{MNa}$ , 340.1883.

**(3*R*\*,4*aR*\*,10*bS*\*)-9-methoxy-6-methyl-2,3,4,4*a*-tetrahydro-1*H*-3,10*b*-methanophenanthridine (S1)**

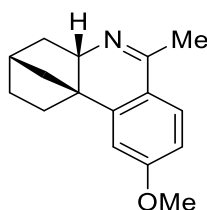

Arylated derivative **9** (100 mg, 0.39 mmol) was dissolved in MeCN (5 ml) at rt.  $\text{POCl}_3$  (0.28 ml, 3.09 mmol) was added to the solution dropwise over 5 mins. The resulting solution was then stirred and heated at 100 °C for 4 h. The reaction mixture was allowed to cool to rt and the volatiles removed under reduced pressure. DCM (20 ml) and water (20 ml) were added to the residue and this solution was then basified to pH 12 with 2M NaOH. This was then extracted



with DCM (4 x 20 ml), organic layers combined, dried (MgSO<sub>4</sub>), filtered and concentrated under reduced pressure to give a crude material. This was then purified *via* column chromatography, eluting DCM–MeOH 95:5 to give the *cyclised imine derivative S1* (31.0 mg, 33%, *dr* >95:<5 by <sup>1</sup>H NMR) as a colourless oil. *R*<sub>f</sub> 0.15 (DCM–MeOH 95:5). δ<sub>H</sub> (500 MHz, CDCl<sub>3</sub>): 7.57 (1H, d, *J* 8.6 Hz, 7-H), 7.05 (1H, d, *J* 2.4 Hz, 10-H), 6.80 (1H, dd, *J* 8.6 and 2.4 Hz, 8-H), 3.86 (3H, s, OMe), 3.46 (1H, app. br. s, 4a-H), 2.45 (3H, s, methyl), 2.33 (1H, app. br. t, *J* 3.9 Hz, 3-H), 2.26 (1H, td, *J* 12.3 and 4.1 Hz, 1-H<sub>A</sub>), 2.21-2.14 (1H, m, 4-H<sub>A</sub>), 2.09-2.03 (1H, m, 4-H<sub>B</sub>), 1.83-1.75 (1H, m, 2-H<sub>A</sub>), 1.58 (1H, app. d, *J* 9.5 Hz, 11-H<sub>A</sub>), 1.40-1.33 (1H, m, 2-H<sub>B</sub>), 1.30-1.24 (1H, m, 1-H<sub>B</sub>), 1.22 (1H, app. d, *J* 9.5 Hz, 11-H<sub>B</sub>); δ<sub>C</sub> (125 MHz, CDCl<sub>3</sub>): 162.4 (C-9), 161.3 (C-6), 142.8 (C-10a), 129.1 (C-6a), 121.2 (C-7), 111.3 (C-8), 111.0 (C-10), 62.6 (C-4a), 55.6 (OMe), 46.3 (C-10b), 44.2 (C-11), 41.7 (C-4), 35.6 (C-3), 31.7 (C-1), 29.4 (C-2), 23.0 (methyl CH<sub>3</sub>); HRMS found MH<sup>+</sup> 242.1557. C<sub>16</sub>H<sub>19</sub>NO requires *MH*, 242.1539.

**(3*R*\*,4*aR*\*,6*S*\*,10*bS*\*)-9-methoxy-6-methyl-2,3,4,4*a*,5,6-hexahydro-1*H*-3,10*b*-methanophenanthridine (5)**

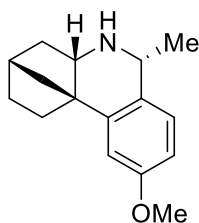

Cyclised imine derivative **S1** (30.0 mg, 0.12 mmol) was dissolved in MeOH (2 ml) and NaBH<sub>4</sub> (9.00 mg, 0.24 mmol) was added at rt. The reaction mixture was left to stir at rt for 18 h. 1M HCl (5 ml) was added to quench the reaction and 2M NaOH to basify the reaction mixture to pH 12. This solution was subsequently extracted with DCM (4 x 10 ml), organic layers combined, dried (MgSO<sub>4</sub>), filtered and concentrated under reduced pressure to give the *amine derivative 5* (21.0 mg, 74%, *dr* >95:<5 by <sup>1</sup>H NMR) as a colourless oil. *R*<sub>f</sub> 0.63 (DCM–MeOH 80:20). δ<sub>H</sub> (500 MHz, CDCl<sub>3</sub>): 7.13 (1H, d, *J* 8.6 Hz, 7-H), 6.90 (1H, d, *J* 2.7 Hz, 10-H), 6.71 (1H, dd, *J* 8.6 and 2.7 Hz, 8-H), 3.99 (1H, q, *J* 6.6 Hz, 6-H), 3.80 (3H, s, OMe), 2.91 (1H, dd, *J* 7.8 and 4.0 Hz, 4a-H), 2.29 (1H, app. br. t, *J* 4.0 Hz, 3-H), 2.01-1.88 (2H, m, 4-H<sub>A</sub> and 1-

H<sub>A</sub>), 1.86-1.78 (1H, m, 2-H<sub>A</sub>), 1.63 (1H, dd, *J* 10.0 and 1.6 Hz, 11-H<sub>A</sub>), 1.52 (1H, dd, *J* 10.0 and 1.6 Hz, 11-H<sub>B</sub>), 1.45 (3H, d, *J* 6.6 Hz, methyl), 1.41-1.24 (4H, m, 4-H<sub>B</sub>, 1-H<sub>B</sub>, 2-H<sub>B</sub> and NH);  $\delta_C$  (125 MHz, CDCl<sub>3</sub>): 158.1 (C-9), 140.6 (C-10a), 134.1 (C-6a), 125.9 (C-7), 112.6 (C-10), 111.3 (C-8), 60.8 (C-4a), 55.4 (OMe), 52.4 (C-6), 48.9 (C-10b), 44.8 (C-11), 40.8 (C-4), 36.8 (C-3), 35.2 (C-1), 30.3 (C-2), 21.8 (methyl CH<sub>3</sub>); HRMS found MH<sup>+</sup> 244.1708. C<sub>16</sub>H<sub>21</sub>NO requires *MH*, 244.1696. The relative configuration was determined from nOe interaction observed between 4a-H and 6-H.

***N*-[(1*R*\*,2*R*\*,4*R*\*,7*R*\*)-7-(2-bromo-5-methoxyphenyl)bicyclo[2.2.1]heptan-2-yl]acetamide (**S2**)**

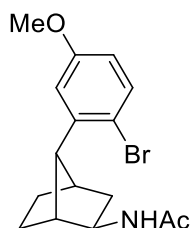

Arylated derivative **9** (100 mg, 0.39 mmol) was dissolved in MeCN (5 ml) at rt. Then NBS (76.0 mg, 0.43 mmol) was added at rt. The resulting solution was stirred at rt for 18 h and then concentrated under reduced pressure to give a crude material. This was then purified *via* column chromatography, eluting EtOAc–hexane 50:50 to give the *brominated derivative S2* (118 mg, 89%) as a white powder. *R*<sub>f</sub> 0.20 (EtOAc–hexane 50:50).  $\nu_{\max}/\text{cm}^{-1}$ : 3303, 2952, 2906, 2868, 1639, 1533, 1463, 1287, 1175;  $\delta_H$  (500 MHz, CDCl<sub>3</sub>): 7.46 (1H, d, *J* 8.7 Hz, phenyl 3-H), 6.90 (1H, d, *J* 2.5 Hz, phenyl 6-H), 6.64 (1H, dd, *J* 8.7 and 2.5 Hz, phenyl 4-H), 4.48 (1H, br. d, *J* 5.4 Hz, NH), 3.82 (1H, td, *J* 8.1 and 2.9 Hz, 2-H), 3.77 (3H, s, OMe), 3.08 (1H, d, *J* 4.3 Hz, 1-H), 2.88 (1H, app. s, 7-H), 2.64 (1H, br. t, *J* 3.9 Hz, 4-H), 1.99-1.91 (1H, m, 3-H<sub>A</sub>), 1.89-1.80 (2H, m, 3-H<sub>B</sub> and 6-H<sub>A</sub>), 1.72-1.64 (1H, m, 5-H<sub>A</sub>), 1.48 (3H, s, acetyl), 1.41-1.32 (1H, m, 6-H<sub>B</sub>), 1.30-1.22 (1H, m, 5-H<sub>B</sub>);  $\delta_C$  (125 MHz, CDCl<sub>3</sub>): 168.7 (acetyl C=O), 158.9 (phenyl C-5), 141.4 (phenyl C-1), 134.2 (phenyl C-3), 116.2 (phenyl C-6), 115.8 (phenyl C-2), 112.5 (phenyl C-4), 55.6 (OMe), 54.1 (C-7), 53.3 (C-2), 46.4 (C-1), 38.8 (C-3), 38.2 (C-4), 28.9 (C-5), 27.4 (C-6), 23.2 (acetyl CH<sub>3</sub>); HRMS found MH<sup>+</sup> 338.0748. C<sub>16</sub>H<sub>20</sub>BrNO<sub>2</sub> requires *MH*, 338.0750.

**1-[(1*R*\*,3*aR*\*,4*R*\*,9*bS*\*)-8-methoxy-1,2,3,3*a*,4,9*b*-hexahydro-5*H*-1,4-methanocyclopenta[*c*]quinoline-5-yl]ethanone (S3)**

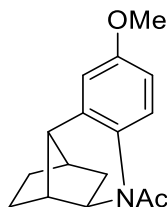

Brominated derivative **S2** (110 mg, 0.33 mmol) was dissolved in toluene (10 ml) and Pd(OAc)<sub>2</sub> (3.71 mg, 5 mol%), *rac*-BINAP (15.0 mg, 7.5 mol%) and Cs<sub>2</sub>CO<sub>3</sub> (215 mg, 0.66 mmol) were added sequentially at rt. The reaction mixture was then stirred at 100 °C for 24 h. The reaction mixture was allowed to cool to rt and concentrated under reduced pressure to give a crude material. This was then purified *via* column chromatography, eluting EtOAc–hexane 20:80→50:50 to give *cyclised acetamide derivative S3* (71.0 mg, 85%, *rotamers* 60:40 by <sup>1</sup>H NMR) as a white solid. *R*<sub>f</sub> 0.54 (EtOAc–hexane 50:50). δ<sub>H</sub> (500 MHz, CDCl<sub>3</sub>, broad peaks due to unresolved rotamers); 8.10 (1H, app. br. s, 6-H<sup>maj</sup>), 6.95 (1H, app. br. s, 6-H<sup>min</sup>), 6.71 (2H, app. d, *J* 8.8 Hz, 7-H), 6.65 (2H, app. br. s, 9-H), 5.11 (1H, app. br. s, 4-H<sup>min</sup>), 4.19-4.01 (1H, m, 4-H<sup>maj</sup>), 3.77 (6H, s, OMe), 2.71 (2H, app. s, 9*b*-H), 2.44-2.34 (2H, m, 3*a*-H), 2.28 (6H, s, acetyl), 2.19 (2H, app. br. s, 1-H), 1.84 (2H, app. br. s, 2-H<sub>A</sub>), 1.62 (4H, app. br. s, 10-H<sub>A</sub> and 3-H<sub>A</sub>), 1.49 (2H, app. br. s, 3-H<sub>B</sub>), 1.32 (2H, app. br. s, 2-H<sub>B</sub>), 1.31-1.20 (2H, m, 10-H<sub>B</sub>); δ<sub>C</sub> (125 MHz, CDCl<sub>3</sub>): 169.7 (acetyl C=O<sup>min</sup>), 168.5 (acetyl C=O<sup>maj</sup>), 156.3 (C-8<sup>min</sup>), 155.7 (C-8<sup>maj</sup>), 134.3 (C-9*a*<sup>min</sup>), 132.4 (C-9*a*<sup>maj</sup>), 130.2 (C-5*a*<sup>min</sup>), 129.4 (C-5*a*<sup>maj</sup>), 124.8 (C-6<sup>maj</sup>), 124.4 (C-6<sup>min</sup>), 113.9 (C-9), 111.5 (C-7), 60.5 (C-4<sup>maj</sup>), 59.7 (C-4<sup>min</sup>), 55.5 (OMe), 50.8 (C-9*b*), 46.5 (C-3*a*), 40.1 (C-1<sup>min</sup>), 39.1 (C-1<sup>maj</sup>), 34.5 (C-3<sup>maj</sup>), 32.8 (C-3<sup>min</sup>), 29.2 (C-10), 25.1 (C-2), 24.5 (acetyl CH<sub>3</sub>); HRMS found MNa<sup>+</sup> 280.1312. C<sub>16</sub>H<sub>19</sub>NO<sub>2</sub> requires *MNa*, 280.1308.

**(1*R*\*,3*aR*\*,4*R*\*,9*bS*\*)-8-methoxy-1,2,3,3*a*,4,9*b*-hexahydro-5*H*-1,4-methanocyclopenta[*c*]quinoline (11)**

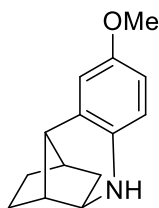

Cyclised acetamide derivative **S3** (70.0 mg, 0.27 mmol) was dissolved in EtOH–HCl 1:1 (10 ml) and stirred at 80 °C for 18 h. The reaction mixture was allowed to cool to rt and concentrated under reduced pressure to give the *aniline derivative* **II** (64.0 mg, 94%) as a white powder.  $R_f$  0.84 (DCM–MeOH 90:10).  $\nu_{\max}/\text{cm}^{-1}$ : 3483, 3434, 2961, 2868, 1504, 1446, 1268, 1034;  $\delta_{\text{H}}$  (500 MHz, MeOD); 7.19 (1H, d,  $J$  8.5 Hz, 6-H), 6.97–6.92 (2H, m, 7-H and 9-H), 3.94–3.91 (1H, m, 4-H), 3.83 (3H, s, OMe), 2.97 (1H, app. s, 9b-H), 2.53 (2H, app. d,  $J$  3.9 Hz, 3a-H and 1-H), 2.03–1.94 (1H, m, 2- $H_A$ ), 1.86–1.77 (1H, m, 3- $H_A$ ), 1.77–1.72 (2H, m, 10- $H_2$ ), 1.50–1.39 (2H, m, 2- $H_B$  and 3- $H_B$ );  $\delta_{\text{C}}$  (125 MHz, MeOD): 161.6 (C-8), 136.8 (C-9a), 125.3 (C-6), 120.2 (C-5a), 116.2 (C-9), 115.0 (C-7), 57.6 (C-4), 56.2 (OMe), 49.5 (C-9b), 46.7 (C-3a), 40.8 (C-1), 32.0 (C-10), 30.4 (C-3), 24.8 (C-2); HRMS found  $\text{MH}^+$  216.1394.  $\text{C}_{14}\text{H}_{17}\text{NO}$  requires  $\text{MH}$ , 216.1383. The product was isolated as the corresponding HCl salt.

**(1*R*\*,3*aR*\*,4*R*\*,10*bS*\*)-1,2,3,3*a*,4,5,6,10*b*-octahydro-1,4-methanobenzo[*c*]cyclopenta[*e*]azepine (**12**)**

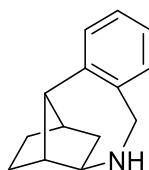

Arylated derivative **10** (310 mg, 0.98 mmol),  $\text{Et}_3\text{N}$  (0.27 ml, 1.96 mmol) and  $\text{MsCl}$  (0.09 ml, 1.17 mmol) were dissolved in DCM (10 ml) at 0 °C. The reaction mixture was then stirred at rt for 18 h. A saturated solution of  $\text{NaHCO}_3$  (10 ml) was added and the phases separated. The aqueous phase was extracted with DCM (3 x 10 ml), organic layers combined, dried ( $\text{MgSO}_4$ ), filtered and concentrated under reduced pressure to give the mesylate intermediate. This intermediate was then dissolved in DCM (10 ml) and TFA (3 ml) was added dropwise at rt and

the reaction mixture left to stir for 18 h at rt. The TFA and solvent were removed under reduced pressure to give a crude material. This was then purified *via* column chromatography, eluting EtOAc → MeOH–EtOAc 10:90 to give the *cyclised amine derivative 12* (279 mg, 91%) as a colourless hygroscopic solid.  $R_f$  0.08 (EtOAc).  $\nu_{\max}/\text{cm}^{-1}$ : 3400, 3254, 2976, 2884, 1669, 1513, 1472, 1398, 1179, 1132;  $\delta_{\text{H}}$  (500 MHz,  $\text{CDCl}_3$ ): 7.43 (1H, app. d,  $J$  7.3 Hz, 10-H), 7.34-7.27 (3H, m, 7-H, 8-H and 9-H), 4.80 (1H, d,  $J$  11.8 Hz, 6-H<sub>A</sub>), 4.62 (1H, d,  $J$  11.8 Hz, 6-H<sub>B</sub>), 3.28-3.22 (2H, m, 4-H and 10b-H), 2.98 (1H, d,  $J$  4.3 Hz, 3a-H), 2.84 (1H, br t.  $J$  4.1 Hz, 1-H), 2.19 (1H, dd,  $J$  14.7 and 2.8 Hz, 11-H<sub>A</sub>), 2.05-1.93 (2H, m, 11-H<sub>B</sub> and 3-H<sub>A</sub>), 1.81-1.71 (1H, m, 3-H<sub>B</sub>), 1.39-1.28 (2H, m, 2-H<sub>2</sub>);  $\delta_{\text{C}}$  (125 MHz,  $\text{CDCl}_3$ ): 162.4 (q,  $J$  35.2 Hz, TFA C=O), 137.4 (C-10a), 136.7 (C-6a), 132.4 (C-10), 129.9 (C-7), 128.6 (C-9), 128.1 (C-8), 116.5 (q,  $J$  290.7 Hz, TFA  $\text{CF}_3$ ), 55.6 (C-4), 50.4 (C-10b), 45.5 (C-3a), 44.2 (C-6), 38.7 (C-1), 35.8 (C-11), 28.3 (C-3), 27.7 (C-2); HRMS found  $\text{MH}^+$  200.1428.  $\text{C}_{14}\text{H}_{17}\text{N}$  required  $\text{MH}$ , 200.1434. The product was isolated as the corresponding TFA salt.

***tert*-butyl *N*-[(1*R*\*,3*S*\*)-3-(3-methoxyphenyl)cyclohexyl]carbamate (**13**)**

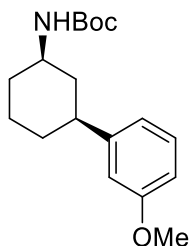

Prepared according to General procedure A, cyclohexylamine (0.50 g, 5.00 mmol) and 3-iodoanisole (1.17 g, 10.0 mmol) gave a crude material. This was then purified *via* column chromatography, eluting EtOAc–hexane 5:95 to give *arylated derivative 13* (1.43 g, 93%,  $dr >95:<5$  by  $^1\text{H}$  NMR) as a white solid.  $R_f$  0.48 (EtOAc–hexane 20:80).  $\nu_{\max}/\text{cm}^{-1}$ : 3345, 2975, 2929, 2855, 1687, 1584, 1494, 1390, 1266, 1241, 1159, 1049;  $\delta_{\text{H}}$  (500 MHz,  $\text{CDCl}_3$ ): 7.23-7.18 (1H, m, phenyl 5-H), 6.79 (1H, dt,  $J$  7.7 and 1.2 Hz, phenyl 4-H), 6.75-6.71 (2H, m, phenyl 2-H and phenyl 6-H), 4.43 (1H, br. s, NH), 3.79 (3H, s, OMe), 3.64-3.54 (1H, m, 1-H), 2.61 (1H, tt,  $J$  12.2 and 3.1 Hz, 3-H), 2.19 (1H, d,  $J$  12.2 Hz, 2-H<sub>A</sub>), 2.08-2.01 (1H, m, 6-H<sub>A</sub>), 1.93-1.80 (2H, m, 5-H<sub>A</sub> and 4-H<sub>A</sub>), 1.54-1.39 (10H, m, <sup>t</sup>Bu and 5-H<sub>B</sub>), 1.33 (1H, qd,  $J$  12.4 and 3.2 Hz, 4-H<sub>B</sub>), 1.22 (1H, app. q,  $J$  12.2 Hz, 2-H<sub>B</sub>), 1.09 (1H, qd,  $J$  12.4 and 3.4 Hz, 6-H<sub>B</sub>);  $\delta_{\text{C}}$  (125

MHz, CDCl<sub>3</sub>): 159.8 (phenyl C-3), 155.3 (Boc C=O), 148.2 (phenyl C-1), 129.4 (phenyl C-5), 119.3 (phenyl C-4), 112.9 (phenyl C-2), 111.4 (phenyl C-6), 79.3 (<sup>t</sup>Bu C<sub>1</sub>), 55.3 (OMe), 50.1 (C-1), 43.4 (C-3), 41.5 (C-2), 33.4 (C-6), 33.2 (C-4), 28.6 (<sup>t</sup>Bu C<sub>3</sub>), 25.3 (C-5); HRMS found MNa<sup>+</sup> 328.1876. C<sub>18</sub>H<sub>27</sub>NO<sub>3</sub> requires *MNa*, 328.1883.

***tert*-butyl *N*-[(1*R*\*,3*S*\*)-3-(2-bromo-5-methoxyphenyl)cyclohexyl]carbamate (**S4**)**

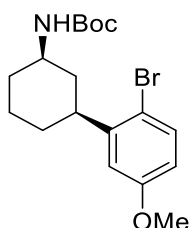

Arylated derivative **13** (100 mg, 0.33 mmol) was dissolved in MeCN (5 ml) then NBS (64.0 mg, 0.36 mmol) was added to the solution at rt. The resulting solution was stirred overnight for 18 h at rt. The solvent was then removed under reduced pressure to give a crude material. This was then purified *via* column chromatography, eluting EtOAc–hexane 5:95 to give the *brominated derivative S4* (101 mg, 79%) as a white solid. *R*<sub>f</sub> 0.50 (EtOAc–hexane 20:80). δ<sub>H</sub> (500 MHz, CDCl<sub>3</sub>): 7.40 (1H, d, *J* 8.7 Hz, phenyl 3-H), 6.75 (1H, d, *J* 3.0 Hz, phenyl 6-H), 6.60 (1H, dd, *J* 8.7 and 3.0 Hz, phenyl 4-H), 4.48 (1H, br. s, NH), 3.75 (3H, s, OMe), 3.66-3.50 (1H, m, 1-H), 3.02 (1H, tt, *J* 11.9 and 2.9 Hz, 3-H), 2.17 (1H, app. d, *J* 11.9 Hz, 2-H<sub>A</sub>), 2.06 (1H, app. d, *J* 11.9 Hz, 6-H<sub>A</sub>), 1.91-1.82 (2H, m, 4-H<sub>A</sub> and 5-H<sub>A</sub>), 1.51 (1H, qt, *J* 13.2 and 3.0 Hz, 5-H<sub>B</sub>), 1.43 (9H, s, <sup>t</sup>Bu), 1.28-1.14 (2H, m, 2-H<sub>B</sub> and 4-H<sub>B</sub>), 1.09 (1H, qd, *J* 12.7 and 3.6 Hz, 6-H<sub>B</sub>); δ<sub>C</sub> (125 MHz, CDCl<sub>3</sub>): 159.2 (phenyl C-5), 155.2 (Boc C=O), 145.8 (phenyl C-1), 133.4 (phenyl C-3), 114.9 (phenyl C-2), 113.7 (phenyl C-6), 112.6 (phenyl C-4), 79.2 (<sup>t</sup>Bu C<sub>1</sub>), 55.5 (OMe), 49.9 (C-1), 42.1 (C-3), 39.8 (C-2), 33.3 (C-6), 32.2 (C-4), 28.5 (<sup>t</sup>Bu C<sub>3</sub>), 25.1 (C-5); HRMS found MNa<sup>+</sup> 406.0984. C<sub>18</sub>H<sub>26</sub>BrNO<sub>3</sub> requires *MNa*, 406.0988.

***tert*-butyl (2*R*\*,6*S*\*)-8-methoxy-3,4,5,6-tetrahydro-2,6-methanobenzo[*b*]azocine-1(2*H*)-carboxylate (4)**

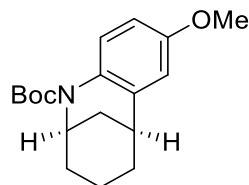

Brominated derivative **S4** (95.0 mg, 0.25 mmol), Pd(OAc)<sub>2</sub> (3.00 mg, 5 mol%) and *rac*-BINAP (12.0 mg, 7.5 mol%) were added to toluene (5 ml) and heated until all solids had dissolved. Cs<sub>2</sub>CO<sub>3</sub> (163 mg, 0.50 mmol) was then added and the resulting suspension stirred and heated at 100 °C for 24 h. The reaction mixture was cooled to rt then filtered through a small plug of silica (washed with EtOAc). The filtrate was concentrated under reduced pressure to give a crude material. This was then purified *via* column chromatography, eluting EtOAc–hexane 5:95 to give *cyclised bridged derivative 4* (46.0 mg, 62%) as a colourless oil. *R*<sub>f</sub> 0.62 (EtOAc–hexane 20:80).  $\nu_{\text{max}}/\text{cm}^{-1}$ : 2973, 2930, 2852, 1695, 1494, 1325, 1245, 1163, 1048;  $\delta_{\text{H}}$  (500 MHz, CDCl<sub>3</sub>): 8.27 (1H, d, *J* 9.2 Hz, 10-H), 6.72 (1H, dd, *J* 9.2 and 3.1 Hz, 9-H), 6.59 (1H, d, *J* 3.1 Hz, 7-H), 4.56 (1H, br. t, *J* 3.1 Hz, 2-H), 3.77 (3H, s, OMe), 2.96-2.92 (1H, m, 6-H), 2.05 (1H app. d, *J* 13.4 Hz, 3-H<sub>A</sub>), 1.87 (2H, app. t, *J* 2.6 Hz, 11-H<sub>2</sub>), 1.78-1.72 (2H, m, 5-H<sub>2</sub>), 1.54 (9H, s, <sup>t</sup>Bu), 1.50 (1H, ddd, *J* 13.4, 4.7 and 2.8 Hz, 3-H<sub>B</sub>), 1.45-1.37 (1H, m, 4-H<sub>A</sub>), 1.33-1.20 (1H, m, 4-H<sub>B</sub>);  $\delta_{\text{C}}$  (125 MHz, CDCl<sub>3</sub>): 154.2 (C-8), 153.8 (Boc C=O), 133.7 (C-10a), 132.8 (C-6a), 121.5 (C-10), 113.6 (C-7), 111.7 (C-9), 80.6 (<sup>t</sup>Bu C<sub>1</sub>), 55.5 (OMe), 50.0 (C-2), 34.7 (C-6), 33.9 (C-5), 32.1 (C-3), 30.3 (C-11), 28.6 (<sup>t</sup>Bu C<sub>3</sub>), 17.7 (C-4); HRMS found MNa<sup>+</sup> 326.1728. C<sub>18</sub>H<sub>25</sub>NO<sub>3</sub> requires *MNa*, 326.1727.

***tert*-butyl *N*-[(1*R*\*,3*S*\*)-3-(2-bromophenyl)cyclohexyl]carbamate (14)**

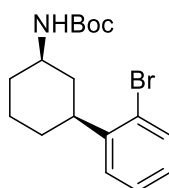

Prepared according to General procedure A, cyclohexylamine (0.50 g, 5.00 mmol) and 2-bromoiodobenzene (2.83 g, 10.0 mmol) gave a crude material. This was then purified *via* column chromatography, eluting EtOAc–hexane 5:95 to give arylated derivative **14**<sup>2</sup> (1.00 g, 57%, *dr* >95:<5 by <sup>1</sup>H NMR) an off-white solid. *R*<sub>f</sub> 0.50 (EtOAc–hexane 20:80). δ<sub>H</sub> (500 MHz, CDCl<sub>3</sub>): 7.53 (1H, dd, *J* 8.0 and 0.8 Hz, phenyl 3-H), 7.28-7.23 (1H, m, phenyl 5-H), 7.20 (1H, dd, *J* 8.0 and 1.7 Hz, phenyl 6-H), 7.03 (1H, td, *J* 8.0 and 1.7 Hz, phenyl 4-H), 4.45 (1H, br. s, NH), 3.69-3.50 (1H, m, 1-H), 3.10 (1H, t, *J* 11.6 Hz, 3-H), 2.24-2.15 (1H, m, 2-H<sub>A</sub>), 2.08 (1H, d, *J* 12.0 Hz, 6-H<sub>A</sub>), 1.92-1.83 (2H, m, 4-H<sub>A</sub> and 5-H<sub>A</sub>), 1.53 (1H, app. qt, *J* 13.2 and 3.2 Hz, 5-H<sub>B</sub>), 1.44 (9H, s, <sup>t</sup>Bu), 1.32-1.17 (2H, m, 2-H<sub>B</sub> and 4-H<sub>B</sub>), 1.11 (1H, qd, *J* 12.6 and 3.8 Hz, 6-H<sub>B</sub>); δ<sub>C</sub> (125 MHz, CDCl<sub>3</sub>): 155.2 (Boc C=O), 144.8 (phenyl C-1), 133.1 (phenyl C-3), 127.7 (phenyl C-4), 127.6 (phenyl C-5), 127.3 (phenyl C-6), 124.6 (phenyl C-2), 79.3 (<sup>t</sup>Bu C<sub>1</sub>), 50.0 (C-1), 42.0 (C-3), 39.9 (C-2), 33.4 (C-6), 32.3 (C-4), 28.6 (<sup>t</sup>Bu C<sub>3</sub>), 25.2 (C-5). All data is consistent with known literature values.<sup>2</sup>

***tert*-butyl (2*R*\*,6*S*\*)-3,4,5,6-tetrahydro-2,6-methanobenzo[*b*]azocine-1(2*H*)-carboxylate (15)**

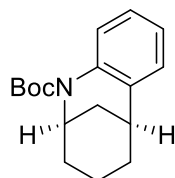

Arylated derivative **14** (100 mg, 0.30 mmol), Pd(OAc)<sub>2</sub> (4.00 mg, 5 mol%) and *rac*-BINAP (14.0 mg, 7.5 mol%) were added to toluene (5 ml) and heated until all solids had dissolved. Cs<sub>2</sub>CO<sub>3</sub> (194 mg, 0.60 mmol) was then added and the resulting suspension stirred and heated at 100 °C for 24 h. The reaction mixture was cooled to rt then filtered through a small plug of silica (washed with EtOAc). The filtrate was concentrated under reduced pressure to give a crude material. This was then purified *via* column chromatography, eluting EtOAc–hexane 2:98 to give *cyclised bridged derivative 15* (33.0 mg, 40%) as a colourless oil. *R*<sub>f</sub> 0.57 (EtOAc–hexane 20:80). ν<sub>max</sub>/cm<sup>-1</sup>: 2973, 2930, 2852, 1705, 1488, 1454, 1366, 1318, 1277, 1254, 1160, 1130; δ<sub>H</sub> (500 MHz, CDCl<sub>3</sub>): 8.32 (1H, d, *J* 8.5 Hz, 10-H), 7.15 (1H, ddd, *J* 8.5, 7.5 and 1.8 Hz, 9-H), 7.03 (1H, dd, *J* 7.5 and 1.8 Hz, 7-H), 6.91 (1H, td, *J* 7.5 and 1.0 Hz, 8-H), 4.60-4.56 (1H, m, 2-H), 3.00-2.95 (1H, m, 6-H), 2.09-2.02 (1H, m, 3-H<sub>A</sub>), 1.92-1.84 (2H, m, 11-H<sub>2</sub>), 1.76



(2H, dt,  $J$  10.6 and 3.5 Hz, 5-H<sub>2</sub>), 1.55 (9H, s, <sup>t</sup>Bu), 1.54-1.50 (1H, m, 3-H<sub>B</sub>), 1.45-1.39 (1H, m, 4-H<sub>A</sub>), 1.31-1.22 (1H, m, 4-H<sub>B</sub>);  $\delta_C$  (125 MHz, CDCl<sub>3</sub>): 153.9 (Boc C=O), 140.2 (C-10a), 131.3 (C-6a), 128.6 (C-7), 126.5 (C-9), 121.7 (C-8), 120.3 (C-10), 80.8 (<sup>t</sup>Bu C<sub>1</sub>), 50.3 (C-2), 34.5 (C-6), 33.9 (C-5), 32.1 (C-3), 30.2 (C-11), 28.6 (<sup>t</sup>Bu C<sub>3</sub>), 17.6 (C-4); HRMS found MNa<sup>+</sup> 296.1619. C<sub>17</sub>H<sub>23</sub>NO<sub>2</sub> requires *MNa*, 296.1621.

***N*-[(1*R*,2*S*,4*R*)-1,7,7-trimethylbicyclo[2.2.1]heptan-2-yl]pyridine-2-carboxamide (**S5**)**

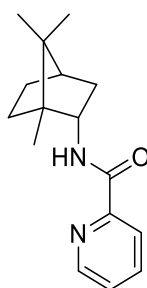

Prepared according to General procedure C, (*R*)-bornylamine (400 mg, 2.61 mmol) gave a crude material. This was then purified *via* column chromatography, eluting EtOAc–hexane 40:60 to give the picolinamide derivative **S5**<sup>3</sup> (604 mg, 90%) as a white solid.  $R_f$  0.41 (EtOAc–hexane 40:60).  $\delta_H$  (500 MHz, CDCl<sub>3</sub>): 8.48 (1H, ddd,  $J$  4.8, 1.7 and 0.9 Hz, pyridinyl 6-H), 8.11 (2H, app. br. d,  $J$  7.7 Hz, pyridinyl 3-H and NH), 7.75 (1H, td,  $J$  7.7 and 0.9 Hz, pyridinyl 4-H), 7.33 (1H, dd,  $J$  7.0 and 4.8 Hz, pyridinyl 5-H), 4.40-4.33 (1H, m, 2-H), 2.38-2.30 (1H, m, 3-H<sub>A</sub>), 1.73 (1H, ddd,  $J$  16.0, 8.1 and 3.8 Hz, 6-H<sub>A</sub>), 1.67-1.59 (2H, m, 4-H and 5-H<sub>A</sub>), 1.39-1.31 (1H, m, 5-H<sub>B</sub>), 1.27-1.20 (1H, m, 6-H<sub>B</sub>), 0.95-0.88 (4H, m, 3-H<sub>B</sub> and methyl), 0.82 (3H, s, methyl), 0.80 (3H, s, methyl);  $\delta_C$  (125 MHz, CDCl<sub>3</sub>): 164.1 (C=O), 150.1 (pyridinyl C-1), 147.9 (pyridinyl C-6), 137.2 (pyridinyl C-4), 125.9 (pyridinyl C-5), 122.1 (pyridinyl C-3), 53.7 (C-2), 49.8 (C-7), 48.2 (C-1), 45.0 (C-4), 37.5 (C-3), 28.4 (C-6), 28.1 (C-5), 19.8 (methyl), 18.7 (methyl), 13.7 (methyl). All data is consistent with known literature values.<sup>3</sup>

***N*-[(1*R*,2*S*,4*R*,6*S*)-6-(3-methoxyphenyl)-1,7,7-trimethylbicyclo[2.2.1]heptan-2-yl]pyridine-2-carboxamide (**S6**)**

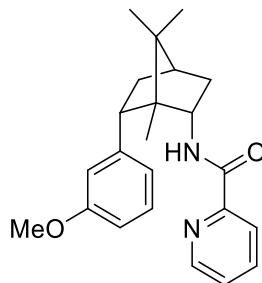

Prepared according to General procedure E, picolinamide derivative **S5** (400 mg, 1.55 mmol) and 3-iodoanisole (0.76 ml, 6.20 mmol) gave a crude material. This was then purified *via* column chromatography, eluting EtOAc–hexane 25:75 to give arylated derivative **S6**<sup>3</sup> (276 mg, 50%, *dr* >95:<5 by <sup>1</sup>H NMR) as a colourless oil. *R*<sub>f</sub> 0.23 (EtOAc–hexane 30:70). δ<sub>H</sub> (500 MHz, CDCl<sub>3</sub>): 8.23 (1H, d, *J* 4.4 Hz, pyridinyl 6-H), 7.95 (1H, d, *J* 7.8 Hz, pyridinyl 3-H), 7.85 (1H, br. d, *J* 8.9 Hz, NH), 7.69 (1H, td, *J* 7.8 and 1.7 Hz, pyridinyl 4-H), 7.28–7.25 (1H, m, pyridinyl 5-H), 7.22 (1H, t, *J* 7.9 Hz, methoxyphenyl 5-H), 7.02 (1H, s, methoxyphenyl 2-H), 7.00 (1H, d, *J* 7.9 Hz, methoxyphenyl 6-H), 6.75 (1H, dd, *J* 7.9 and 2.3 Hz, methoxyphenyl 4-H), 4.57–4.50 (1H, m, 2-H), 3.78 (3H, s, OMe), 3.32 (1H, dd, *J* 11.6 and 5.4 Hz, 6-H), 2.59–2.51 (1H, m, 3-H<sub>A</sub>), 2.30–2.22 (1H, m, 5-H<sub>A</sub>), 2.03 (1H, dd, *J* 13.3 and 5.4 Hz, 5-H<sub>B</sub>), 1.93 (1H, t, *J* 4.6 Hz, 4-H), 1.29 (1H, dd, *J* 13.3 and 5.9 Hz, 3-H<sub>B</sub>), 1.10 (3H, s, methyl), 1.09 (3H, s, methyl), 1.07 (3H, s, methyl); δ<sub>C</sub> (125 MHz, CDCl<sub>3</sub>): 164.5 (C=O), 160.3 (methoxyphenyl C-3), 150.1 (pyridinyl C-1), 147.3 (pyridinyl C-6), 143.9 (methoxyphenyl C-1), 136.9 (pyridinyl C-4), 129.9 (methoxyphenyl C-5), 125.6 (pyridinyl C-5), 121.8 (pyridinyl C-3 and methoxyphenyl C-6), 114.2 (methoxyphenyl C-2), 111.6 (methoxyphenyl C-4), 55.2 (OMe), 54.4 (C-2 and C-1), 51.2 (C-7), 47.9 (C-6), 43.7 (C-4), 37.2 (C-3), 32.9 (C-5), 20.3 (methyl), 20.0 (methyl), 13.9 (methyl). All data is consistent with known literature values.<sup>3</sup>

***N*-[(1*R*,2*S*,4*R*,6*S*)-6-(3-methoxyphenyl)-1,7,7-trimethylbicyclo[2.2.1]heptan-2-yl]acetamide (**16**)**

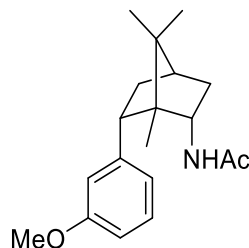

Water (7.6 ml) and HCl (1.9 ml, 37%) were added to a solution of arylated derivative **S6** (276 mg, 0.76 mmol) in THF (7.6 ml) and the solution was stirred at rt for 5 mins. Zinc dust (741 mg, 11.4 mmol) was then added portionwise over 30 mins and the resulting suspension was stirred at rt for 18 h. The reaction mixture was filtered through celite (eluting with DCM) and then saturated aqueous NaHCO<sub>3</sub> (20 ml) was added to the filtrate. The phases were separated and the aqueous phase was extracted with DCM (3 x 20 ml). The organic phases were combined, dried (MgSO<sub>4</sub>), filtered and concentrated under reduced pressure to give the crude amine intermediate. This intermediate was dissolved in THF (10 ml) and the solution was then basified with 2M NaOH. Ac<sub>2</sub>O (0.22 ml, 2.28 mmol) was added to this solution and the reaction mixture was then stirred at rt for 4 h. Water (20 ml) was added and the mixture was then extracted with DCM (3 x 30 ml). The organic layers were combined, dried (MgSO<sub>4</sub>), filtered and concentrated under reduced pressure to give a crude material. This was then purified *via* column chromatography, eluting EtOAc–hexane 50:50 to give the *acetamide derivative 16* (181 mg, 79%) as a colourless oil. *R*<sub>f</sub> 0.42 (EtOAc–hexane 80:20). [α<sub>D</sub><sup>20</sup>] +30.2 (c 0.01, MeOH); ν<sub>max</sub>/cm<sup>-1</sup>: 3425, 2951, 1661, 1598, 1580, 1518, 1490, 1457, 1378, 1267, 1150, 1041; δ<sub>H</sub> (500 MHz, CDCl<sub>3</sub>): 7.31 (1H, t, *J* 8.0 Hz, methoxyphenyl 5-H), 7.04 (1H, d, *J* 7.4 Hz, methoxyphenyl 6-H), 6.94 (1H, s, methoxyphenyl 2-H), 6.81 (1H, dd, *J* 8.0 and 2.4 Hz, methoxyphenyl 4-H), 5.24 (1H, br. d, *J* 8.3 Hz, NH), 4.28-4.21 (1H, m, 2-H), 3.82 (3H, s, OMe), 3.26 (1H, dd, *J* 11.5 and 5.1 Hz, 6-H), 2.48-2.39 (1H, m, 3-H<sub>A</sub>), 2.24-2.15 (1H, td, *J* 13.2 and 4.0 Hz, 5-H<sub>A</sub>), 1.96 (1H, dd, *J* 13.2 and 5.8 Hz, 5-H<sub>B</sub>), 1.87 (1H, t, *J* 4.7 Hz, 4-H), 1.35 (3H, s, acetyl), 1.07 (1H, dd, *J* 13.4 and 5.8 Hz, 3-H<sub>B</sub>), 1.04 (3H, s, methyl) 1.01 (6H, s, dimethyl); δ<sub>C</sub> (125 MHz, CDCl<sub>3</sub>): 169.6 (C=O), 160.1 (methoxyphenyl C-3), 144.8 (methoxyphenyl C-1), 129.8 (methoxyphenyl C-5), 122.2 (methoxyphenyl C-6), 115.4 (methoxyphenyl C-2), 111.6 (methoxyphenyl C-4), 55.4 (OMe), 54.4 (C-2), 54.2 (C-1), 50.9

(C-7), 47.7 (C-6), 43.7 (C-4), 37.1 (C-3), 32.3 (C-5), 23.1 (acetyl), 20.2 (methyl), 19.9 (methyl), 13.9 (methyl); HRMS found  $MH^+$  302.2119.  $C_{19}H_{27}NO_2$  requires  $MH$ , 302.2115.

**1-[(2*R*,3*aS*,9*R*,9*aR*)-7-methoxy-1,1,9*a*-trimethyl-1,2,3,3*a*,9,9*a*-hexahydro-4*H*-2,9-methanocyclopenta[*b*]quinilin-4-yl]ethanone (**S7**)**

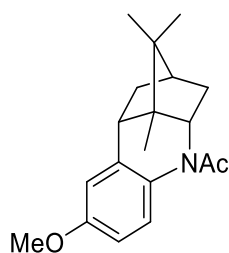

NBS (59 mg, 0.33 mmol) was added to a solution of acetamide derivative **16** (91.0 mg, 0.30 mmol) in MeCN (5 ml) at rt and stirred at rt for 4 h. The reaction mixture was concentrated under reduced pressure to give the crude *p*-bromo intermediate. This intermediate was dissolved in toluene (5 ml) and Pd(OAc)<sub>2</sub> (3.00 mg, 5 mol%), *rac*-BINAP (14.0 mg, 7.5 mol%) and NaO<sup>t</sup>Bu (57.6 mg, 0.60 mmol) were then added sequentially at rt. The reaction mixture was then stirred at 100 °C for 24 h, cooled to rt and filtered through celite (eluting with DCM). The filtrate was then concentrated under reduced pressure to give a crude material. This was purified *via* column chromatography, eluting EtOAc–hexane 20:80 to give the *cyclised acetamide derivative S7* (42.0 mg, 47%) as a colourless oil.  $R_f$  0.55 (EtOAc–hexane 50:50).  $[\alpha_D^{20}] +2.00$  (c 0.01, MeOH);  $\nu_{max}/cm^{-1}$ : 2949, 2878, 1652, 1500, 1462, 1369, 1301, 1273, 1240, 1145, 1110, 1048;  $\delta_H$  (500 MHz, CDCl<sub>3</sub>): 6.72 (1H, dd,  $J$  9.0 and 2.9 Hz, 6-H), 6.64 (1H, d,  $J$  2.9 Hz, 8-H), 3.78 (3H, s, OMe), 2.87 (1H, dt,  $J$  9.3 and 2.4 Hz, 9-H), 2.45–2.33 (2H, m, 3-H<sub>A</sub> and 10-H<sub>A</sub>), 2.32 (3H, s, acetyl), 1.65 (1H, t,  $J$  4.2 Hz, 2-H), 1.02 (3H, s, methyl), 1.00–0.93 (5H, m, 3-H<sub>B</sub>, 10-H<sub>B</sub> and methyl), 0.77 (3H, s, methyl);  $\delta_C$  (125 MHz, CDCl<sub>3</sub>): 171.1 (C=O), 156.3 (C-7), 133.6 (C-4a), 126.7 (C-8a), 124.9 (C-5), 114.3 (C-8), 111.6 (C-6), 56.4 (C-3a), 55.5 (OMe), 48.9 (C-9a), 45.2 (C-1), 42.9 (C-2), 42.4 (C-9), 40.8 (C-3 and C-10), 24.6 (acetyl CH<sub>3</sub>), 19.7 (methyl), 18.9 (methyl), 12.4 (methyl); HRMS found  $MNa^+$  322.1777.  $C_{19}H_{25}NO_2$  requires  $MNa$ , 322.1778. 5-H and 3a-H are not observed by <sup>1</sup>H NMR (500 MHz, CDCl<sub>3</sub>).

**(2*R*,3*aS*,9*R*,9*aR*)-7-methoxy-1,1,9*a*-trimethyl-1,2,3,3*a*,9,9*a*-hexahydro-1*H*-2,9-methanocyclopenta[*b*]quiniline (17)**

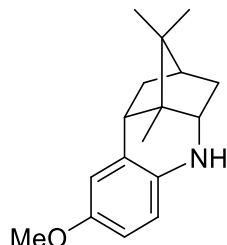

Cyclised acetamide derivative **S7** (40.0 mg, 0.13 mmol) was dissolved in 1:1 HCl–EtOH (10 ml) and stirred at 80 °C for 18 h. The reaction mixture was allowed to cool to rt then concentrated under reduced pressure to give a crude material. This was purified *via* column chromatography, eluting EtOAc–MeOH 95:5 to give the *amine derivative 17* (21.0 mg, 67%) as an off-white solid.  $R_f$  0.67 (EtOAc–MeOH 90:10).  $[\alpha_D^{20}] +6.00$  (c 0.01, MeOH);  $\nu_{\max}/\text{cm}^{-1}$ : 3339, 2918, 2850, 1504, 1462, 1256, 1072;  $\delta_H$  (500 MHz,  $\text{CDCl}_3$ ): 6.66–6.60 (2H, m, 5-H and 8-H), 6.51 (1H, d,  $J$  8.3 Hz, 6-H), 3.74 (3H, s, OMe), 3.50–3.43 (1H, m, 3*a*-H), 2.78 (1H, dt,  $J$  9.0 and 2.8 Hz, 9-H), 2.45–2.38 (1H, m, 10- $H_A$ ), 2.31–2.23 (1H, m, 3- $H_A$ ), 1.52 (1H, t,  $J$  4.3 Hz, 2-H), 1.24 (1H, br. s, NH), 1.04–0.95 (5H, m, 10- $H_B$ , 3- $H_B$  and methyl), 0.93 (3H, s, methyl), 0.73 (3H, s, methyl);  $\delta_C$  (125 MHz,  $\text{CDCl}_3$ ): 151.7 (C-7), 143.7 (C-4*a*), 124.9 (C-8*a*), 115.3 (C-8), 114.3 (C-6), 113.2 (C-5), 55.9 (OMe), 55.8 (C-3*a*), 48.9 (C-9*a*), 42.8 (C-1), 41.7 (C-9), 41.3 (C-2), 40.0 (C-10), 38.8 (C-3), 19.8 (methyl), 19.2 (methyl), 12.8 (methyl); HRMS found  $\text{MH}^+$  258.1867.  $\text{C}_{17}\text{H}_{23}\text{NO}$  requires  $MH$ , 258.1852. The product was isolated as the HCl salt.

**(2*R*,3*aS*,5*S*,10*S*,10*aR*)-8-methoxy-1,1,5,10*a*-tetramethyl-1,2,3,3*a*,4,5,10,10*a*-octahydro-2,10-methanobenzo[*e*]cyclopenta[*b*]azepine (18)**

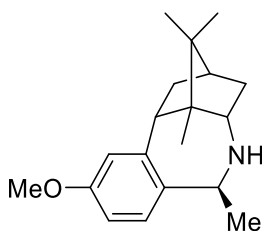

Acetamide derivative **16** (80.0 mg, 0.27 mmol) was dissolved in MeCN (4 ml) and POCl<sub>3</sub> (0.25 ml, 2.70 mmol) was added dropwise at rt. The resulting solution was stirred and heated at 100 °C for 2 h. The reaction mixture was cooled to rt and then all the volatiles were removed under reduced pressure. The residue was dissolved in DCM (10 ml) then water (5 ml) and 5M NaOH was added to basify the solution. This was then extracted with DCM (3 x 20 ml), organic layers combined, dried (MgSO<sub>4</sub>), filtered and concentrated under reduced pressure to give the crude imine intermediate. This intermediate was dissolved in MeOH (4 ml) and NaBH<sub>4</sub> (21.0 mg, 0.54 mmol) was added at rt. The solution was allowed to stir for 2 h then 1M HCl (5 ml) was added to quench the reaction. This solution was basified with 5M NaOH then extracted with DCM (3 x 20 ml). The organic layers were combined, dried (MgSO<sub>4</sub>), filtered and concentrated under reduced pressure to give a crude material. This was then purified *via* column chromatography, eluting EtOAc–MeOH 95:5 to give the *cyclised amine derivative 18* (47.0 mg, 62%, *dr* >95:<5 by <sup>1</sup>H NMR) as a white solid. *R*<sub>f</sub> 0.10 (EtOAc–MeOH 95:5). [ $\alpha$ <sub>D</sub><sup>20</sup>] +39.7 (c 0.01, MeOH);  $\nu_{\text{max}}/\text{cm}^{-1}$ : 3332, 2944, 2833, 1606, 1580, 1506, 1461, 1282, 1239, 1147, 1089;  $\delta_{\text{H}}$  (500 MHz, CDCl<sub>3</sub>): 7.16 (1H, d, *J* 9.2 Hz, 6-H), 6.70-6.65 (2H, m, 7-H and 9-H), 4.42 (1H, q, *J* 6.5 Hz, 5-H), 3.78 (3H, s, OMe), 3.48 (1H, d, *J* 9.7 Hz, 3a-H), 2.98 (1H, dd, *J* 10.6 and 7.9 Hz, 10-H), 2.35-2.07 (3H, m, 3-H<sub>A</sub>, 11-H<sub>A</sub> and NH), 1.82 (1H, t, *J* 4.1 Hz, 2-H), 1.72-1.62 (2H, m, 3-H<sub>B</sub> and 11-H<sub>B</sub>), 1.50 (3H, d, *J* 6.5 Hz, 5-methyl), 1.00 (3H, s, methyl), 0.94 (3H, s, methyl), 0.66 (3H, s, methyl);  $\delta_{\text{C}}$  (125 MHz, CDCl<sub>3</sub>): 157.9 (C-8), 142.9 (C-9a), 138.4 (C-5a), 125.4 (C-6), 119.4 (C-9), 110.1 (C-7), 63.6 (C-3a), 55.3 (OMe), 52.5 (C-10), 49.2 (C-10a), 48.4 (C-1), 45.1 (C-5), 43.3 (C-2), 33.5 (C-3), 32.1 (C-11), 21.6 (methyl C-5), 19.9 (methyl), 19.8 (methyl), 13.0 (methyl); HRMS found MH<sup>+</sup> 286.2171. C<sub>19</sub>H<sub>27</sub>NO requires *MH*, 286.2165. The configuration was determined through NOESY (500 MHz, CDCl<sub>3</sub>). nOe observed between 5-H and 3-H<sub>B</sub> (500 MHz, CDCl<sub>3</sub>).

**methyl 2-[(1*R*,2*S*,4*R*,6*S*)-6-(pyridine-2-carboxamidyl)-1,7,7-trimethylbicyclo[2.2.1]heptan-2-yl]benzoate (19)**

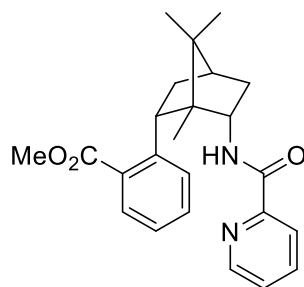

Prepared according to General procedure E, picolinamide derivative **S5** (200 mg, 0.78 mmol) and methyl 2-bromobenzoate (670 mg, 3.10 mmol) gave a crude material. This was then purified *via* column chromatography, eluting EtOAc–hexane 30:60 to give the *arylated ester derivative 19* (160 mg, 53%, *dr* >95:<5 by  $^1\text{H}$  NMR) as a white solid.  $R_f$  0.29 (EtOAc–hexane 40:60).  $[\alpha_D^{20}] +16.2$  (c 0.01, MeOH);  $\nu_{\text{max}}/\text{cm}^{-1}$ : 3364, 2948, 1713, 1663, 1595, 1569, 1508, 1437, 1428, 1395, 1385, 1255, 1210, 1128, 1040;  $\delta_{\text{H}}$  (500 MHz,  $\text{CDCl}_3$ ): 8.22 (1H, ddd,  $J$  4.1, 1.7 and 1.0 Hz, pyridinyl 6-H), 7.95 (1H, dt,  $J$  7.8 and 1.0 Hz, pyridinyl 3-H), 7.87 (1H, d,  $J$  7.7 Hz, phenyl 6-H), 7.70 (1H, td,  $J$  7.8 and 1.7 Hz, pyridinyl 4-H), 7.67 (1H, br. s, NH), 7.63 (1H, dd,  $J$  7.7 and 1.5 Hz, phenyl 3-H), 7.55 (1H, td,  $J$  7.7 and 1.5 Hz, phenyl 5-H), 7.30–7.27 (1H, m, phenyl 4-H), 7.27–7.24 (1H, m, pyridinyl 5-H), 4.65 (1H, dd,  $J$  11.8 and 5.7 Hz, 2-H), 4.48 (1H, app. dddd,  $J$  11.2, 9.2, 6.3 and 1.7 Hz, 6-H), 3.84 (3H, s,  $\text{CO}_2\text{Me}$ ), 2.58 (1H, app. dddd,  $J$  13.5, 11.2, 4.6 and 3.3 Hz, 5- $\text{H}_A$ ), 2.35 (1H, tt,  $J$  13.1 and 3.8 Hz, 3- $\text{H}_A$ ), 2.03 (1H, dd,  $J$  13.1 and 5.7 Hz, 3- $\text{H}_B$ ), 1.97 (1H, t,  $J$  4.6 Hz, 4-H), 1.39 (1H, dd,  $J$  13.5 and 6.3 Hz, 5- $\text{H}_B$ ), 1.13 (3H, s, methyl), 1.08 (3H, s, methyl), 0.83 (3H, s, methyl);  $\delta_{\text{C}}$  (125 MHz,  $\text{CDCl}_3$ ): 170.1 (C=O ester), 164.5 (C=O amide), 149.9 (pyridinyl C-2), 147.3 (pyridinyl C-6), 142.4 (phenyl C-1), 137.0 (pyridinyl C-4), 133.4 (phenyl C-2), 132.3 (phenyl C-5), 130.6 (phenyl C-3), 129.5 (phenyl C-6), 125.7 (pyridinyl C-5), 125.6 (phenyl C-4), 121.9 (pyridinyl C-3), 55.8 (C-1), 55.2 (C-6), 52.1 ( $\text{CO}_2\text{Me}$ ), 51.4 (C-7), 44.0 (C-4), 41.1 (C-2), 36.7 (C-5), 33.9 (C-3), 20.4 (methyl), 20.1 (methyl), 12.6 (methyl); HRMS found  $\text{MH}^+$  393.2182.  $\text{C}_{24}\text{H}_{28}\text{N}_2\text{O}_3$  requires  $\text{MH}$ , 393.2173. The configuration was determined through NOESY (500 MHz,  $\text{CDCl}_3$ ). nOe observed between 2-H and 7-methyl and nOe observed between 6-H and 7-methyl (500 MHz,  $\text{CDCl}_3$ ).

**(2*R*,3*aS*,10*S*,10*aR*)-1,1,10*a*-trimethyl-2,3,3*a*,4,10,10*a*-hexahydro-2,10-methanobenzo[*e*]cyclopenta[*b*]azepin-5(1*H*)-one (20)**

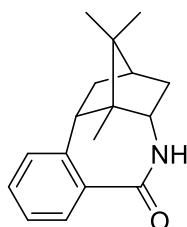

Water (4.3 ml) and HCl (0.96 ml, 37%) were added to a solution of arylated ester derivative **19** (150 mg, 0.38 mmol) in THF (15 ml). The reaction mixture was stirred at rt for 5 mins then

zinc powder (373 mg, 5.74 mmol) was added portionwise over 30 mins. The resulting suspension was stirred at rt for 18 h. The reaction mixture was filtered through celite (eluting with THF) then the filtrate was basified with 5M NaOH solution and the resulting solution allowed to stir at rt for a further 18 h. This was then extracted with DCM (3 x 30 ml), dried (MgSO<sub>4</sub>), filtered and concentrated under reduced pressure to give a crude material. This was then purified *via* column chromatography, eluting EtOAc–hexane 40:60 to give the *lactam derivative* **20** (69.0 mg, 71%) as a white solid. *R*<sub>f</sub> 0.46 (EtOAc–hexane 70:30). [ $\alpha$ <sub>D</sub><sup>20</sup>] +17.7 (c 0.01, MeOH);  $\nu_{\text{max}}/\text{cm}^{-1}$ : 3283, 3050, 2950, 2875, 1645, 1452, 1392, 1372, 1353, 1259, 1208, 1161, 1129, 1029;  $\delta_{\text{H}}$  (500 MHz, CDCl<sub>3</sub>): 8.51 (1H, dd, *J* 8.1 and 1.6 Hz, 6-H), 7.41 (1H, td, *J* 7.7 and 1.6 Hz, 8-H), 7.30 (1H, ddd, *J* 8.1, 7.7 and 1.4 Hz, 7-H), 7.18 (1H, dd, *J* 7.7 and 1.4 Hz, 9-H), 6.44 (1H, br. d, *J* 5.7 Hz, NH), 3.71–3.65 (1H, m, 3a-H), 3.48 (1H, ddd, *J* 12.6, 6.2 and 2.6 Hz, 10-H), 2.53 (1H, tt, *J* 12.6 and 4.0 Hz, 11-H<sub>A</sub>), 2.45–2.38 (1H, m, 3-H<sub>A</sub>), 1.73 (1H, t, *J* 4.7 Hz, 2-H), 1.19 (1H, dd, *J* 13.0 and 5.6 Hz, 3-H<sub>B</sub>), 1.14 (1H, dd, *J* 12.6 and 6.2 Hz, 11-H<sub>B</sub>), 1.09 (3H, s, methyl), 0.99 (3H, s, methyl), 0.91 (3H, s, methyl);  $\delta_{\text{C}}$  (125 MHz, CDCl<sub>3</sub>): 167.9 (C=O), 143.8 (C-9a), 133.7 (C-6), 132.4 (C-9), 132.1 (C-8), 128.8 (C-5a), 126.1 (C-7), 59.0 (C-3a), 51.5 (C-10), 50.4 (C-10a), 47.8 (C-1), 41.3 (C-2), 40.9 (C-11), 39.5 (C-3), 20.0 (methyl), 19.9 (methyl), 13.1 (methyl); HRMS found MH<sup>+</sup> 256.1692. C<sub>17</sub>H<sub>21</sub>NO requires *MH*, 256.1696.

***N*-[(1*R*,2*S*,4*R*,6*R*)-6-(2-fluoropyridin-3-yl)-1,7,7-trimethylbicyclo[2.2.1]heptan-2-yl]pyridine-2-carboxamide (21)**

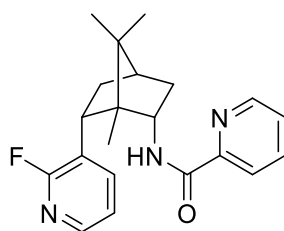

Prepared according to General procedure E, picolinamide derivative **S5** (200 mg, 0.78 mmol) and 2-fluoro-3-iodopyridine (691 mg, 3.10 mmol) gave a crude material. This was then purified *via* column chromatography, eluting EtOAc–hexane 35:65 to give *arylated derivative* **21** (118 mg, 42%, *dr* >95:<5 by <sup>1</sup>H NMR) as a colourless oil. *R*<sub>f</sub> 0.17 (EtOAc–hexane 40:60). [ $\alpha$ <sub>D</sub><sup>20</sup>]



+2.50 (c 0.01, MeOH);  $\nu_{\max}/\text{cm}^{-1}$ : 3387, 3057, 2957, 1676, 1595, 1570, 1517, 1461, 1398, 1345, 1279, 1241, 1163, 1070;  $\delta_{\text{H}}$  (500 MHz,  $\text{CDCl}_3$ ): 8.23 (1H, d,  $J$  4.5 Hz, pyridinyl 6-H), 8.06 (1H, d,  $J$  4.8 Hz, fluoropyridinyl 6-H), 8.03 (1H, t,  $J$  7.9 Hz, fluoropyridinyl 4-H), 7.98 (1H, d,  $J$  7.8 Hz, pyridinyl 3-H), 7.72 (1H, td,  $J$  7.8 and 1.6 Hz, pyridinyl 4-H), 7.69 (1H, br. s, NH), 7.30 (1H, ddd,  $J$  7.8, 4.5 and 0.8 Hz, pyridinyl 5-H), 7.22-7.18 (1H, m, fluoropyridinyl 5-H), 4.53-4.47 (1H, m, 2-H), 3.57 (1H, dd,  $J$  11.8 and 5.6 Hz, 6-H), 2.66-2.58 (1H, m, 3- $\text{H}_{\text{A}}$ ), 2.29 (1H, tt,  $J$  12.9 and 3.7 Hz, 5- $\text{H}_{\text{A}}$ ), 2.00-1.93 (2H, m, 5- $\text{H}_{\text{B}}$  and 4-H), 1.36 (1H, dd,  $J$  13.5 and 6.0 Hz, 3- $\text{H}_{\text{B}}$ ), 1.12 (3H, s, methyl), 1.11 (3H, s, methyl), 1.06 (3H, d,  $J$  4.0 Hz, methyl);  $\delta_{\text{C}}$  (125 MHz,  $\text{CDCl}_3$ ): 164.3 (C=O), 162.5 (d,  $J$  239.4 Hz, fluoropyridinyl C-2), 149.6 (pyridinyl C-2), 147.4 (pyridinyl C-6), 144.8 (d,  $J$  15.2 Hz, fluoropyridinyl C-6), 141.2 (d,  $J$  5.0 Hz, fluoropyridinyl C-4), 137.2 (pyridinyl C-4), 125.9 (pyridinyl C-5), 124.8 (d,  $J$  29.0 Hz, fluoropyridinyl C-3), 122.1 (d,  $J$  4.1 Hz, fluoropyridinyl 5-H), 121.9 (pyridinyl C-3), 55.5 (C-1), 54.9 (C-2), 51.4 (C-7), 43.8 (C-4), 41.2 (C-6), 36.9 (C-3), 33.2 (C-5), 20.3 (methyl), 19.9 (methyl), 13.5 (methyl);  $\delta_{\text{F}}$  (470 MHz,  $\text{CDCl}_3$ ): -66.3 (pyridinyl CF); HRMS found  $\text{MH}^+$  354.1993.  $\text{C}_{21}\text{H}_{24}\text{FN}_3\text{O}$  requires  $\text{MH}$ , 354.1976. The configuration was determined through NOESY (500 MHz,  $\text{CDCl}_3$ ). nOe observed between 2-H and 7-methyl and nOe observed between 6-H and 7-methyl (500 MHz,  $\text{CDCl}_3$ ).

**(5*R*,5*aR*,7*R*,8*aS*)-5*a*,6,6-trimethyl-5*a*,6,7,8,8*a*,9-hexahydro-5*H*-5,7-methanocyclopenta[*b*][1,8]naphthyridine (22)**

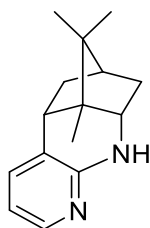

Water (3.5 ml) and HCl (0.78 ml, 37%) were added to a solution of arylated derivative **21** (110 mg, 0.31 mmol) in THF (15 ml) at rt. The solution was stirred at rt for 5 mins then zinc powder (304 mg, 4.67 mmol) was added portionwise over 30 mins. The resulting suspension was stirred at rt for 18 h. The reaction mixture was filtered through celite (eluting with EtOAc) and saturated aqueous  $\text{NaHCO}_3$  solution (10 ml) was added to the filtrate. This was then extracted

with DCM (3 x 20 ml), organic layers combined, dried (MgSO<sub>4</sub>), filtered and concentrated under reduced pressure to give a crude material. This was purified *via* column chromatography, eluting EtOAc to give the *fused-ring pyridine derivative* **22** (40.0 mg, 55%) as a white solid. *R*<sub>f</sub> 0.26 (EtOAc). [ $\alpha$ <sub>D</sub><sup>20</sup>] +34.8 (c 0.01, MeOH);  $\nu_{\text{max}}/\text{cm}^{-1}$ : 3329, 2948, 2928, 2871, 1602, 1537, 1456, 1389, 1323, 1289, 1162, 1077;  $\delta_{\text{H}}$  (500 MHz, CDCl<sub>3</sub>): 7.86 (1H, dd, *J* 5.1 and 1.0 Hz, 2-H), 7.27-7.23 (1H, m, 4-H, overlaps with residual chloroform peak), 6.52 (1H, dd, *J* 6.8 and 5.1 Hz, 3-H), 5.80 (1H, br. s, NH), 3.63-3.56 (1H, m, 8a-H), 2.83 (1H, dt, *J* 8.6 and 3.3 Hz, 5-H), 2.45 (1H, tt, *J* 12.3 and 3.8 Hz, 10-H<sub>A</sub>), 2.40-2.33 (1H, m, 8-H<sub>A</sub>), 1.56 (1H, t, *J* 4.3 Hz, 7-H), 1.00 (3H, s, methyl), 0.99-0.93 (5H, m, 10-H<sub>B</sub>, 8-H<sub>B</sub> and methyl), 0.72 (3H, s, methyl);  $\delta_{\text{C}}$  (125 MHz, CDCl<sub>3</sub>): 151.7 (C-9a), 144.3 (C-2), 137.7 (C-4), 120.2 (C-4a), 112.4 (C-3), 55.7 (C-8a), 48.9 (C-5a), 42.8 (C-6), 41.3 (C-5), 41.0 (C-7), 39.7 (C-8), 39.3 (C-10), 19.6 (methyl), 19.3 (methyl), 12.7 (methyl); HRMS found MH<sup>+</sup> 229.1705. C<sub>15</sub>H<sub>20</sub>N<sub>2</sub> requires *MH*, 229.1699.

**methyl (1*R*\*,4*R*\*)-4-[(pyridine-2-carbonyl)amino]cyclohexane-1-carboxylate (S8)**

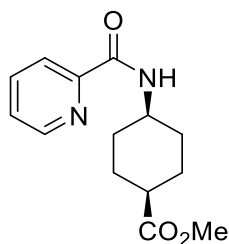

Prepared according to an adapted General procedure C, *cis*-4-amino-cyclohexanecarboxylic acid methyl ester hydrochloride (1.00 g, 5.18 mmol) followed by addition of a saturated aqueous solution of NaHCO<sub>3</sub> instead of 5M NaOH gave a crude material. This was then purified *via* column chromatography, eluting EtOAc–hexane 30:70 to give picolinamide derivative **S8**<sup>4</sup> (1.24 g, 91%) as a colourless oil. *R*<sub>f</sub> 0.20 (EtOAc–hexane 40:60).  $\delta_{\text{H}}$  (500 MHz, CDCl<sub>3</sub>): 8.54 (1H, ddd, *J* 4.8, 1.7 and 0.9 Hz, pyridinyl 6-H), 8.18 (1H, dt, *J* 7.7 and 1.2 Hz, pyridinyl 3-H), 8.12 (1H, br. d, *J* 6.6 Hz, NH), 7.83 (1H, td, *J* 7.7 and 1.7 Hz, pyridinyl 4-H), 7.41 (1H, ddd, *J* 7.7, 4.8 and 1.2 Hz, pyridinyl 5-H), 4.18-4.11 (1H, m, 4-H), 3.70 (1H, s, CO<sub>2</sub>Me), 2.56-2.50 (1H, m, 1-H), 2.02-1.93 (2H, m, 2-H<sub>A</sub> and 6-H<sub>A</sub>), 1.85-1.69 (6H, m, 2-H<sub>B</sub>, 6-H<sub>B</sub>, 3-H<sub>2</sub> and 5-H<sub>2</sub>);  $\delta_{\text{C}}$  (125 MHz, CDCl<sub>3</sub>): 175.7 (C=O ester), 163.6 (C=O amide), 150.2 (pyridinyl C-2), 148.2 (pyridinyl C-6), 137.4 (pyridinyl C-4), 126.2 (pyridinyl C-5), 122.2

(pyridinyl C-3), 51.8 (CO<sub>2</sub>Me), 45.9 (C-4), 40.4 (C-1), 29.6 (C<sub>2</sub>-3,5), 25.2 (C<sub>2</sub>-2,6). All data is consistent with known literature values.<sup>4</sup>

**methyl (1*R*\*,2*S*\*,4*S*\*)-4-[(pyridine-2-carbonyl)amino]-2-(3-methoxyphenyl)cyclohexane-1-carboxylate (S9)**

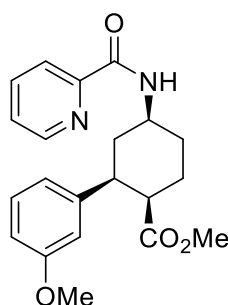

Prepared according to General procedure D, picolinamide derivative **S8** (200 mg, 0.76 mmol) and 3-iodoanisole (0.55 ml, 4.58 mmol) gave a crude material. This was then purified *via* column chromatography eluting with EtOAc–hexane 25:75 to give *arylated derivative S9* (243 mg, 87%, *dr* >95:<5 by <sup>1</sup>H NMR) as a colourless oil. *R*<sub>f</sub> 0.22 (EtOAc–hexane 40:60). *v*<sub>max</sub>/cm<sup>-1</sup>: 3377, 2944, 2864, 1726, 1669, 1585, 1516, 1433, 1239, 1158; δ<sub>H</sub> (500 MHz, CDCl<sub>3</sub>): 8.56 (1H, d, *J* 4.8 Hz, pyridinyl 6-H), 8.20 (1H, d, *J* 7.7 Hz, pyridinyl 3-H), 8.11 (1H, br. d, *J* 8.4 Hz, NH), 7.84 (1H, td, *J* 7.7 and 1.5 Hz, pyridinyl 4-H), 7.42 (1H, dd, *J* 7.7 and 4.8 Hz, pyridinyl 5-H), 7.19 (1H, t, *J* 7.7 Hz, methoxyphenyl 5-H), 6.80 (1H, d, *J* 7.7 Hz, methoxyphenyl 6-H), 6.78-6.72 (2H, m, methoxyphenyl 2-H and methoxyphenyl 4-H), 4.17 (1H, tdt, *J* 12.2, 8.4 and 4.1 Hz, 4-H), 3.78 (3H, s, OMe), 3.45 (3H, s, CO<sub>2</sub>Me), 3.05-2.96 (2H, m, 1-H and 2-H), 2.47 (1H, app. q, *J* 12.2 Hz, 3-H<sub>A</sub>), 2.17-2.11 (2H, m, 3-H<sub>B</sub> and 5-H<sub>A</sub>), 2.03-1.81 (3H, m, 5-H<sub>B</sub> and 6-H<sub>2</sub>); δ<sub>C</sub> (125 MHz, CDCl<sub>3</sub>): 174.3 (C=O ester), 163.6 (C=O amide), 159.7 (methoxyphenyl C-3), 150.2 (pyridinyl C-2), 148.2 (pyridinyl C-6), 144.6 (methoxyphenyl C-1), 137.5 (pyridinyl C-4), 129.3 (methoxyphenyl C-5), 126.2 (pyridinyl C-5), 122.4 (pyridinyl C-3), 119.8 (methoxyphenyl C-6), 113.3 (methoxyphenyl C-2), 112.1 (methoxyphenyl C-4), 55.3 (OMe), 51.2 (CO<sub>2</sub>Me), 48.5 (C-4), 44.8 (C-1), 44.0 (C-2), 32.6 (C-3), 28.2 (C-6), 28.0 (C-5); HRMS found MH<sup>+</sup> 369.1818. C<sub>21</sub>H<sub>24</sub>N<sub>2</sub>O<sub>4</sub> requires *MH*, 369.1809. The relative configuration was determined through NOESY (500 MHz, CDCl<sub>3</sub>). nOe observed between CO<sub>2</sub>Me and methoxyphenyl 2-H and nOe observed between 2-H and 4-H (500 MHz, CDCl<sub>3</sub>).

**methyl (1*R*\*,2*S*\*,4*S*\*)-4-acetamido-2-(3-methoxyphenyl)cyclohexane-1-carboxylate (23)**

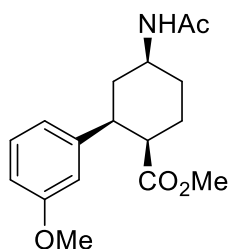

Water (7.40 ml) was added to arylated derivative **S9** (240 mg, 0.65 mmol) in THF (7.40 ml) then HCl (1.64 ml, 37%) was added and the solution stirred for 5 mins at rt. Then zinc powder (636 mg, 9.78 mmol) was added portionwise and the resulting suspension allowed to stir at rt for a further 2 h. The reaction mixture was filtered through celite (eluting with EtOAc) then saturated aqueous NaHCO<sub>3</sub> (20 ml) was added to the filtrate. The phases were separated and the aqueous phase extracted with EtOAc (3 x 30 ml). The organic phases were combined, dried (MgSO<sub>4</sub>), filtered and concentrated under reduced pressure to give the crude amine intermediate. This was dissolved in DCM (20 ml) then Et<sub>3</sub>N (0.91 ml, 6.50 mmol) and Ac<sub>2</sub>O (0.61 ml, 6.50 mmol) were added sequentially. The reaction mixture was then stirred at rt for 18 h then saturated aqueous NH<sub>4</sub>Cl (20 ml) was added to the reaction mixture. The phases were separated and the aqueous phase extracted with DCM (3 x 30 ml). The organic phases were combined, dried (MgSO<sub>4</sub>), filtered and concentrated under reduced pressure to give a crude material. This was then purified *via* column chromatography, eluting EtOAc–hexane 75:25 → 100% EtOAc to give *acetamide derivative 23* (108 mg, 54%) as a colourless oil. *R*<sub>f</sub> 0.24 (EtOAc). *v*<sub>max</sub>/cm<sup>-1</sup>: 3277, 2935, 2836, 1728, 1651, 1527, 1434, 1293, 1166; δ<sub>H</sub> (500 MHz, CDCl<sub>3</sub>): 7.19 (1H, t, *J* 7.8 Hz, phenyl 5-H), 6.78-6.72 (3H, m, phenyl 2-H, phenyl 4-H and phenyl 6-H), 5.44 (1H, br. d, *J* 8.1 Hz, NH), 4.10-3.91 (1H, m, 4-H), 3.78 (3H, s, OMe), 3.43 (3H, s, CO<sub>2</sub>Me), 2.96-2.91 (2H, m, 1-H and 2-H), 2.27 (1H, app. q, *J* 12.2 Hz, 3-H<sub>A</sub>), 2.09-2.01 (2H, m, 3-H<sub>B</sub> and 5-H<sub>A</sub>), 1.98 (3H, s, acetyl), 1.92-1.86 (1H, m, 6-H<sub>A</sub>), 1.83 (1H, dt, *J* 13.5 and 4.1 Hz, 6-H<sub>B</sub>), 1.71-1.60 (1H, m, 5-H<sub>B</sub>); δ<sub>C</sub> (125 MHz, CDCl<sub>3</sub>): 174.4 (C=O ester), 169.3 (C=O amide), 159.7 (phenyl C-3), 144.5 (phenyl C-1), 129.3 (phenyl C-5), 119.7 (phenyl C-6), 113.3 (phenyl C-2), 112.0 (phenyl C-4), 55.3 (OMe), 51.2 (CO<sub>2</sub>Me), 48.5 (C-4), 44.7 (C-1), 44.0 (C-2), 32.7 (C-3), 28.0 (C-6), 27.9 (C-5), 23.8 (acetyl CH<sub>3</sub>); HRMS found MH<sup>+</sup> 306.1700. C<sub>17</sub>H<sub>23</sub>NO<sub>4</sub> requires *MH*, 306.1700.

**methyl (2*R*\*,5*S*\*,6*R*\*)-1-acetyl-8-methoxy-1,2,3,4,5,6-hexahydro-2,6-methano-1-benzazocine-5-carboxylate (24)**

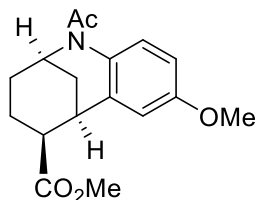

Acetamide derivative **23** (81.0 mg, 0.27 mmol) was dissolved in MeCN (5 ml) then NBS (52.0 mg, 0.29 mmol) was added and the reaction mixture left to stir at rt for 18 h. The volatiles were removed under reduced pressure to give the crude brominated intermediate. This was then dissolved in toluene (2 ml) and added to a pressure vial. Then Pd(OAc)<sub>2</sub> (3.00 mg, 5 mol%), *rac*-BINAP (13.0 mg, 7.5 mol%) and Cs<sub>2</sub>CO<sub>3</sub> (176 mg, 0.54 mmol) were added sequentially and the resulting reaction mixture stirred at 100 °C for 24 h. The reaction mixture was allowed to cool to room temperature, filtered through celite (eluting with DCM) and concentrated under reduced pressure to give a crude material. This was then purified *via* column chromatography, eluting EtOAc–hexane 50:50 to give the *cyclised acetamide derivative 24* (35.0 mg, 43%) as a colourless oil. *R*<sub>f</sub> 0.58 (EtOAc).  $\nu_{\text{max}}/\text{cm}^{-1}$ : 2993, 2835, 1730, 1649, 1493, 1434, 1305, 1264, 1176, 1049;  $\delta_{\text{H}}$  (500 MHz, CDCl<sub>3</sub>): 6.73 (1H, dd, *J* 9.2 and 3.0 Hz, 9-H), 6.52 (1H, d, *J* 3.0 Hz, 7-H), 4.59 (1H, app. br. s, 2-H), 3.74 (3H, s, OMe), 3.69 (3H, s, CO<sub>2</sub>Me), 3.50 (1H, d, *J* 2.8 Hz, 6-H), 2.73 (1H, dt, *J* 12.8 and 3.6 Hz, 5-H), 2.35 (3H, s, acetyl), 2.15 (1H, br. d, *J* 13.5 Hz, 3-H<sub>A</sub>), 1.99 (2H, app. s, 11-H<sub>2</sub>), 1.76-1.70 (1H, m, 4-H<sub>A</sub>), 1.60 (1H, app. t, *J* 13.5 Hz, 3-H<sub>B</sub>), 1.38 (1H, qd, *J* 13.7 and 4.0 Hz, 4-H<sub>B</sub>);  $\delta_{\text{C}}$  (125 MHz, CDCl<sub>3</sub>): 173.7 (C=O ester), 170.7 (C=O amide), 155.1 (C-8), 133.2 (C-10a), 129.7 (C-10), 123.1 (C-6a), 114.1 (C-7), 112.6 (C-9), 55.5 (OMe), 51.7 (CO<sub>2</sub>Me), 49.1 (C-2), 48.2 (C-5), 36.7 (C-6), 31.3 (C-11), 31.0 (C-3), 25.1 (acetyl CH<sub>3</sub>), 19.5 (C-4); HRMS found MH<sup>+</sup> 304.1544. C<sub>17</sub>H<sub>21</sub>NO<sub>4</sub> requires *MH*, 304.1543. 10-H is not observed by <sup>1</sup>H NMR (500 MHz, CDCl<sub>3</sub>).

**methyl (1*R*\*,2*S*\*,4*S*\*)-2-(2-fluoropyridin-3-yl)-4-[(pyridine-2-carbonyl)amino]cyclohexane-1-carboxylate (25)**

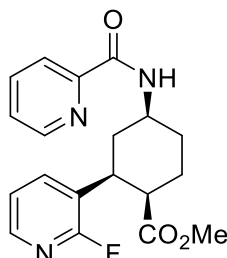

Prepared according to General procedure D, picolinamide derivative **S9** (200 mg, 0.76 mmol) and 2-fluoro-3-iodopyridine (1.02 g, 4.58 mmol) gave a crude material. This was then purified *via* column chromatography eluting with EtOAc–hexane 40:60 to give the *arylated derivative* **25** (105 mg, 39%, *dr* >95:<5 by  $^1\text{H}$  NMR) as a pale-yellow solid.  $R_f$  0.13 (EtOAc–hexane 40:60).  $\nu_{\text{max}}/\text{cm}^{-1}$ : 3386, 2845, 1733, 1670, 1520, 1205;  $\delta_{\text{H}}$  (500 MHz,  $\text{CDCl}_3$ ): 8.57 (1H, ddd,  $J$  4.8, 1.7 and 0.9 Hz, pyridinyl 6-H), 8.20 (1H, dt,  $J$  7.8 and 1.2 Hz, pyridinyl 3-H), 8.10 (1H, br. d,  $J$  8.4 Hz, NH), 8.07 (1H, dt,  $J$  4.7 and 1.5 Hz, fluoropyridinyl 6-H), 7.86 (1H, td,  $J$  7.8 and 1.7 Hz, pyridinyl 4-H), 7.73-7.68 (1H, m, fluoropyridinyl 4-H), 7.44 (1H, ddd,  $J$  7.8, 4.8 and 1.2 Hz, pyridinyl 5-H), 7.15-7.11 (1H, m, fluoropyridinyl 5-H), 4.19 (1H, tdt,  $J$  12.4, 8.4 and 4.1 Hz, 4-H), 3.45 (3H, s,  $\text{CO}_2\text{Me}$ ), 3.29 (1H, dt,  $J$  13.1 and 3.8 Hz, 2-H), 3.16-3.13 (1H, m, 1-H), 2.46 (1H, q,  $J$  12.2 Hz, 3- $\text{H}_A$ ), 2.23 (1H, dq,  $J$  14.0 and 6.1 Hz, 6- $\text{H}_A$ ), 2.16-2.11 (1H, m, 3- $\text{H}_B$ ), 2.07-2.01 (1H, m, 5- $\text{H}_A$ ), 2.01-1.93 (1H, m, 6- $\text{H}_B$ ), 1.74 (1H, qd,  $J$  12.7 and 4.1 Hz, 5- $\text{H}_B$ );  $\delta_{\text{C}}$  (125 MHz,  $\text{CDCl}_3$ ): 173.7 (C=O ester), 163.7 (C=O amide), 161.5 (d,  $J$  238.1 Hz, fluoropyridinyl C-2), 150.1 (pyridinyl C-2), 148.2 (pyridinyl C-6), 145.6 (d,  $J$  15.1 Hz, fluoropyridinyl C-6), 139.4 (d,  $J$  5.2 Hz, fluoropyridinyl C-4), 137.6 (pyridinyl C-4), 126.4 (pyridinyl C-5), 124.8 (d,  $J$  29.0 Hz, fluoropyridinyl C-3), 122.4 (pyridinyl C-3), 121.4 (d,  $J$  4.1 Hz, fluoropyridinyl C-5), 51.3 ( $\text{CO}_2\text{Me}$ ), 48.4 (C-4), 42.2 (C-1), 36.6 (d,  $J$  2.5 Hz, C-2), 31.7 (C-3), 28.2 (C-5), 28.0 (C-6);  $\delta_{\text{F}}$  (470 MHz,  $\text{CDCl}_3$ ): -72.5 (pyridinyl CF) HRMS found  $\text{MH}^+$  358.1573.  $\text{C}_{19}\text{H}_{20}\text{FN}_3\text{O}_3$  requires  $\text{MH}$ , 358.1561. The relative configuration was determined through NOESY (500 MHz,  $\text{CDCl}_3$ ). nOe observed between  $\text{CO}_2\text{Me}$  and fluoropyridinyl 4-H and nOe observed between 2-H and 4-H (500 MHz,  $\text{CDCl}_3$ ).

***N*-(cyclopropylmethyl)pyridine-2-carboxamide (S10)**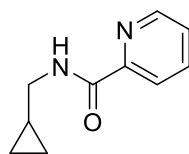

A mixture of picolinic acid (2.08 g, 16.9 mmol), cyclopropanemethylamine (1.00 g, 14.1 mmol) and Et<sub>3</sub>N (3.92 ml, 28.2 mmol) were dissolved in DCM (20 ml). POCl<sub>3</sub> (2.63 ml, 28.2 mmol) was added dropwise at 0 °C then the reaction mixture was stirred at rt for 2 h. DCM (20 ml) and 1M NaOH (30 ml) were added at 0 °C, then the phases were separated and the aqueous phase extracted with DCM (3 x 30 ml). The organic phases were combined, washed with water (20 ml), dried (MgSO<sub>4</sub>), filtered and concentrated under reduced pressure to give a crude material. This was then purified *via* column chromatography, eluting EtOAc–hexane 20:80 to give the picolinamide derivative **S10**<sup>5</sup> (1.75 g, 71%) as a white solid. *R*<sub>f</sub> 0.30 (EtOAc–hexane 30:70). δ<sub>H</sub> (500 MHz, CDCl<sub>3</sub>): 8.57 (1H, dd, *J* 4.7 and 0.7 Hz, pyridinyl 6-H), 8.21 (1H, d, *J* 7.8 Hz, pyridinyl 3-H), 8.13 (1H, br. s, NH), 7.85 (1H, td, *J* 7.8 and 1.7 Hz, pyridinyl 4-H), 7.42 (1H, ddd, *J* 7.2, 4.7 and 0.7 Hz, pyridinyl 5-H), 3.35 (2H, app. t, *J* 6.8 Hz, cyclopropylmethyl 1-H<sub>2</sub>), 1.13-1.04 (1H, m, cyclopropylmethyl 2-H), 0.59-0.54 (2H, m, cyclopropylmethyl 3-H<sub>A</sub> and cyclopropylmethyl 4-H<sub>A</sub>), 0.34-0.26 (2H, m, cyclopropylmethyl 3-H<sub>B</sub> and cyclopropylmethyl 4-H<sub>B</sub>); δ<sub>C</sub> (125 MHz, CDCl<sub>3</sub>): 164.3 (C=O), 150.3 (pyridinyl C-2), 148.2 (pyridinyl C-6), 137.5 (pyridinyl C-4), 126.2 (pyridinyl C-5), 122.4 (pyridinyl C-3), 44.4 (cyclopropylmethyl C-1), 10.9 (cyclopropylmethyl C-2), 3.7 (cyclopropylmethyl C-3 and cyclopropylmethyl C-4). All data is consistent with known literature values.<sup>5</sup>

***N*-{[(1*R*\*,2*S*\*)-2-(3-methoxyphenyl)cyclopropyl]methyl}pyridine-2-carboxamide (26)**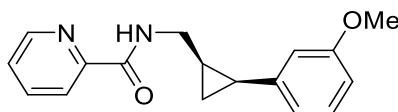

Prepared according to General procedure F, picolinamide derivative **S10** (200 mg, 1.14 mmol) and 3-iodoanisole (0.15 ml, 1.25 mmol) gave a crude material. This was purified *via* column chromatography, eluting EtOAc–hexane 20:80 to give the *arylated derivative* **26** (220 mg, 68%, *dr* >95:<5 by  $^1\text{H}$  NMR) as a white solid.  $R_f$  0.27 (EtOAc–hexane 30:70).  $\nu_{\text{max}}/\text{cm}^{-1}$ : 3354, 3008, 2936, 1659, 1519, 1431, 1238, 1160, 1044;  $\delta_{\text{H}}$  (500 MHz,  $\text{CDCl}_3$ ): 8.53 (1H, ddd,  $J$  4.8, 1.7 and 0.9 Hz, pyridinyl 6-H), 8.15 (1H, dt,  $J$  7.8 and 1.2 Hz, pyridinyl 3-H), 7.96 (1H, br. s, NH), 7.82 (1H, td,  $J$  7.8 and 1.7 Hz, pyridinyl 4-H), 7.40 (1H, ddd,  $J$  7.8, 4.8 and 1.2 Hz, pyridinyl 5-H), 7.22 (1H, t,  $J$  7.9 Hz, methoxyphenyl 5-H), 6.89-6.84 (2H, m, methoxyphenyl 6-H and methoxyphenyl 2-H), 6.76 (1H, dd,  $J$  7.9 and 2.5 Hz, methoxyphenyl 4-H), 3.81 (3H, s, OMe), 3.44-3.37 (1H, m, cyclopropylmethyl 1- $\text{H}_A$ ), 3.05-2.98 (1H, m, cyclopropylmethyl 1- $\text{H}_B$ ), 2.29 (1H, td,  $J$  8.3 and 6.3 Hz, 2-H), 1.55-1.47 (1H, m, 1-H), 1.07 (1H, td,  $J$  8.3 and 5.4 Hz, 3- $\text{H}_A$ ), 0.94 (1H, dd,  $J$  11.4 and 5.4 Hz, 3- $\text{H}_B$ );  $\delta_{\text{C}}$  (125 MHz,  $\text{CDCl}_3$ ): 164.2 (C=O), 159.8 (methoxyphenyl C-3), 150.2 (pyridinyl C-2), 148.1 (pyridinyl C-6), 139.9 (methoxyphenyl C-1), 137.4 (pyridinyl C-4), 129.4 (methoxyphenyl C-5), 126.1 (pyridinyl C-5), 122.3 (pyridinyl C-3), 121.5 (methoxyphenyl C-6), 114.8 (methoxyphenyl C-2), 112.2 (methoxyphenyl C-4), 55.3 (OMe), 39.6 (cyclopropylmethyl C-1), 21.0 (C-2), 18.4 (C-1), 8.6 (C-3); HRMS found  $\text{MNa}^+$  305.1269.  $\text{C}_{17}\text{H}_{18}\text{N}_2\text{O}_2$  requires  $\text{MNa}$ , 305.1260. The relative configuration was determined through NOESY (500 MHz,  $\text{CDCl}_3$ ). nOe observed between 1-H and 2-H and nOe observed between cyclopropylmethyl 1- $\text{H}_2$  and methoxyphenyl 2-H (500 MHz,  $\text{CDCl}_3$ ).

***N*-{[(1*R*\*,2*S*\*)-2-(3-methoxyphenyl)cyclopropyl]methyl}acetamide (**S11**)**

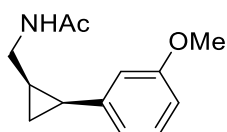

Water (7.8 ml) and HCl (1.79 ml, 37%) were added to a solution of arylated derivative **26** (200 mg, 0.71 mmol) in THF (10 ml). The solution was stirred for 5 mins at rt then zinc (689 mg, 10.6 mmol) was added portionwise and the resulting suspension left to stir at rt for 3 h. The mixture was filtered through celite (eluting with DCM) and saturated aqueous  $\text{NaHCO}_3$  (40 ml) was added to the filtrate. The phases were separated and the aqueous phase extracted with DCM (3 x 30 ml). The organic layers were combined, dried ( $\text{MgSO}_4$ ), filtered and concentrated under reduced pressure to give the crude amine intermediate. This intermediate was dissolved in THF



(10 ml), basified with 2M NaOH, then Ac<sub>2</sub>O (0.20 ml, 2.13 mmol) was added and the resulting solution stirred at rt for 18 h. Water (20 ml) was added and the mixture was extracted with DCM (3 x 30 ml). The organic layers were combined, dried (MgSO<sub>4</sub>), filtered and concentrated under reduced pressure to give a crude material. This was then purified *via* column chromatography, eluting EtOAc–hexane 90:10 to give *acetamide derivative S11* (94.0 mg, 60%) as a colourless oil. *R*<sub>f</sub> 0.26 (EtOAc–hexane 90:10).  $\nu_{\max}/\text{cm}^{-1}$ : 3282, 3070, 2932, 1648, 1580, 1545, 1434, 1370, 1271, 1253, 1150, 1042;  $\delta_{\text{H}}$  (500 MHz, CDCl<sub>3</sub>): 7.20 (1H, t, *J* 7.7 Hz, phenyl 5-H), 6.83-6.79 (1H, m, phenyl 6-H), 6.77-6.72 (2H, m, phenyl 2-H and phenyl 4-H), 5.27 (1H, br. s, NH), 3.80 (3H, s, OMe), 3.22 (1H, dt, *J* 13.7 and 6.7 Hz, cyclopropylmethyl 1-H<sub>A</sub>), 2.84-2.78 (1H, m, cyclopropylmethyl 1-H<sub>B</sub>), 2.22 (1H, td, *J* 8.6 and 6.3 Hz, 2-H), 1.87 (3H, s, acetyl), 1.43-1.35 (1H, m, 1-H), 1.02 (1H, td, *J* 8.6 and 5.4 Hz, 3-H<sub>A</sub>), 0.84 (1H, dd, *J* 11.4 and 5.4 Hz, 3-H<sub>B</sub>);  $\delta_{\text{C}}$  (125 MHz, CDCl<sub>3</sub>): 169.9 (C=O), 159.8 (phenyl C-3), 140.0 (phenyl C-1), 129.5 (phenyl C-5), 121.3 (phenyl C-6), 114.9 (phenyl C-2), 111.6 (phenyl C-4), 55.3 (OMe), 39.7 (cyclopropylmethyl C-1), 23.4 (acetyl), 20.8 (C-2), 18.5 (C-1), 8.6 (C-3); HRMS found MNa<sup>+</sup> 242.1146. C<sub>13</sub>H<sub>17</sub>NO<sub>2</sub> requires *MNa*, 242.1151.

**1-[(1*aR*\*,7*bS*\*)-6-methoxy-1,1*a*,2,7*b*-tetrahydro-3*H*-cyclopropa[*c*]quinolin-3-yl]ethanone (27)**

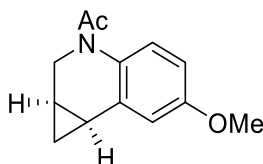

Acetamide derivative **S11** (95.0 mg, 0.43 mmol) was dissolved in MeCN (5 ml) then NBS (85.0 mg, 0.47 mmol) was added and the resulting solution stirred at rt for 4 h. The volatiles were removed under reduced pressure to give the crude brominated intermediate. This was then dissolved in toluene (2 ml) then added to a pressure vial. Then Pd(OAc)<sub>2</sub> (5.00 mg, 5 mol%), *rac*-BINAP (20.0 mg, 7.5 mol%) and NaO<sup>t</sup>Bu (83.0 mg, 0.86 mmol) were added sequentially, the pressure vial sealed then stirred at 100 °C for 18 h. The reaction mixture was cooled to rt then filtered through celite (eluting with DCM). The filtrate was concentrated under reduced pressure to give a crude material. This was then purified *via* column chromatography, eluting EtOAc–hexane 25:75 to give the *cyclised acetamide derivative 27* (38.0 mg, 41%) as a colourless oil. *R*<sub>f</sub> 0.31 (EtOAc–hexane 50:50).  $\nu_{\max}/\text{cm}^{-1}$ : 3004, 2920, 2836, 1651, 1502, 1385,

1265, 1215, 1139;  $\delta_{\text{H}}$  (500 MHz,  $\text{CDCl}_3$ ): 6.93 (1H, d,  $J$  8.7 Hz, 4-H), 6.87 (1H, d,  $J$  2.7 Hz, 7-H), 6.68 (1H, dd,  $J$  8.7 and 2.7 Hz, 5-H), 5.04 (1H, d,  $J$  12.5 Hz, 2- $\text{H}_\text{A}$ ), 3.81 (3H, s, OMe), 2.68 (1H, d,  $J$  12.5 Hz, 2- $\text{H}_\text{B}$ ), 2.12 (3H, s, acetyl), 1.93 (1H, td,  $J$  8.4 and 4.5 Hz, 7b-H), 1.84-1.78 (1H, m, 1a-H), 1.01 (1H, td,  $J$  8.4 and 5.6 Hz, 1- $\text{H}_\text{A}$ ), 0.61 (1H, dd,  $J$  10.0 and 5.0 Hz, 1- $\text{H}_\text{B}$ );  $\delta_{\text{C}}$  (125 MHz,  $\text{CDCl}_3$ ): 170.5 (C=O), 157.6 (C-6), 135.3 (C-3a), 129.4 (C-7a), 126.1 (C-4), 113.8 (C-7), 110.8 (C-5), 55.6 (OMe), 38.4 (C-2), 22.5 (acetyl  $\text{CH}_3$ ), 18.4 (C-1a), 15.2 (C-7b), 9.0 (C-1); HRMS found  $\text{MH}^+$  218.1172.  $\text{C}_{13}\text{H}_{15}\text{NO}_2$  requires  $\text{MH}$ , 218.1176.

**ethyl 2-[(1*R*\*,2*S*\*)-2-[(pyridine-2-carbonyl)amino]methyl]cyclopropyl]benzoate (28)**

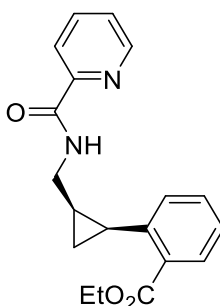

Prepared according to General procedure F, picolinamide derivative **S10** (200 mg, 1.14 mmol) and ethyl-2-iodobenzoate (345 mg, 1.25 mmol) gave a crude material. This was purified *via* column chromatography, eluting EtOAc–hexane 30:70 to give *arylated ester derivative 28* (146 mg, 40%,  $dr >95:<5$  by  $^1\text{H}$  NMR) as a colourless oil.  $R_f$  0.23 (EtOAc–hexane 40:60).  $\nu_{\text{max}}/\text{cm}^{-1}$ : 3382, 2981, 1712, 1669, 1519, 1488, 1449, 1291, 1253, 1132, 1076;  $\delta_{\text{H}}$  (500 MHz,  $\text{CDCl}_3$ ): 8.51 (1H, ddd,  $J$  4.8, 1.7 and 0.9 Hz, pyridinyl 6-H), 8.10 (1H, dt,  $J$  7.8 and 1.0 Hz, pyridinyl 3-H), 8.07 (1H, br. s, NH), 7.92 (1H, dd,  $J$  7.7 and 1.4 Hz, phenyl 6-H), 7.79 (1H, td,  $J$  7.8 and 1.7 Hz, pyridinyl 4-H), 7.44 (1H, td,  $J$  7.6 and 1.4 Hz, phenyl 4-H), 7.38 (1H, ddd,  $J$  7.8, 4.8 and 1.0 Hz, pyridinyl 5-H), 7.31-7.26 (2H, m, phenyl 3-H and phenyl 5-H), 4.39 (2H, qd,  $J$  7.1 and 1.4 Hz, ethyl 1- $\text{H}_2$ ), 3.34 (1H, dt,  $J$  14.0 and 6.5 Hz, cyclopropylmethyl 1- $\text{H}_\text{A}$ ), 2.85 (1H, ddd,  $J$  14.0, 8.3 and 4.4 Hz, cyclopropylmethyl 1- $\text{H}_\text{B}$ ), 2.69 (1H, dd,  $J$  15.4 and 8.3 Hz, cyclopropyl 1-H), 1.67-1.59 (1H, m, cyclopropyl 2-H), 1.38 (3H, t,  $J$  7.1 Hz, ethyl 2- $\text{H}_3$ ), 1.17 (1H, td,  $J$  8.3 and 5.5 Hz, cyclopropyl 3- $\text{H}_\text{A}$ ), 1.04 (1H, dd,  $J$  11.9 and 5.5 Hz, cyclopropyl 3- $\text{H}_\text{B}$ );  $\delta_{\text{C}}$  (125 MHz,  $\text{CDCl}_3$ ): 167.9 (C=O ester), 164.3 (C=O amide), 150.3 (pyridinyl C-2), 148.1 (pyridinyl C-6), 139.4 (phenyl C-2), 137.3 (pyridinyl C-4), 132.0 (phenyl C-4), 131.9

(phenyl C-1), 131.0 (phenyl C-6), 129.9 (phenyl C-5), 126.6 (phenyl C-3), 126.0 (pyridinyl C-5), 122.3 (pyridinyl C-3), 61.1 (ethyl C-1), 40.1 (cyclopropylmethyl C-1), 21.5 (cyclopropyl C-1), 18.9 (cyclopropyl C-2), 14.4 (ethyl C-2), 9.2 (cyclopropyl C-3); HRMS found  $MH^+$  325.1542.  $C_{19}H_{20}N_2O_3$  requires  $MH$ , 325.1547. The relative configuration was determined through NOESY (500 MHz,  $CDCl_3$ ). nOe observed between cyclopropyl 1-H and cyclopropyl 2-H and nOe observed between cyclopropylmethyl 1- $H_2$  and phenyl 3-H (500 MHz,  $CDCl_3$ ).

**(1a*R*\*,8b*S*\*)-1a,2,3,8b-tetrahydrocyclopropa[*d*][2]benzazepin-4(1*H*)-one (3)**

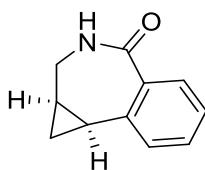

Water (4.73 ml) and HCl (1.08 ml, 37%) were added to a solution of arylated ester derivative **28** (140 mg, 0.43 mmol) in THF (15 ml). The reaction mixture was stirred at rt for 5 mins then zinc powder (419 mg, 6.45 mmol) was added portionwise over 30 mins. The resulting suspension was stirred at rt for 2 h. The reaction mixture was filtered through celite (eluting with THF) then the filtrate was basified with 5M NaOH solution and the resulting solution allowed to stir at rt for a further 18 h. This was then extracted with DCM (3 x 30 ml), dried ( $MgSO_4$ ), filtered and concentrated under reduced pressure to give a crude material. This was then purified *via* column chromatography, eluting EtOAc–hexane 90:10 to give *lactam derivative 3* (42.0 mg, 57%) as a white solid.  $R_f$  0.36 (EtOAc).  $\nu_{max}/cm^{-1}$ : 3272, 2995, 2850, 1643, 1598, 1455, 1359, 1153, 1023;  $\delta_H$  (500 MHz,  $CDCl_3$ ): 7.75 (1H, dd,  $J$  7.8 and 1.1 Hz, 5-H), 7.45-7.38 (2H, m, 7-H and 8-H), 7.30 (1H, td,  $J$  7.8 and 1.5 Hz, 6-H), 6.39 (1H, br. s, NH), 3.58 (1H, ddd,  $J$  14.9, 6.3 and 4.5 Hz, 2- $H_A$ ), 2.92-2.81 (1H, m, 2- $H_B$ ), 2.13 (1H, td,  $J$  8.7 and 5.3 Hz, 8b-H), 1.79-1.70 (1H, m, 1a-H), 1.11 (1H, ddd,  $J$  8.7, 7.9 and 5.3 Hz, 1- $H_A$ ), 0.78-0.70 (1H, m, 1- $H_B$ );  $\delta_C$  (125 MHz,  $CDCl_3$ ): 172.4 (C=O), 138.5 (C-8a), 133.2 (C-4a), 132.0 (C-7), 131.1 (C-8), 130.6 (C-5), 126.8 (C-6), 43.5 (C-2), 21.3 (C-1a), 18.3 (C-8b), 11.1 (C-1); HRMS found  $MH^+$  174.0907.  $C_{11}H_{11}NO$  requires  $MH$ , 174.0913.

***N*-[(1*R*\*,3*R*\*,4*R*\*)-1-azabicyclo[2.2.2]octan-3-yl]pyridine-2-carboxamide (**S12**)**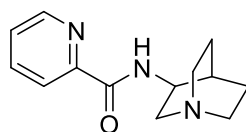

Prepared according to General procedure C, 3-aminoquinuclidine dihydrochloride (5.00 g, 25.1 mmol) gave a crude material. This was further purified by stirring in MTBE (60 ml) for 2 h and any solids were subsequently filtered off. The filtrate was concentrated under reduced pressure to give picolinamide derivative **S12**<sup>6</sup> (3.67 g, 63%) as a colourless oil. *R*<sub>f</sub> 0.45 (DCM–MeOH 90:10).  $\delta_{\text{H}}$  (500 MHz, CDCl<sub>3</sub>): 8.56 (1H, d, *J* 4.7 Hz, pyridinyl 6-H), 8.26 (1H, br. d, *J* 5.7 Hz, NH), 8.19 (1H, d, *J* 7.8 Hz, pyridinyl 3-H), 7.85 (1H, td, *J* 7.8 and 1.7 Hz, pyridinyl 4-H), 7.43 (1H, ddd, *J* 7.8, 4.7 and 1.2 Hz, pyridinyl 5-H), 4.20-4.14 (1H, m, 3-H), 3.44 (1H, ddd, *J* 14.2, 9.5 and 2.3 Hz, 2-H<sub>A</sub>), 3.02-2.95 (1H, m, 6-H<sub>A</sub>), 2.95-2.80 (3H, m, 6-H<sub>B</sub> and 7-H<sub>2</sub>), 2.68 (1H, ddd, *J* 14.2, 4.9 and 2.1 Hz, 2-H<sub>B</sub>), 2.07-2.03 (1H, m, 4-H), 1.86-1.80 (1H, m, 5-H<sub>A</sub>), 1.76-1.69 (2H, m, 8-H<sub>2</sub>), 1.57-1.48 (1H, m, 5-H<sub>B</sub>);  $\delta_{\text{C}}$  (125 MHz, CDCl<sub>3</sub>): 164.3 (C=O), 150.0 (pyridinyl C-2), 148.2 (pyridinyl C-6), 137.6 (pyridinyl C-4), 126.3 (pyridinyl C-5), 122.3 (pyridinyl C-3), 56.2 (C-2), 47.7 (C-6), 46.9 (C-7) 46.6 (C-3), 26.0 (C-8), 25.9 (C-4), 20.4 (C-5). All data is consistent with known literature values.<sup>6</sup>

***N*-[(1*R*\*,3*R*\*,4*S*\*,5*S*\*)-5-(3-methoxyphenyl)-1-azabicyclo[2.2.2]octan-3-yl]pyridine-2-carboxamide (**S13**)**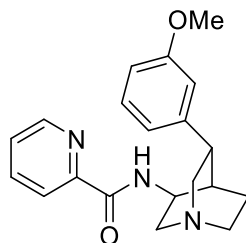

To a solution of picolinamide derivative **S12** (0.50 g, 2.16 mmol) and 3-iodoanisole (0.77 ml, 6.49 mmol) in DMF (10 ml) were added pivalic acid (242 mg, 2.38 mmol), Pd(OAc)<sub>2</sub> (73.0

mg, 15 mol%) and  $\text{Ag}_2\text{CO}_3$  (657 mg, 2.38 mmol). The resulting mixture was stirred and heated at 100 °C for 24 h. Then 5M NaOH (20 ml) was added and the resulting solution extracted with DCM (3 x 30 ml). The combined organic layers were dried ( $\text{MgSO}_4$ ), filtered and concentrated under reduced pressure to give a crude material. This was then purified *via* column chromatography, eluting DCM–sat.  $\text{NH}_3/\text{MeOH}$  95:5 to give *arylated derivative S13* (0.52 g, 71%, *dr* >95:<5 by  $^1\text{H}$  NMR) as a dark yellow oil.  $R_f$  0.29 (DCM–sat.  $\text{NH}_3/\text{MeOH}$  95:5).  $\nu_{\text{max}}/\text{cm}^{-1}$ : 3343, 2938, 2872, 1658, 1590, 1515, 1461, 1434, 1319, 1252, 1157, 1040;  $\delta_{\text{H}}$  (500 MHz,  $\text{CDCl}_3$ ): 8.19 (1H, ddd,  $J$  4.7, 1.7 and 0.9 Hz, pyridinyl 6-H), 7.96 (1H, dt,  $J$  7.8 and 1.2 Hz, pyridinyl 3-H), 7.81 (1H, br. d,  $J$  7.9 Hz, NH), 7.70 (1H, td,  $J$  7.8 and 1.7 Hz, pyridinyl 4-H), 7.27 (1H, ddd,  $J$  7.8, 4.7 and 1.2 Hz, pyridinyl 5-H), 7.18 (1H, t,  $J$  7.7 Hz, phenyl 5-H), 6.94 (1H, dd,  $J$  7.7 and 0.7 Hz, phenyl 6-H), 6.90 (1H, app. s, phenyl 2-H), 6.65 (1H, dd,  $J$  7.7 and 2.5 Hz, phenyl 4-H), 4.20-4.14 (1H, m, 3-H), 3.72 (3H, s, OMe), 3.52-3.36 (3H, m, 2- $\text{H}_A$  and 6- $\text{H}_2$ ), 3.10 (1H, t,  $J$  8.7 Hz, 5-H), 2.94-2.86 (2H, m, 7- $\text{H}_2$ ), 2.78 (1H, dd,  $J$  14.1 and 4.6 Hz, 2- $\text{H}_B$ ), 2.56 (1H, dt,  $J$  5.7 and 3.0 Hz, 4-H), 1.93-1.77 (2H, m, 8- $\text{H}_2$ );  $\delta_{\text{C}}$  (125 MHz,  $\text{CDCl}_3$ ): 163.7 (C=O), 160.2 (phenyl C-3), 149.6 (pyridinyl C-2), 147.5 (pyridinyl C-6), 144.9 (phenyl C-1), 137.0 (pyridinyl C-4), 130.0 (phenyl C-5), 125.8 (pyridinyl C-5), 121.7 (pyridinyl C-3), 119.6 (phenyl C-6), 112.7 (phenyl C-2), 111.4 (phenyl C-4), 57.0 (C-2), 55.2 (OMe), 52.0 (C-6), 46.7 (C-3), 46.2 (C-7), 38.3 (C-5), 32.7 (C-4), 28.8 (C-8); HRMS found  $\text{MH}^+$  338.1879.  $\text{C}_{20}\text{H}_{23}\text{N}_3\text{O}_2$  requires *MH*, 338.1863.

***N*-[(1*R*\*,3*R*\*,4*S*\*,5*S*\*)-5-(3-methoxyphenyl)-1-azabicyclo[2.2.2]octan-3-yl]acetamide (29)**

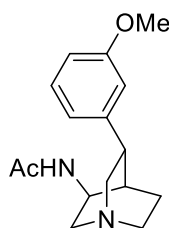

Arylated derivative **S13** (0.52 g, 1.54 mmol) was suspended in water (40 ml) to which HCl (5 ml, 37%) was added slowly with stirring. The reaction mixture was stirred for 5 mins at rt then zinc powder (1.50 g, 23.1 mmol) was added slowly. The reaction mixture was left to stir at rt for 16 h. Then DCM (70 ml) and 5M NaOH (100 ml) were added slowly at 0 °C. The mixture

was filtered through celite, with the celite pad being subsequently washed with water (30 ml) and DCM (30 ml). The combined filtrate was extracted with DCM (3 x 50 ml), organic layers combined, dried (MgSO<sub>4</sub>), filtered and concentrated under reduced pressure to give the crude amine intermediate. This amine intermediate (0.35 g, 1.51 mmol) was dissolved in THF (20 ml) then NaOH (60.0 mg, 1.51 mmol) in water (5 ml) was added at rt. Ac<sub>2</sub>O (0.18 ml, 1.89 mmol) was added and the reaction mixture stirred at rt for a further 1 h. 5M NaOH was added to basify the solution to pH 13. This solution was then extracted with DCM (3 x 40 ml), organic layers combined, dried (MgSO<sub>4</sub>), filtered and concentrated under reduced pressure to give a crude material. This was then purified *via* column chromatography, eluting DCM–sat. NH<sub>3</sub>/MeOH 95:5 to give *acetamide derivative 29* (306 mg, 74%) as a colourless oil. *R<sub>f</sub>* 0.52 (DCM–sat. NH<sub>3</sub>/MeOH 90:10).  $\nu_{\max}/\text{cm}^{-1}$ : 3291, 3068, 2937, 2870, 2835, 1644, 1546, 1433, 1257, 1043;  $\delta_{\text{H}}$  (500 MHz, CDCl<sub>3</sub>): 7.30 (1H, t, *J* 8.0 Hz, phenyl 5-H), 6.96 (1H, dd, *J* 8.0 and 0.7 Hz, phenyl 6-H), 6.88 (1H, s, phenyl 2-H), 6.78 (1H, dd, *J* 8.0 and 2.5 Hz, phenyl 4-H), 5.06 (1H, br. d, *J* 7.2 Hz, NH), 3.98-3.91 (1H, m, 3-H), 3.81 (3H, s, OMe), 3.44-3.25 (3H, m, 2-H<sub>A</sub> and 6-H<sub>2</sub>), 3.05 (1H, t, *J* 8.6 Hz, 5-H), 2.91-2.77 (2H, m, 7-H<sub>2</sub>), 2.57 (1H, ddd, *J* 14.2, 4.9 and 2.1 Hz, 2-H<sub>B</sub>), 2.44-2.41 (1H, m, 4-H), 1.87-1.78 (1H, m, 8-H<sub>A</sub>), 1.77-1.69 (1H, m, 8-H<sub>B</sub>), 1.42 (3H, s, acetyl);  $\delta_{\text{C}}$  (125 MHz, CDCl<sub>3</sub>): 169.4 (acetyl C=O), 160.3 (phenyl C-3), 145.7 (phenyl C-1), 130.0 (phenyl C-5), 119.0 (phenyl C-6), 113.5 (phenyl C-2), 111.5 (phenyl C-4), 56.7 (C-2), 55.4 (OMe), 51.8 (C-6), 46.9 (C-3), 46.2 (C-7), 38.2 (C-5), 32.7 (C-4), 28.6 (C-8), 23.0 (acetyl CH<sub>3</sub>); HRMS found MH<sup>+</sup> 275.1762. C<sub>16</sub>H<sub>22</sub>N<sub>2</sub>O<sub>2</sub> requires *MH*, 275.1754.

**(2*R*\*,4*aS*\*,5*S*\*,10*R*\*,11*aS*\*)-7-methoxy-10-methyl-1,3,4,4*a*,5,10,11,11*a*-octahydro-2,5-methanobenzo[*e*]pyrido[3,4-*b*]azepine (30)**

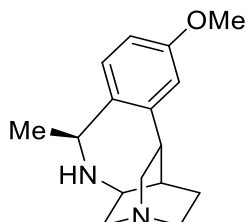

Acetamide derivative **29** (221 mg, 0.81 mmol) was dissolved in MeCN (10 ml) and POCl<sub>3</sub> (0.76 ml, 8.10 mmol) was added dropwise at rt. The reaction mixture was stirred and heated to

100 °C for 18 h. The reaction mixture was cooled to rt and all volatiles removed under reduced pressure. This residue was dissolved in DCM (10 ml), then water (5 ml) and 5M NaOH were added to basify the reaction mixture. This was then extracted with DCM (3 x 50 ml), organic layers combined, dried (MgSO<sub>4</sub>), filtered and concentrated under reduced pressure to give the crude imine intermediate. This crude intermediate (140 mg, 0.55 mmol) was dissolved in MeOH (5 ml) and NaBH<sub>4</sub> (42.0 mg, 1.10 mmol) was added at rt. The resulting solution was allowed to stir at rt for 1 h. Then 1M HCl (15 ml) was added to quench the reaction, followed by 2M NaOH to basify the solution to pH 12. Then this mixture was extracted with DCM (3 x 30 ml), organic layers combined, dried (MgSO<sub>4</sub>), filtered and concentrated under reduced pressure to give a crude material (*dr* 68:32 by <sup>1</sup>H NMR). This was then purified *via* column chromatography, eluting DCM–sat. NH<sub>3</sub>/MeOH 95:5 → 90:10 to give the *cyclised amine derivative 30* (112 mg, 54%, *dr* 84:16 by <sup>1</sup>H NMR) as a colourless oil. *R*<sub>f</sub> 0.25 (DCM–sat. NH<sub>3</sub>/MeOH 95:5).  $\nu_{\max}/\text{cm}^{-1}$ : 3251, 2947, 2909, 2783, 1602, 1502, 1238, 1038;  $\delta_{\text{H}}$  (500 MHz, CDCl<sub>3</sub>): 7.13 (1H, d, *J* 8.6 Hz, 9-H), 6.69–6.62 (2H, m, 6-H and 8-H), 4.19 (1H, q, *J* 6.7 Hz, 10-H), 3.78 (3H, s, OMe), 3.39–3.25 (2H, m, 11a-H and 12-H<sub>A</sub>), 3.06–2.80 (5H, m, 12-H<sub>B</sub>, 5-H, 1-H<sub>A</sub> and 3-H<sub>2</sub>), 2.63 (1H, d, *J* 13.8 Hz, 1-H<sub>B</sub>), 2.55 (1H, t, *J* 4.5 Hz, 4a-H), 1.76–1.56 (3H, m, 4-H<sub>2</sub> and NH), 1.50 (3H, d, *J* 6.7 Hz, methyl);  $\delta_{\text{C}}$  (125 MHz, CDCl<sub>3</sub>): 157.8 (C-7), 144.5 (C-5a), 138.3 (C-9a), 126.8 (C-9), 116.4 (C-6), 110.3 (C-8), 57.3 (C-1), 55.9 (C-12), 55.4 (OMe), 52.0 (C-11a), 49.9 (C-10), 46.6 (C-3), 42.7 (C-5), 29.2 (C-4a), 24.4 (C-4), 22.4 (methyl CH<sub>3</sub>); HRMS found MH<sup>+</sup> 259.1808. C<sub>16</sub>H<sub>22</sub>N<sub>2</sub>O requires *MH*, 259.1805. The relative configuration was determined through NOESY (500 MHz, CDCl<sub>3</sub>). nOe observed between 10-H and 4a-H (500 MHz, CDCl<sub>3</sub>).

**1-[(2*R*\*,4*aS*\*,5*S*\*,10*aR*\*)-7-methoxy-1,3,4,4*a*,5,10*a*-hexahydro-10*H*-2,5-methanobenzo[*b*][1,7]naphthridin-10-yl]ethanone (S14)**

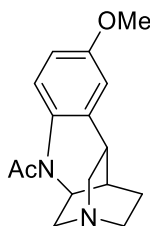

Acetamide derivative **29** (100 mg, 0.36 mmol) was dissolved in MeCN (5 ml) and NBS (65.0 mg, 0.36 mmol) was added. The reaction mixture was left to stir at rt for 18 h. The solvent was removed under reduced pressure to give the crude *p*-bromo intermediate. This crude intermediate (82.0 mg, 0.23 mmol) was dissolved in toluene (5 ml) and Pd(OAc)<sub>2</sub> (3.00 mg, 5 mol%), *rac*-BINAP (11.0 mg, 7.5 mol%) and Cs<sub>2</sub>CO<sub>3</sub> (152 mg, 0.47 mmol) were added sequentially. The reaction mixture was heated at 100 °C for 24 h then allowed to cool to rt. The resulting mixture was filtered through celite and concentrated under reduced pressure to give a crude material. This was then purified *via* column chromatography, eluting DCM–sat. NH<sub>3</sub>/MeOH 95:5 to give the *cyclised acetamide derivative S14* (40.0 mg, 41%) as a pale-yellow oil. *R*<sub>f</sub> 0.61 (DCM–sat. NH<sub>3</sub>/MeOH 90:10). *v*<sub>max</sub>/cm<sup>-1</sup>: 2934, 2871, 1634, 1494, 1243, 1038; δ<sub>H</sub> (500 MHz, CDCl<sub>3</sub>): 6.76 (1H, dd, *J* 9.0 and 2.0 Hz, 8-H), 6.60 (1H, d, *J* 2.0 Hz, 6-H), 3.79 (3H, s, OMe), 3.37-3.26 (2H, m, 1-H<sub>A</sub> and 11-H<sub>A</sub>), 2.94-2.85 (2H, m, 5-H and 3-H<sub>A</sub>), 2.78-2.70 (1H, m, 3-H<sub>B</sub>), 2.60 (1H, d, *J* 13.3 Hz, 1-H<sub>B</sub>), 2.47-2.42 (1H, m, 11-H<sub>B</sub>), 2.33 (3H, s, acetyl), 1.91 (1H, app. s, 4a-H), 1.84-1.72 (2H, m, 4-H<sub>2</sub>); δ<sub>C</sub> (125 MHz, CDCl<sub>3</sub>): 170.0 (C=O), 156.8 (C-7), 135.6 (C-9a), 127.5 (C-5a), 125.3 (C-9), 113.3 (C-6), 112.2 (C-8), 57.0 (C-1), 55.6 (OMe), 53.1 (C-11), 46.3 (C-3), 34.6 (C-5), 26.2 (C-4a), 24.8 (acetyl CH<sub>3</sub>), 23.0 (C-4); HRMS found MH<sup>+</sup> 273.1606. C<sub>16</sub>H<sub>20</sub>N<sub>2</sub>O<sub>2</sub> requires *MH*, 273.1598. 9-H and 10a-H not observed by <sup>1</sup>H NMR and C-10a not observed by <sup>13</sup>C NMR.

**(2*R*\*,4*aS*\*,5*S*\*,10*aR*\*)-7-methoxy-3,4,4*a*,5,10,10*a*-hexahydro-1*H*-2,5-methanobenzo[*b*][1,7]naphthridine (**31**)**

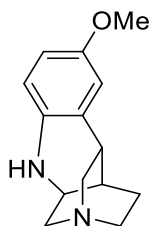

Cyclised acetamide derivative **S14** (40.0 mg, 0.15 mmol) was dissolved in 1:1 HCl–EtOH (10 ml) and stirred at 80 °C for 18 h. The reaction mixture was allowed to cool to rt then concentrated under reduced pressure to give the *amine derivative 31* (36.0 mg, 89%) as an off-white solid. *R*<sub>f</sub> 0.37 (DCM–sat. NH<sub>3</sub>/MeOH 90:10). *v*<sub>max</sub>/cm<sup>-1</sup>: 3151, 3052, 1595, 1238, 1016;



$\delta_{\text{H}}$  (500 MHz, MeOD): 7.33 (1H, d,  $J$  8.7 Hz, 9-H), 7.08 (1H, d,  $J$  8.7 Hz, 8-H), 7.05 (1H, s, 6-H), 4.56-4.48 (1H, m, 10a-H), 4.00-3.93 (1H, m, 1-H<sub>A</sub>), 3.86 (4H, app. s, OMe and 11-H<sub>A</sub>), 3.64-3.58 (1H, m, 5-H), 3.52-3.44 (1H, m, 3-H<sub>A</sub>), 3.40-3.32 (2H, m, 1-H<sub>B</sub> and 3-H<sub>B</sub>), 3.27 (1H, d,  $J$  12.3 Hz, 11-H<sub>B</sub>), 2.64 (1H, app. s, 4a-H), 2.34-2.24 (2H, m, 4-H<sub>2</sub>);  $\delta_{\text{C}}$  (125 MHz, MeOD): 162.1 (C-7), 136.6 (C-9a), 126.1 (C-9), 119.9 (C-5a), 117.2 (C-8), 115.8 (C-6), 56.4 (OMe), 54.7 (C-11), 48.8 (C-1), 47.0 (C-3), 46.8 (C-10a), 30.6 (C-5), 23.9 (C-4a), 20.3 (C-4); HRMS found  $\text{MH}^+$  231.1495.  $\text{C}_{14}\text{H}_{18}\text{N}_2\text{O}$  requires  $\text{MH}$ , 231.1492. The product was isolated as the HCl salt.

**(1*R*\*,3*S*\*,4*R*\*)-3-(2-bromophenyl)-2-(4-methoxyphenyl)-2-azabicyclo[2.2.2]octan-5-one (S15)**

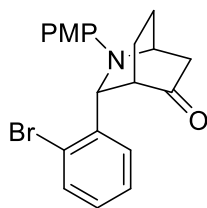

*p*-anisidine (2.00 g, 16.2 mmol), proline (0.19 g, 30 mol%), 2-cyclohexenone (1.56 ml, 16.2 mmol) and 2-bromobenzaldehyde (1.00 g, 5.41 mmol) were dissolved in MeCN–H<sub>2</sub>O 9:1 (15 ml) at rt. The reaction mixture was then stirred at 35 °C for 3 days. The mixture was filtered through celite, eluting with EtOAc. The filtrate was diluted with EtOAc (20 ml) and subsequently washed with water (2 x 40 ml). The aqueous washings were then back extracted with EtOAc (3 x 30 ml), organic layers combined, dried (MgSO<sub>4</sub>), filtered and concentrated under reduced pressure to give a crude material (*dr* 80:20 by <sup>1</sup>H NMR). This was then purified *via* column chromatography, eluting EtOAc–hexane 15:85 to give *bicyclic ketone derivative S15* (1.08 g, 53%, *dr* >95:<5 by <sup>1</sup>H NMR) as a yellow oil.  $R_f$  0.30 (EtOAc–hexane 20:80).  $\nu_{\text{max}}/\text{cm}^{-1}$ : 3062, 2934, 2868, 2832, 1732, 1508, 1460, 1440, 1293, 1240, 1180, 1110, 1083;  $\delta_{\text{H}}$  (500 MHz, CDCl<sub>3</sub>): 7.56 (1H, dd,  $J$  7.9 and 1.1 Hz, bromophenyl 3-H), 7.35 (1H, dd,  $J$  7.9 and 1.7 Hz, bromophenyl 6-H), 7.20 (1H, td,  $J$  7.9 and 1.1 Hz, bromophenyl 5-H), 7.10 (1H, td,  $J$  7.9 and 1.7 Hz, bromophenyl 4-H), 6.76 (2H, d,  $J$  9.2 Hz, methoxyphenyl 3,5-H), 6.56 (2H, d,  $J$  9.2 Hz, methoxyphenyl 2,6-H), 4.90 (1H, d,  $J$  1.8 Hz, 3-H), 4.48-4.44 (1H, m, 1-H), 3.71

(3H, s, OMe), 2.88-2.81 (2H, m, 4-H and 6-H<sub>A</sub>), 2.51 (1H, dd, *J* 18.8 and 2.2 Hz, 6-H<sub>B</sub>), 2.24-2.17 (2H, m, 7-H<sub>A</sub> and 8-H<sub>A</sub>), 2.03-1.97 (1H, m, 8-H<sub>B</sub>), 1.82-1.77 (1H, m, 7-H<sub>B</sub>);  $\delta_C$  (125 MHz, CDCl<sub>3</sub>): 212.1 (C-5), 152.6 (methoxyphenyl C-4), 141.9 (methoxyphenyl C-1), 140.2 (bromophenyl C-1), 133.5 (bromophenyl C-3), 129.3 (bromophenyl C-4), 128.2 (bromophenyl C-5), 128.0 (bromophenyl C-6), 122.3 (bromophenyl C-2), 115.4 (methoxyphenyl C<sub>2</sub>-2,6), 114.9 (methoxyphenyl C<sub>2</sub>-3,5), 65.2 (C-3), 55.7 (OMe), 50.6 (C-1), 49.4 (C-4), 46.1 (C-6), 22.7 (C-7), 22.3 (C-8); HRMS found MH<sup>+</sup> 388.0730. C<sub>20</sub>H<sub>20</sub>BrNO<sub>2</sub> requires *MH*, 388.0730. The relative configuration was determined through NOESY (500 MHz, CDCl<sub>3</sub>). nOe observed between 3-H and 8-H<sub>A</sub> and bromophenyl 6-H and 6-H<sub>A</sub>.

***tert*-butyl *N*-[(1*R*\*,3*S*\*,4*S*\*,5*R*\*)-3-(2-bromophenyl)-2-(4-methoxyphenyl)-2-azabicyclo[2.2.2]octan-5-yl]carbamate (32)**

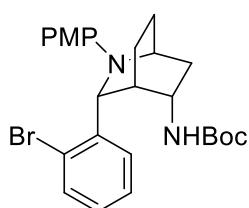

Bicyclic ketone **S15** (1.02 g, 2.64 mmol) was dissolved in sat. NH<sub>3</sub>/MeOH (50 ml) and Ti(O<sup>*i*</sup>Pr)<sub>4</sub> (1.59 ml, 5.27 mmol) was added at rt. The solution was allowed to stir for 18 h at rt, then cooled to 0 °C and NaBH<sub>4</sub> (150 mg, 3.96 mmol) was added portionwise. The resulting reaction mixture was left to stir at rt for 2 h. The mixture was concentrated under reduced pressure and the resulting residue was dissolved in EtOAc (30 ml) and brine (30 ml) was added with vigorous stirring. The phases were separated and the aqueous phase was then extracted with EtOAc (3 x 30 ml). The organic layers were combined, dried (MgSO<sub>4</sub>), filtered and concentrated under reduced pressure to give the crude amine intermediate. This intermediate was dissolved in THF (20 ml) and the solution was basified with 2M NaOH. Then Boc<sub>2</sub>O (1.73 g, 7.92 mmol) was added and the resulting mixture was allowed to stir at rt for 4 h. Water (20 ml) was added and the mixture was then extracted with EtOAc (3 x 30 ml). The organic layers were combined, dried (MgSO<sub>4</sub>), filtered and concentrated under reduced pressure to give a crude material. This was purified *via* column chromatography, eluting EtOAc–hexane 10:90 to

give *carbamate derivative 32* (311 mg, 25%, *dr* 74:26 by  $^1\text{H}$  NMR) as a colourless oil.  $R_f$  0.54 (EtOAc–hexane 20:80).  $\nu_{\text{max}}/\text{cm}^{-1}$ : 3285, 2937, 2865, 1694, 1510, 1346, 1270, 1225, 1190, 1081;  $\delta_{\text{H}}$  (500 MHz,  $\text{CDCl}_3$ ): 7.64–7.57 (3H, m, bromophenyl 3-H and bromophenyl 6- $\text{H}^{\text{maj}}$ ), 7.57–7.51 (1H, m, bromophenyl 6- $\text{H}^{\text{min}}$ ), 7.29 (1H, td,  $J$  7.6 and 1.0 Hz, bromophenyl 5- $\text{H}^{\text{maj}}$ ), 7.23 (1H, td,  $J$  7.6 and 1.0 Hz, bromophenyl 5- $\text{H}^{\text{min}}$ ), 7.14 (1H, td,  $J$  7.6 and 1.6 Hz, bromophenyl 4- $\text{H}^{\text{maj}}$ ), 7.11 (1H, td,  $J$  7.6 and 1.6 Hz, bromophenyl 4- $\text{H}^{\text{min}}$ ), 6.76–6.70 (4H, m, methoxyphenyl 3,5-H), 6.51–6.43 (4H, m, methoxyphenyl 2,6-H), 4.71 (2H, d,  $J$  6.2 Hz, NH), 4.56 (2H, d,  $J$  2.2 Hz, 3-H), 4.08–4.04 (1H, m, 1- $\text{H}^{\text{maj}}$ ), 4.01–3.97 (1H, m, 1- $\text{H}^{\text{min}}$ ), 3.80–3.73 (2H, m, 5-H), 3.71 (3H, s,  $\text{OMe}^{\text{maj}}$ ), 3.70 (3H, s,  $\text{OMe}^{\text{min}}$ ), 2.95–2.91 (2H, m, 4-H), 2.42–2.35 (1H, m, 6- $\text{H}_A^{\text{maj}}$ ), 2.24–2.16 (1H, m, 6- $\text{H}_A^{\text{min}}$ ), 2.12–2.03 (2H, m, 7- $\text{H}_A$ ), 1.82–1.70 (6H, m, 6- $\text{H}_B$  and 8- $\text{H}_2$ ), 1.60–1.54 (2H, m, 7- $\text{H}_B$ , overlap with residual water peak), 1.45 (9H, s,  $\text{tBu}^{\text{min}}$ ), 1.26 (9H, s,  $\text{tBu}^{\text{maj}}$ );  $\delta_{\text{C}}$  (125 MHz,  $\text{CDCl}_3$ ): 155.5 (Boc C=O $^{\text{min}}$ ), 154.9 (Boc C=O $^{\text{maj}}$ ), 151.9 (methoxyphenyl C-4 $^{\text{min}}$ ), 151.7 (methoxyphenyl C-4 $^{\text{maj}}$ ), 142.8 (methoxyphenyl C-1 $^{\text{maj}}$ ), 142.2 (methoxyphenyl C-1 $^{\text{min}}$ ), 140.5 (bromophenyl C-1), 134.2 (bromophenyl C-3 $^{\text{maj}}$ ), 133.3 (bromophenyl C-3 $^{\text{min}}$ ), 129.0 (bromophenyl C-4 $^{\text{min}}$ ), 128.7 (bromophenyl C-4 $^{\text{maj}}$ ), 128.5 (bromophenyl C-6), 127.9 (bromophenyl C-5 $^{\text{maj}}$ ), 127.5 (bromophenyl C-5 $^{\text{min}}$ ), 122.1 (bromophenyl C-2), 114.8 (methoxyphenyl C $_2$ -3,5 $^{\text{maj}}$ ), 114.7 (methoxyphenyl C $_2$ -3,5 $^{\text{min}}$ ), 113.9 (methoxyphenyl C $_2$ -2,6), 78.7 (C $_1$   $\text{tBu}$ ), 65.4 (C-3), 55.7 ( $\text{OMe}^{\text{maj}}$ ), 55.6 ( $\text{OMe}^{\text{min}}$ ), 48.3 (C-5 $^{\text{min}}$ ), 47.5 (C-5 $^{\text{maj}}$ ), 46.8 (C-1 $^{\text{min}}$ ), 46.2 (C-1 $^{\text{maj}}$ ), 36.6 (C-6), 35.2 (C-4), 28.5 (C $_3$   $\text{tBu}^{\text{min}}$ ), 28.2 (C $_3$   $\text{tBu}^{\text{maj}}$ ), 26.0 (C-8 $^{\text{min}}$ ), 25.7 (C-8 $^{\text{maj}}$ ), 22.6 (C-7 $^{\text{min}}$ ), 21.9 (C-7 $^{\text{maj}}$ ); HRMS found  $\text{MH}^+$  489.1583.  $\text{C}_{25}\text{H}_{31}\text{BrN}_2\text{O}_3$  requires  $\text{MH}$ , 489.1570. The relative configuration of the major diastereomer was determined through NOESY (500 MHz,  $\text{CDCl}_3$ ). nOe observed between 5-H and 8- $\text{H}_A$ .

***tert*-butyl (3*R*\*,4*aR*\*,9*S*\*,9*aS*\*)-11-(4-methoxyphenyl)-2,3,4,4*a*,9,9*a*-hexahydro-3,9-epiminoacridine-10(1*H*)-carboxylate (33)**

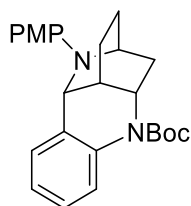

$\text{Pd}(\text{OAc})_2$  (4.00 mg, 5 mol%), *rac*-BINAP (16.0 mg, 7.5 mol%) and NaO<sup>t</sup>Bu (63.0 mg, 0.66 mmol) were added to a solution of carbamate derivative **32** (160 mg, 0.33 mmol) in toluene (10 ml) at rt. The reaction mixture was then stirred and heated at 100 °C for 24 h, allowed to cool to rt and then filtered through celite. The filtrate was concentrated under reduced pressure to give a crude material. This was then purified *via* column chromatography, eluting EtOAc–hexane 5:95 to give the *cyclised carbamate derivative* **33** (45.0 mg, 32%, *dr* >95:<5 by <sup>1</sup>H NMR) as a colourless oil.  $R_f$  0.58 (EtOAc–hexane 20:80).  $\nu_{\text{max}}/\text{cm}^{-1}$ : 2990, 2934, 2858, 1692, 1509, 1328, 1273, 1192, 1078;  $\delta_{\text{H}}$  (500 MHz,  $\text{CDCl}_3$ ): 7.97 (1H, d,  $J$  8.4 Hz, 5-H), 7.38 (1H, dd,  $J$  7.6 and 1.3 Hz, 8-H), 7.21–7.17 (1H, m, 6-H), 7.00 (2H, d,  $J$  9.1 Hz, methoxyphenyl 2,6-H), 6.95 (1H, td,  $J$  7.6 and 0.9 Hz, 7-H), 6.84 (2H, d,  $J$  9.1 Hz, methoxyphenyl 3,5-H), 4.65–4.59 (1H, m, 3-H), 4.54 (1H, d,  $J$  2.3 Hz, 9-H), 3.77 (3H, s, OMe), 3.69–3.64 (1H, m, 4a-H), 2.27 (1H, ddd,  $J$  13.9, 9.9 and 2.6 Hz, 4-H<sub>A</sub>), 2.00–1.92 (2H, m, 9a-H and 2-H<sub>A</sub>), 1.87 (1H, ddd,  $J$  13.9, 6.5 and 3.4 Hz, 4-H<sub>B</sub>), 1.83–1.69 (2H, m, 2-H<sub>B</sub> and 1-H<sub>A</sub>), 1.57 (9H, s, <sup>t</sup>Bu), 1.45–1.36 (1H, m, 1-H<sub>B</sub>);  $\delta_{\text{C}}$  (125 MHz,  $\text{CDCl}_3$ ): 153.5 (Boc C=O), 152.2 (methoxyphenyl C-4), 143.5 (methoxyphenyl C-1), 135.9 (C-4b), 131.5 (C-8a), 128.5 (C-8), 127.6 (C-6), 123.2 (C-5), 122.6 (C-7), 116.4 (methoxyphenyl C<sub>2</sub>-2,6), 114.9 (methoxyphenyl C<sub>2</sub>-3,5), 81.4 (C<sub>1</sub> <sup>t</sup>Bu), 55.9 (OMe), 55.3 (C-9), 48.8 (C-3), 46.5 (C-4a), 36.9 (C-4), 30.9 (C-9a), 28.6 (C<sub>3</sub> <sup>t</sup>Bu), 21.3 (C-2), 21.2 (C-1); HRMS found  $\text{MH}^+$  407.2338.  $\text{C}_{25}\text{H}_{30}\text{N}_2\text{O}_3$  requires *MH*, 407.2329. Confirmation of the relative configuration was determined through NOESY (500 MHz,  $\text{CDCl}_3$ ). nOe observed between 1-H<sub>B</sub> and 4a-H.

## Scaffold and Virtual Library Analysis

### List of Scaffolds Prepared Including Novelty Assessment

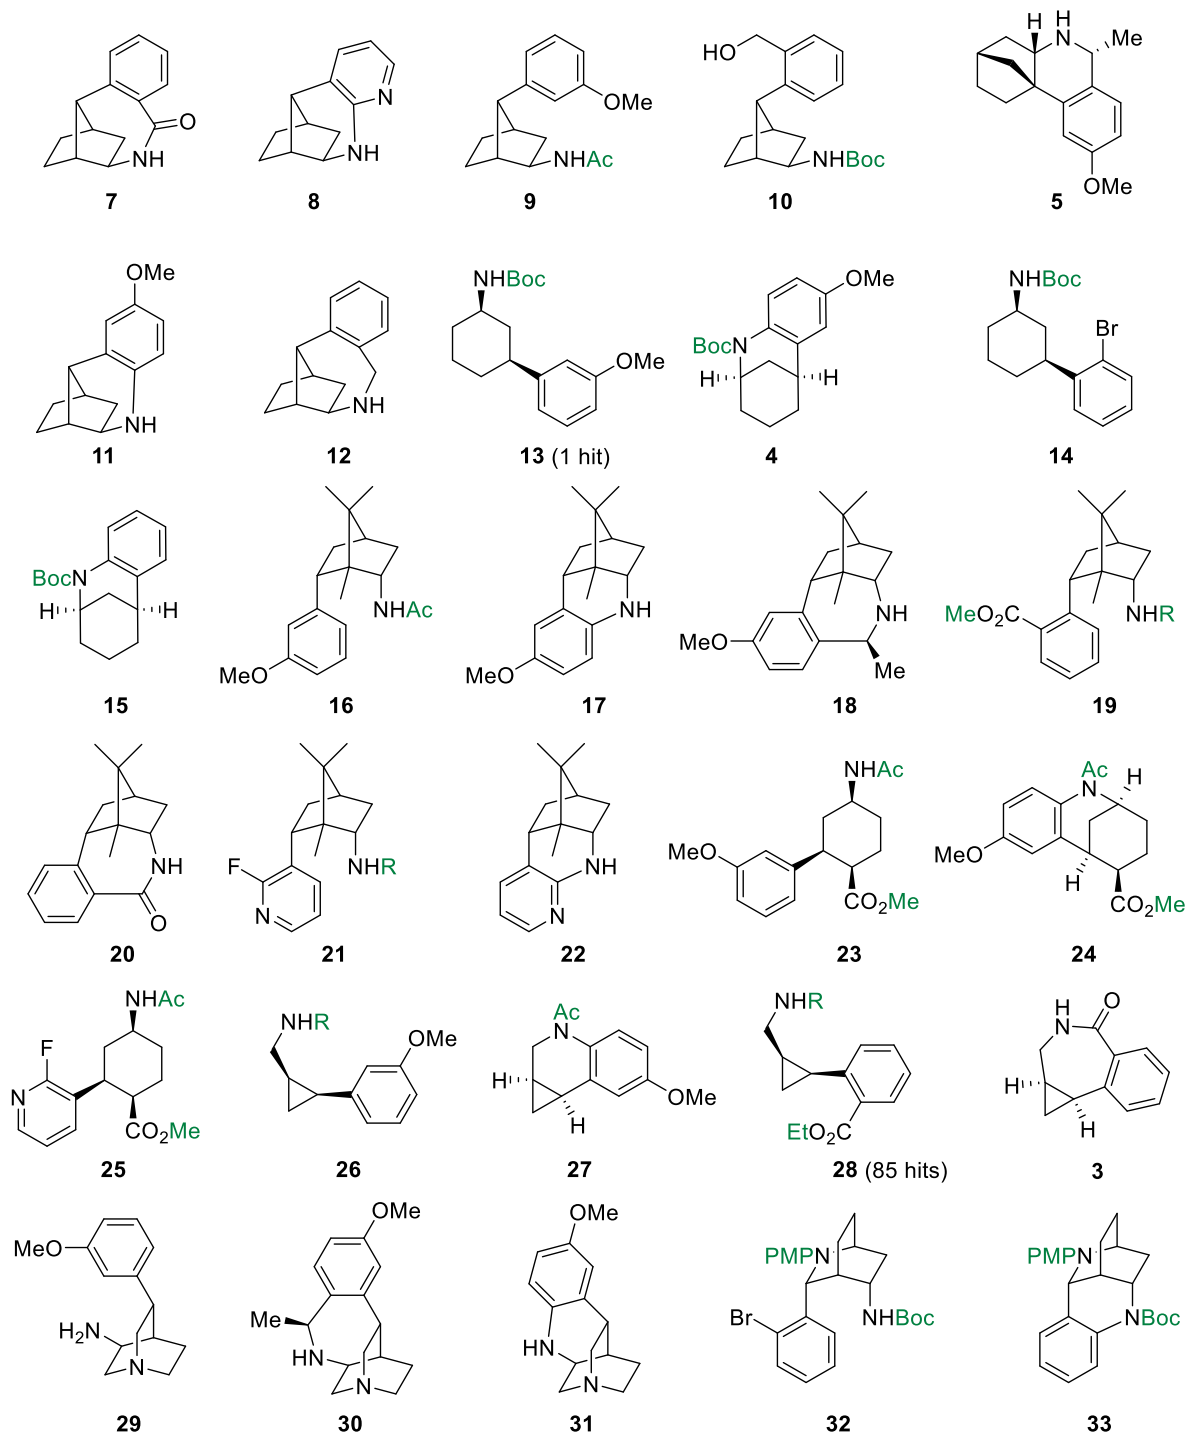

**Figure S1:** The 30 scaffolds prepared through this unified synthetic approach. The deprotected frameworks (black) are indicated. Number of hits from novelty assessment are shown in brackets where appropriate. R = 2-pyridylcarbonyl.

## Scaffold Diversity Assessment

A full version of the hierarchical scaffold tree highlighted in Figure 1 is shown below, including structures of the frameworks at each level of hierarchy.<sup>7</sup>

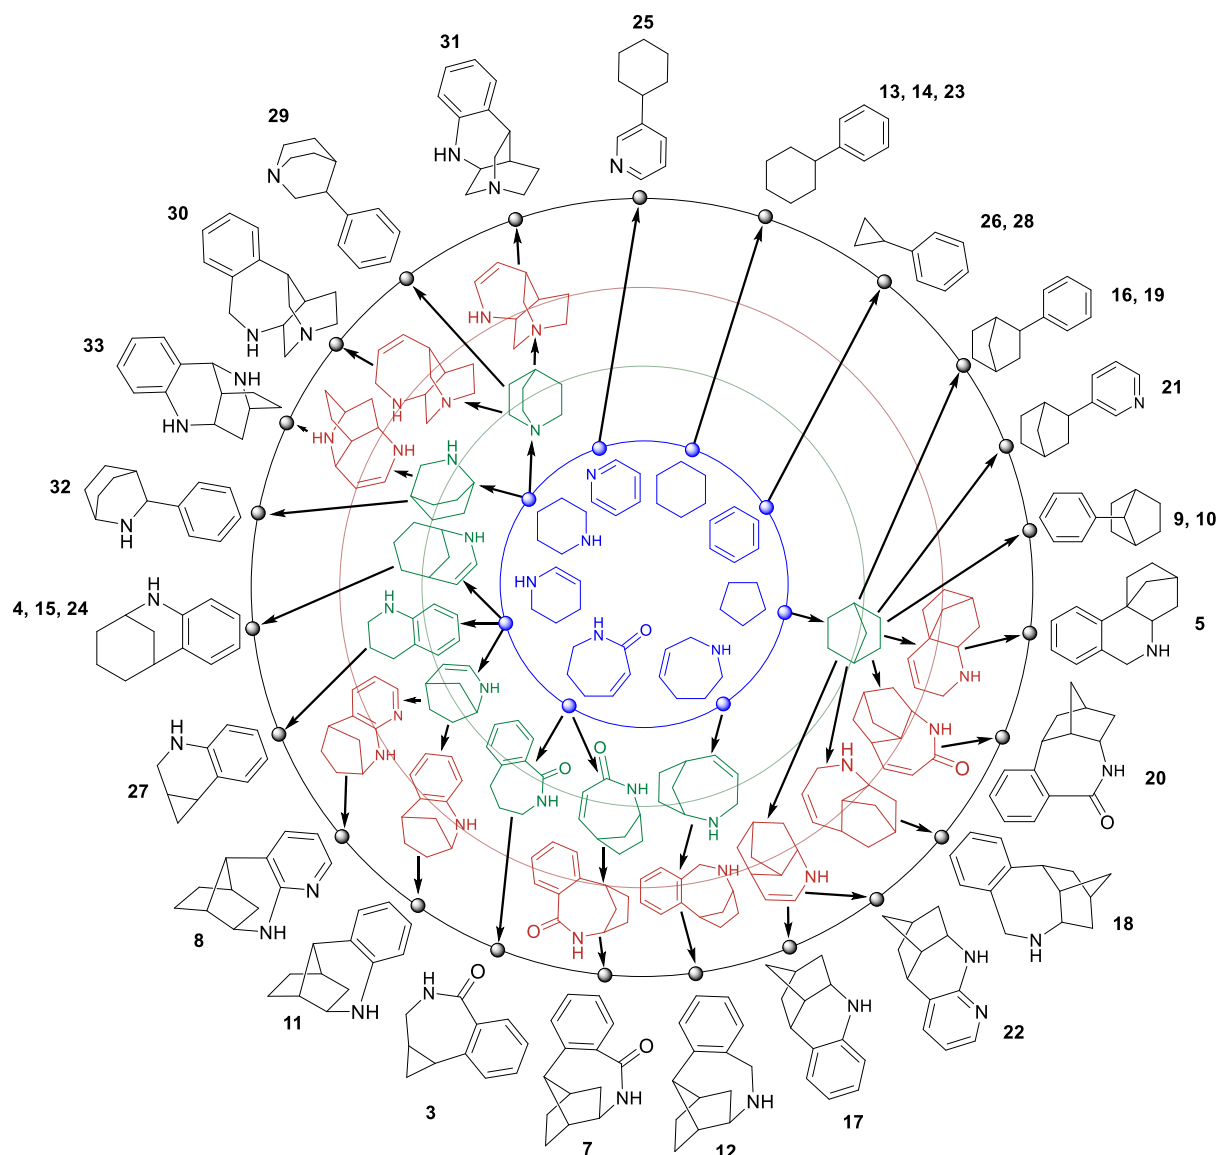

**Figure S2:** Hierarchical scaffold tree with structures. The twenty-three frameworks (black) at the graph-node-bond level are related hierarchically to eight monocyclic parent (blue) frameworks through iterative removal of rings (red  $\rightarrow$  green). The corresponding scaffolds relating to each framework at the graph-node level are numbered accordingly.

### Scaffold Molecular Property Assessment

Computational assessment of the molecular weight and AlogP of the deprotected scaffold library was performed using LLAMA<sup>8</sup> and the data subsequently replotted in Origin. Figure S3 shows a plot of AlogP vs Molecular weight for the deprotected scaffold library.

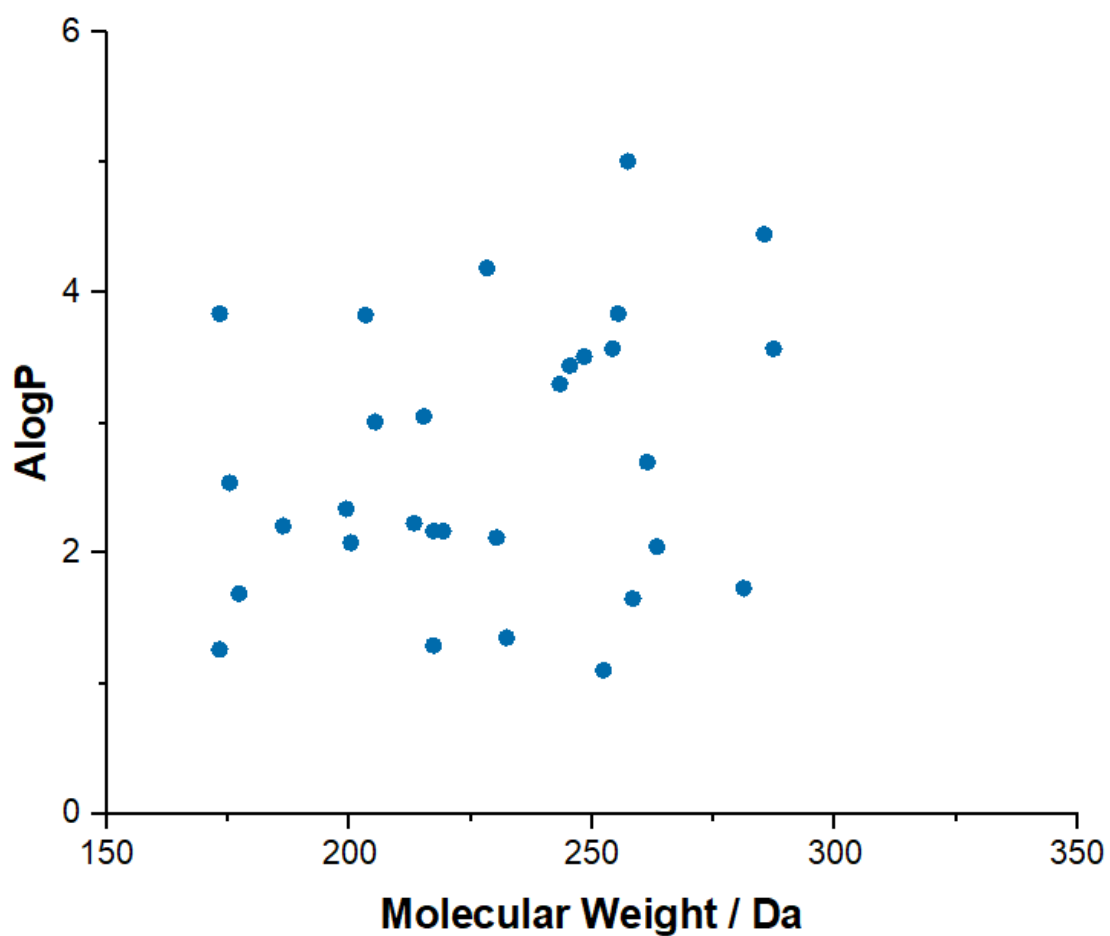

**Figure S3:** Plot of AlogP vs Molecular weight for the deprotected scaffold library.

### Scaffold Shape Diversity Assessment

The principle moments of inertia of the lowest energy conformations of the deprotected scaffold library was performed using LLAMA. Figure S4 shows the PMI plot of the deprotected scaffold library.

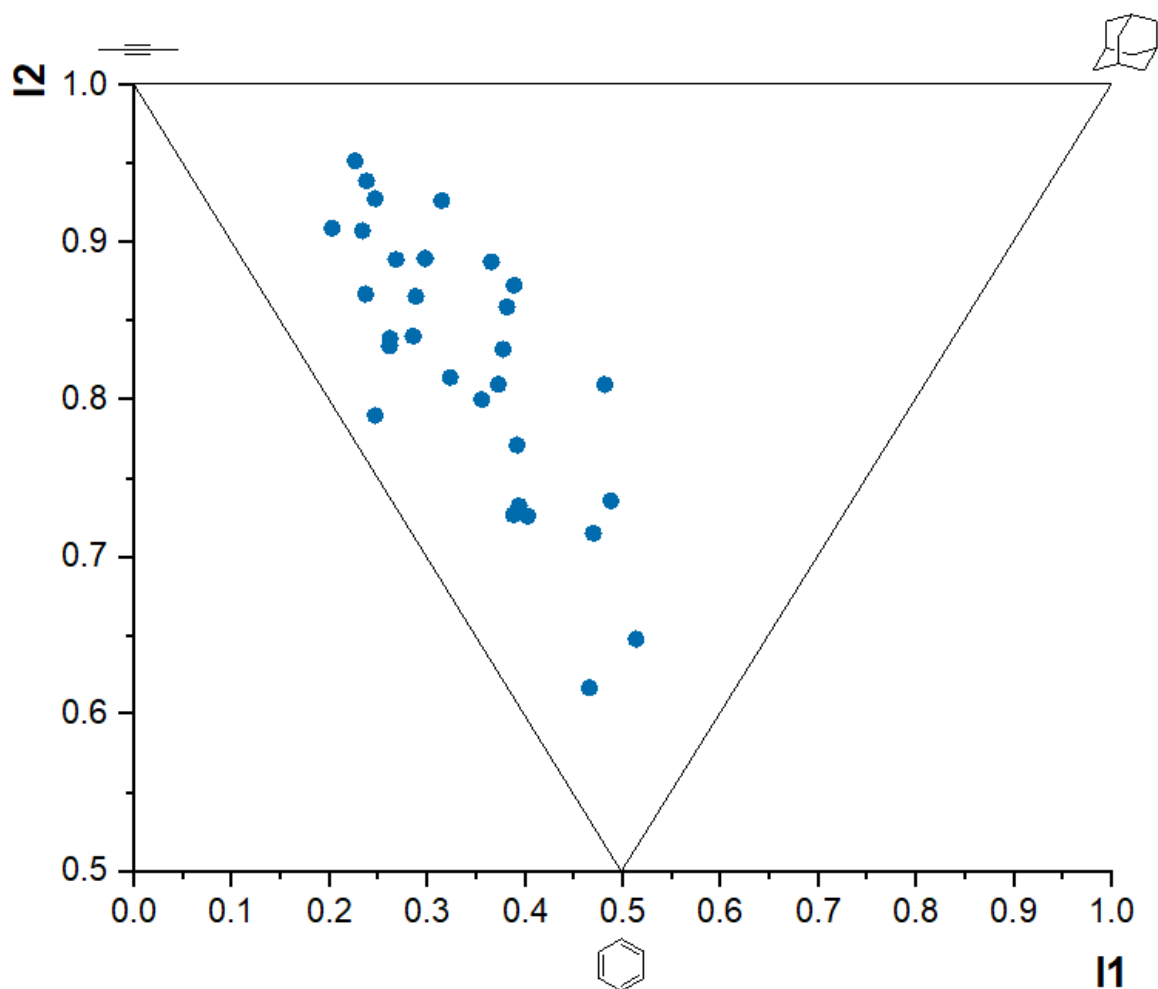

**Figure S4:** PMI plot of the deprotected scaffold library to highlight shape diversity.



## Virtual Library Molecular Property Assessment

Computational assessment of the molecular weight and AlogP of the virtual library was performed using LLAMA, where the scaffolds were decorated once with the set of medically relevant capping groups already present within LLAMA. Figure S5 shows a plot of AlogP vs Molecular weight for the virtually decorated library of compounds.

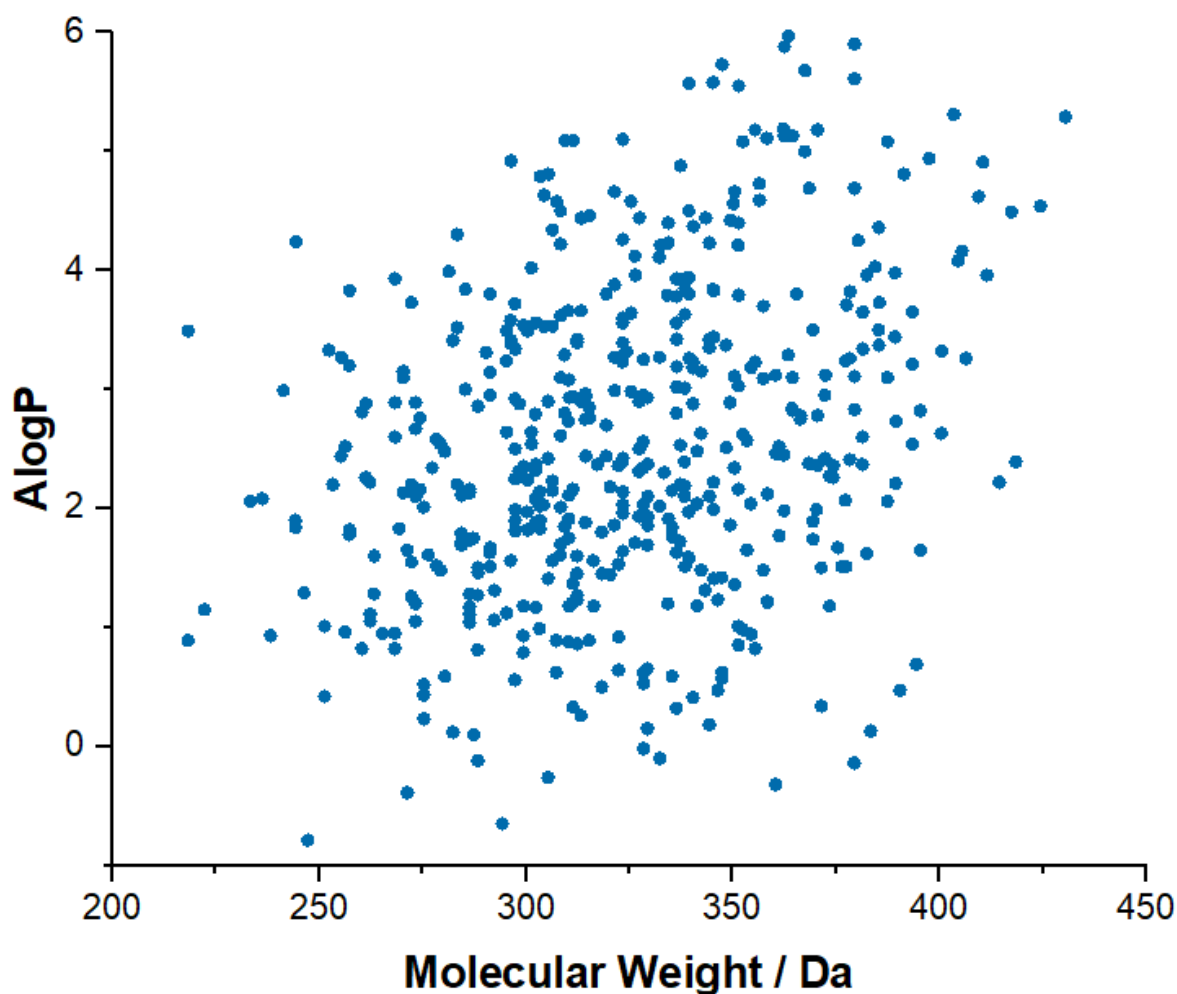

**Figure S5:** Plot of AlogP vs Molecular weight for the virtual library. The scaffold library was decorated once with medically relevant capping groups in LLAMA to provide a virtual mono-decorated library.

## Virtual Library Shape Diversity Assessment

The principle moments of inertia of the lowest energy conformations of the virtual library was performed using LLAMA. Figure S6 shows the PMI plot of the virtual library.

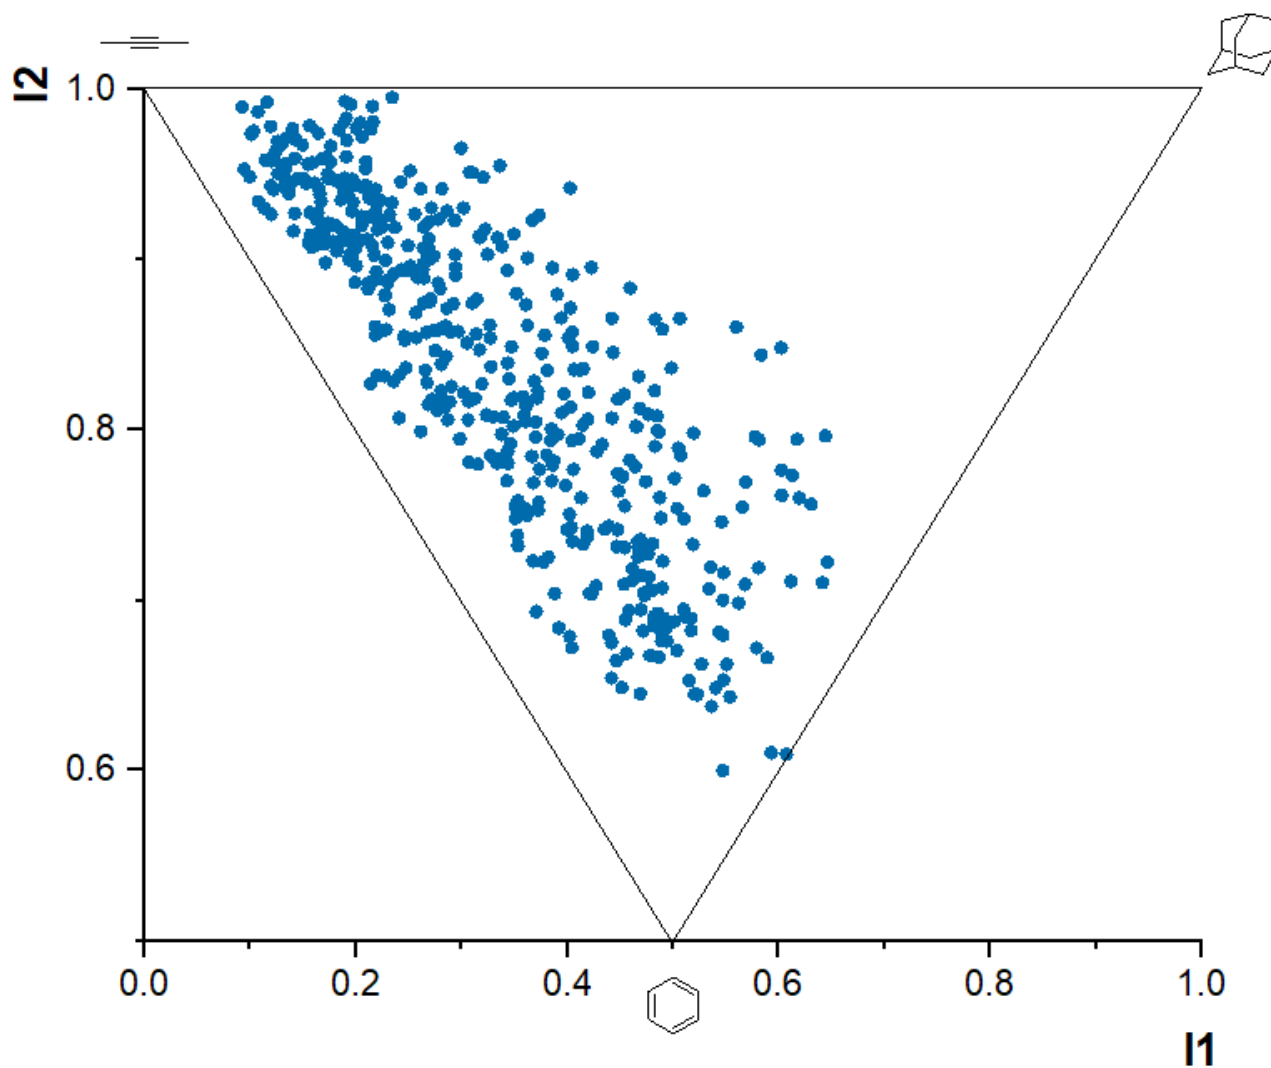

**Figure S6:** PMI plot of the virtual scaffold library to highlight shape diversity.

**Proposed Mechanism for Rearrangement Process (Compound 5)**

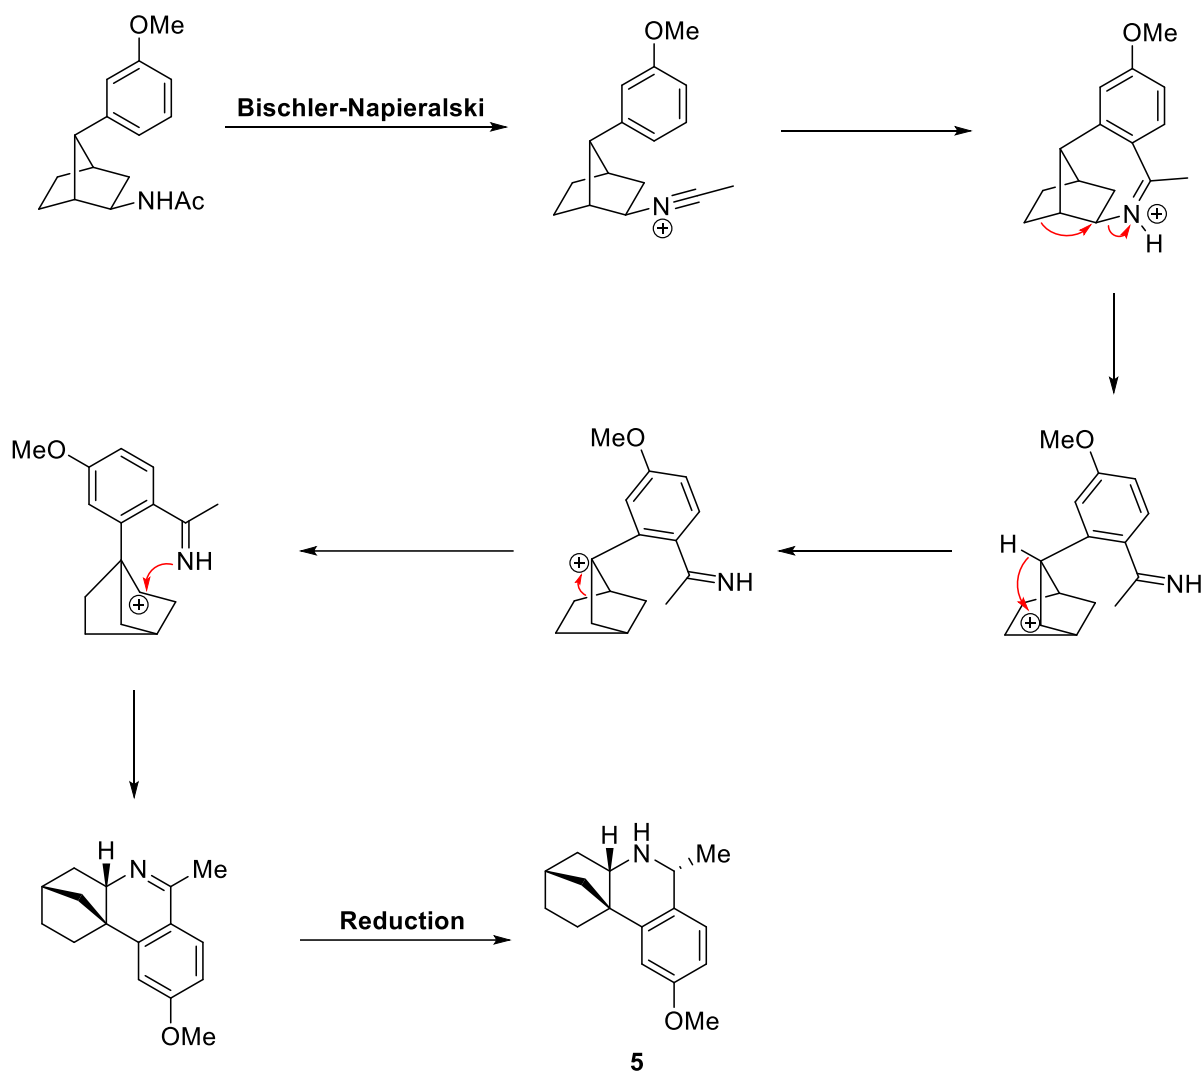

**Figure S7:** Proposed mechanism for the rearrangement process observed in the synthesis of compound 5.

## NMR Spectra

S263  
Name - Scott Rice  
Room No. - G56  
Sample - S263

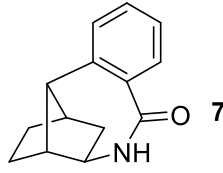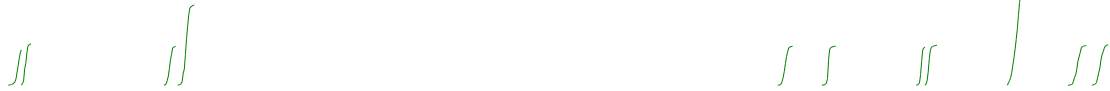 $^1\text{H}$  NMR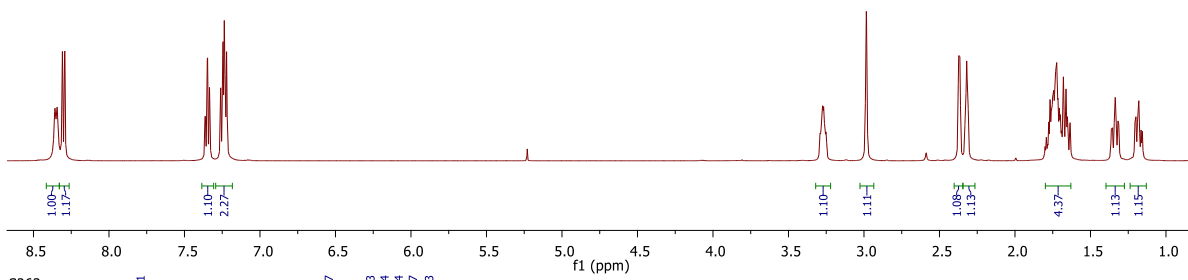

S263  
Name - Scott Rice  
Room No. - G56  
Sample - S263

140.97  
132.03  
131.64  
131.14  
131.07  
125.93

57.43  
54.68  
46.12  
43.07  
37.99

27.69  
27.43

 $^{13}\text{C}$  NMR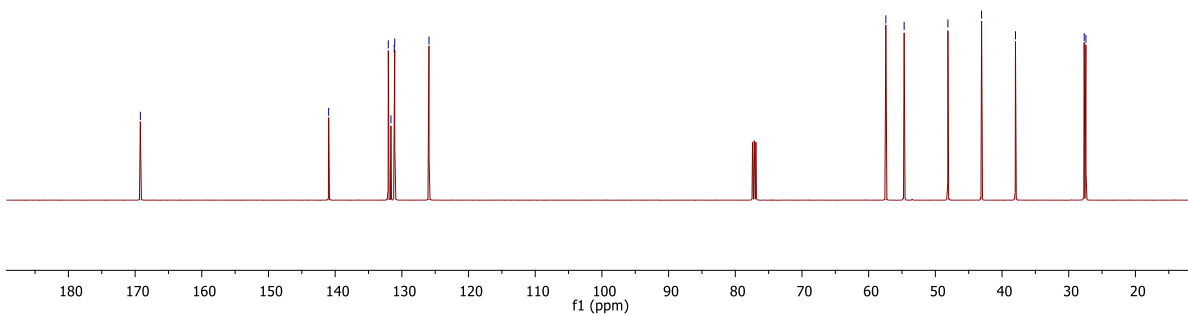

S268  
Name - Scott Rice  
Room No. - G56  
Sample - S268

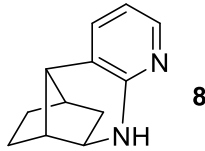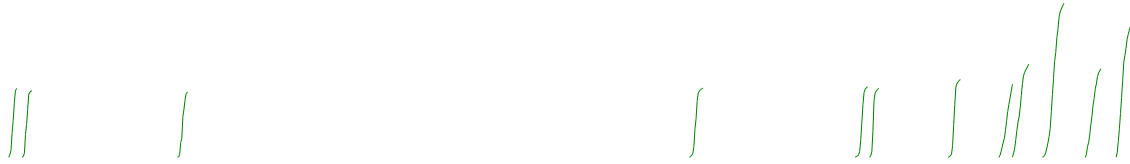

### $^1\text{H}$ NMR

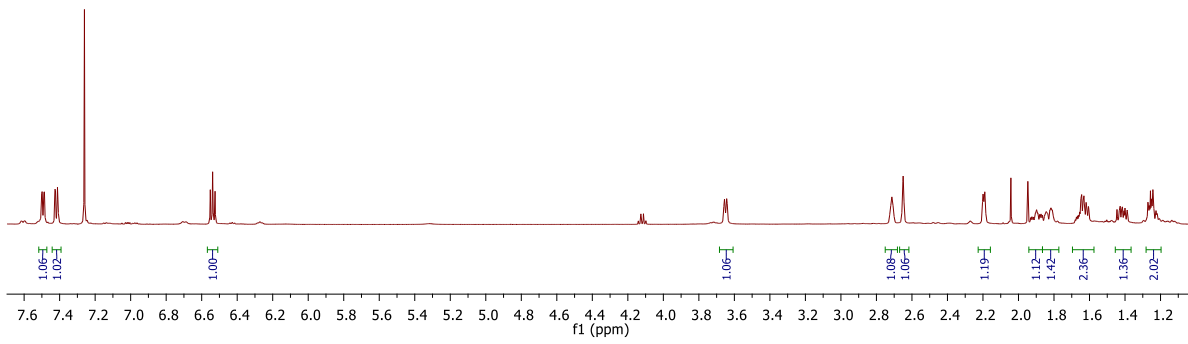

S268  
Name - Scott Rice  
Room No. - G56  
Sample - S268

### $^{13}\text{C}$ NMR

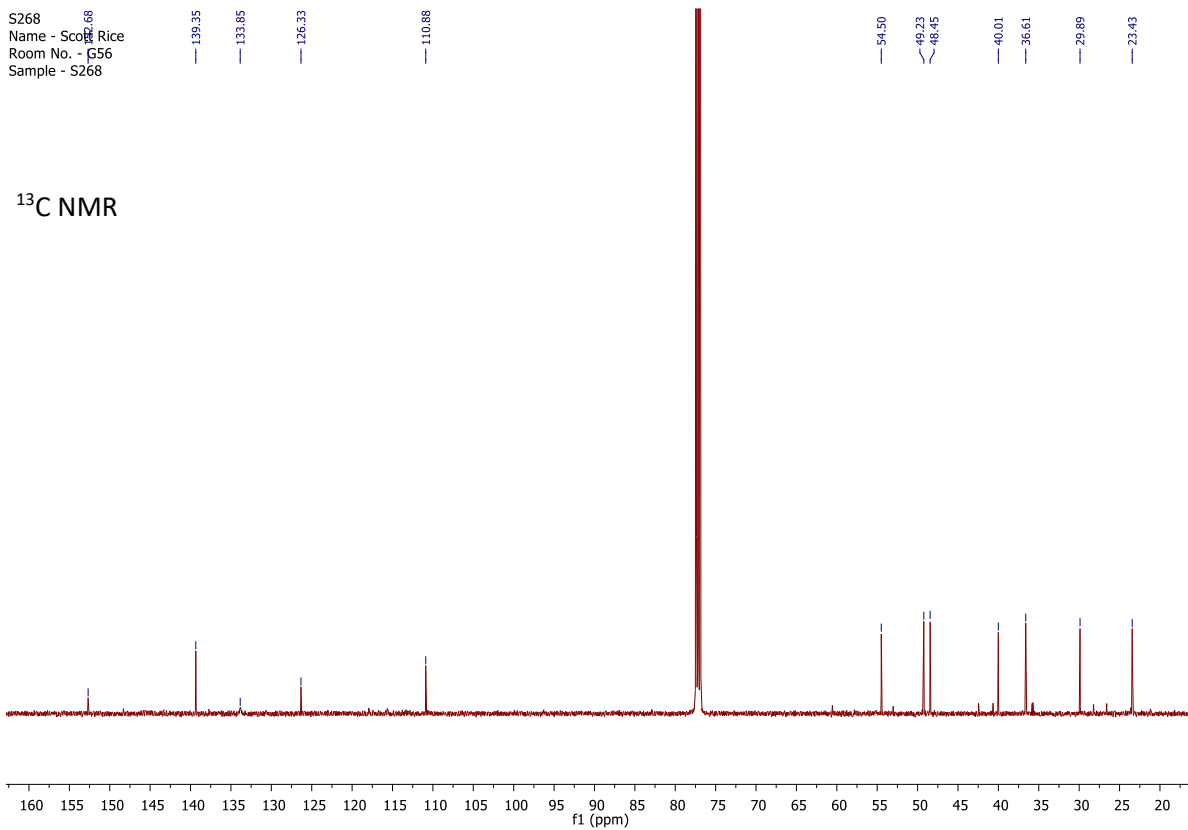

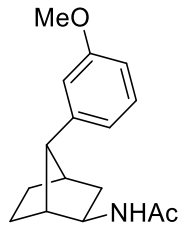

S252  
Name - Scott Rice  
Room No. - G56  
Sample - S252

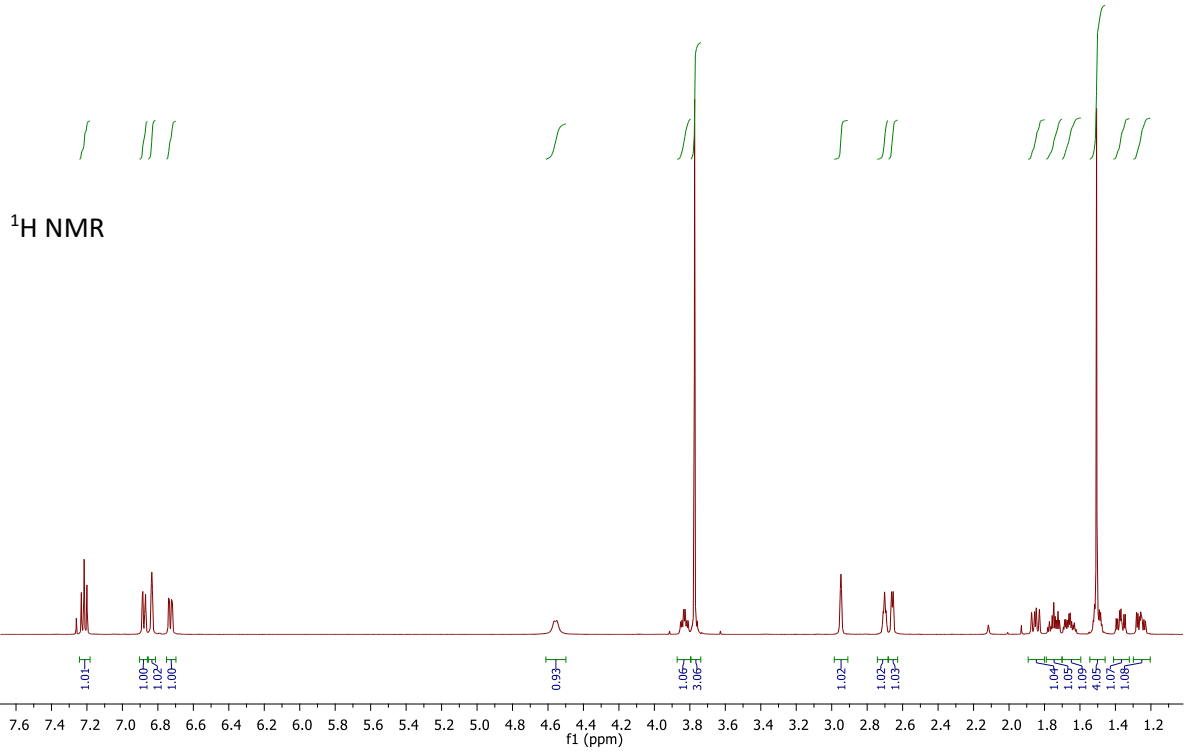

S252  
Name - Scott Rice  
Room No. - G56  
Sample - S252

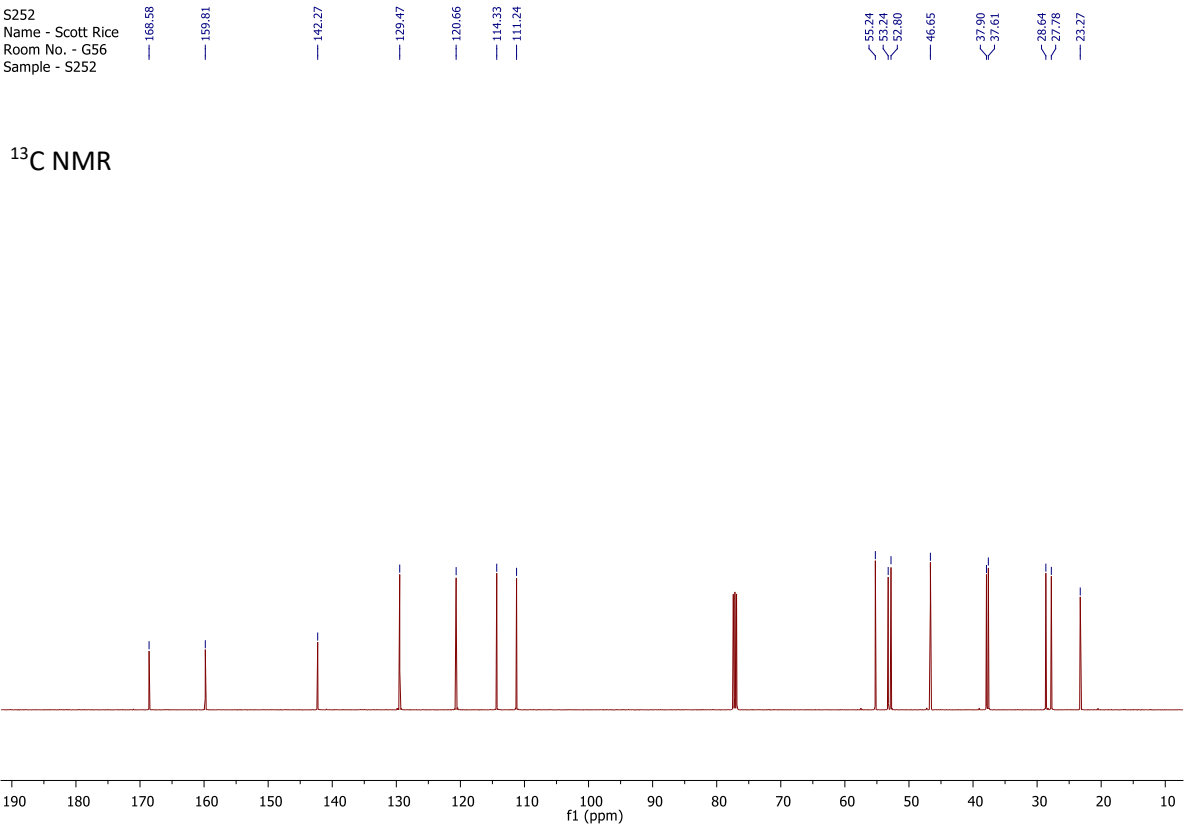

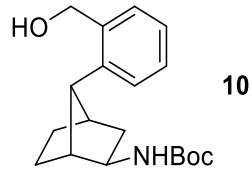

sample14216  
 Name - Scott Rice  
 Room No. - G56  
 Sample - S265

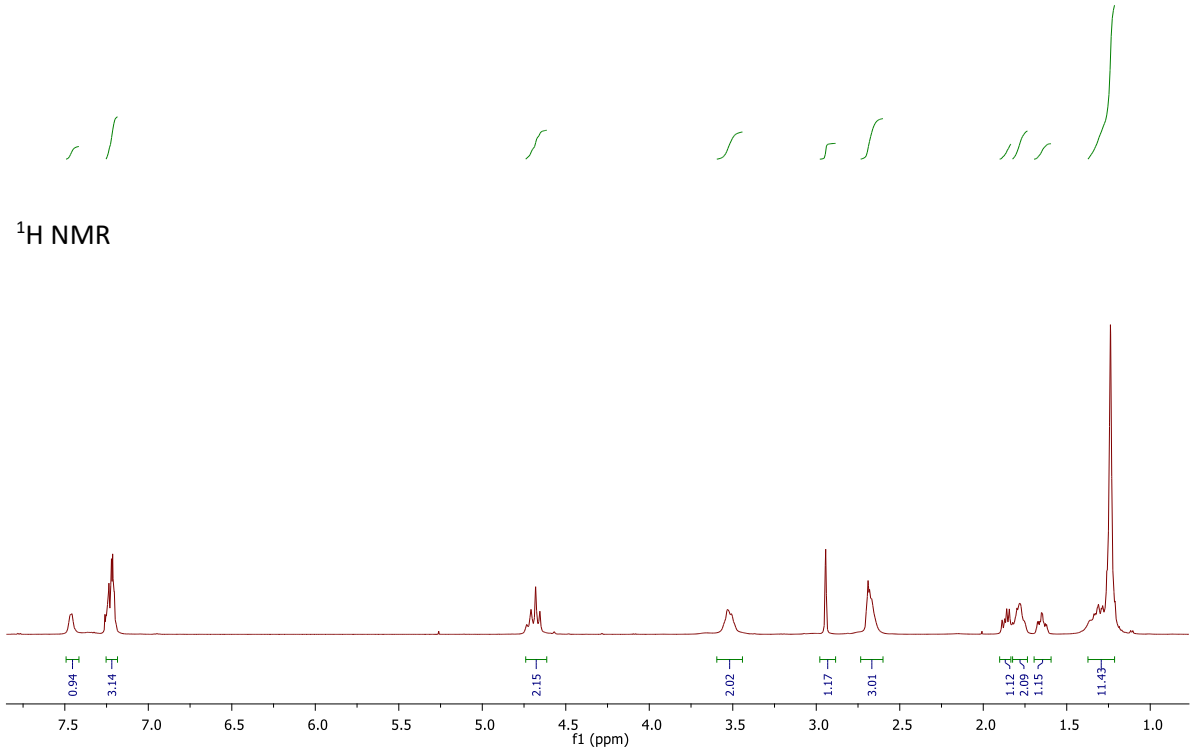

sample14216  
 Name - Scott Rice  
 Room No. - G56  
 Sample - S265

135.15, 140.06, 138.04, 128.27, 127.35, 127.28, 126.63, 78.74, 62.47, 54.90, 50.90, 47.02, 38.25, 38.17, 28.64, 28.29, 27.59

<sup>13</sup>C NMR

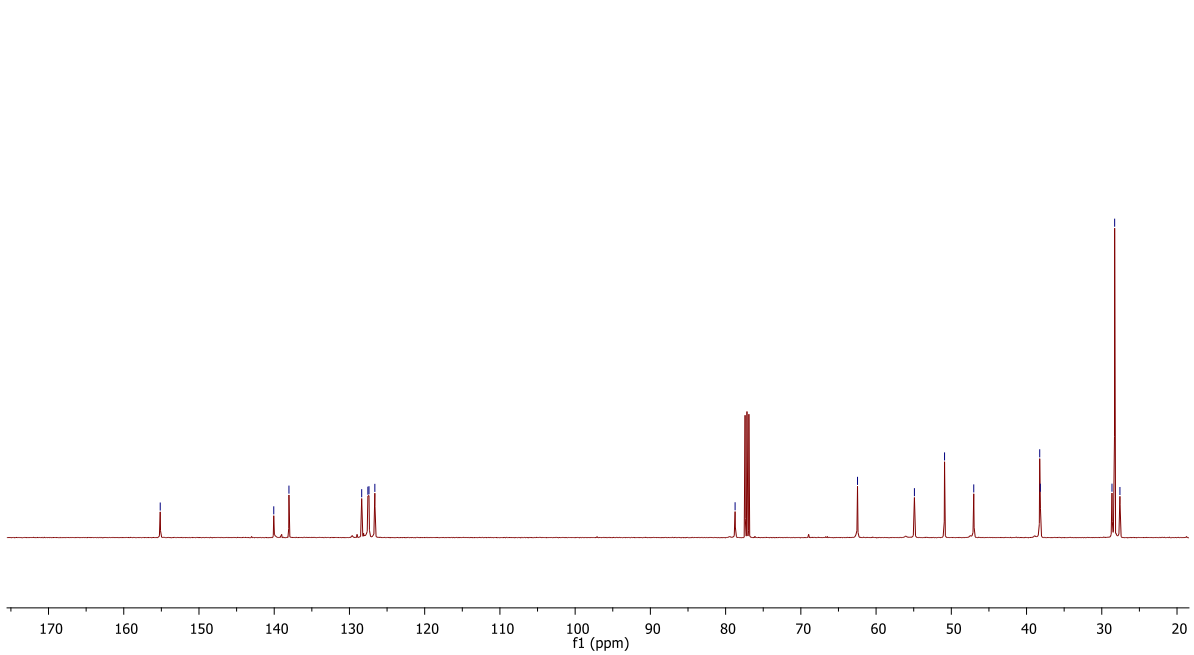

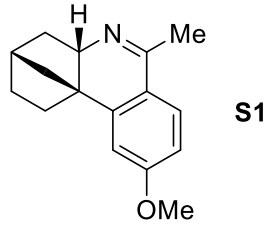

S253  
Name - Scott Rice  
Room No. - G56  
Sample - S253

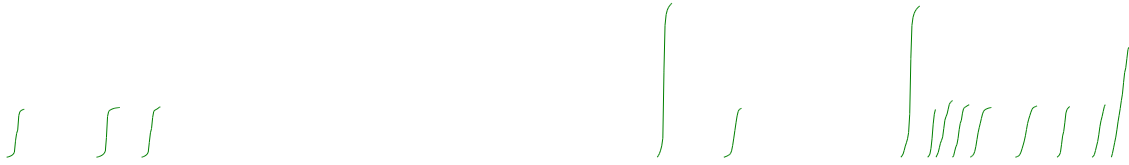

### <sup>1</sup>H NMR

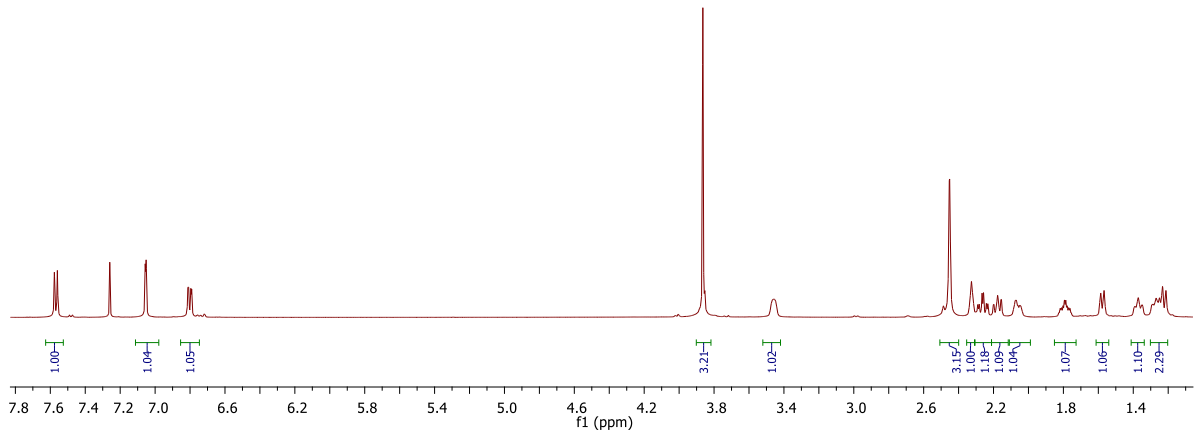

S253  
Name - Scott Rice  
Room No. - G56  
Sample - S253

### <sup>13</sup>C NMR

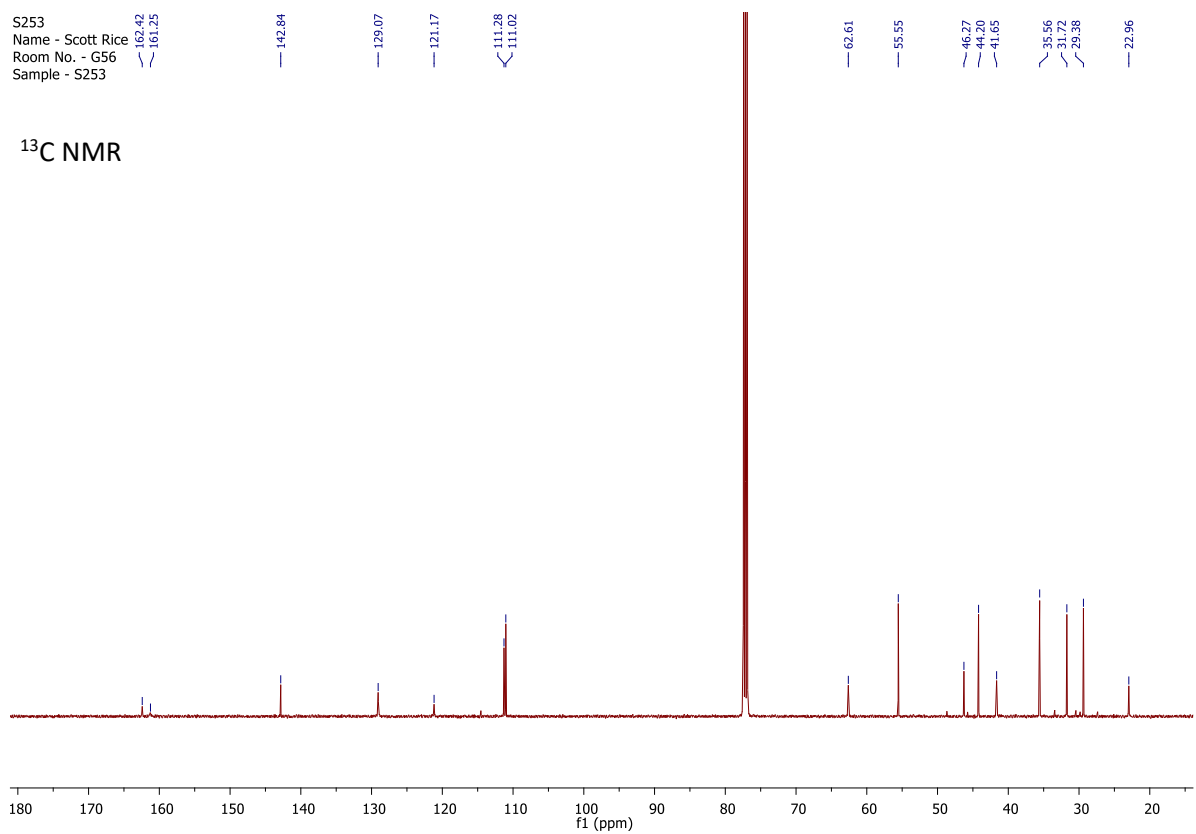



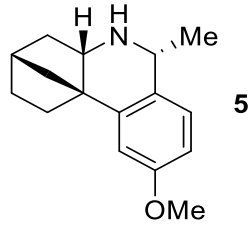

S254c  
Name - Scott Rice  
Room No. - G56  
Sample - S254c

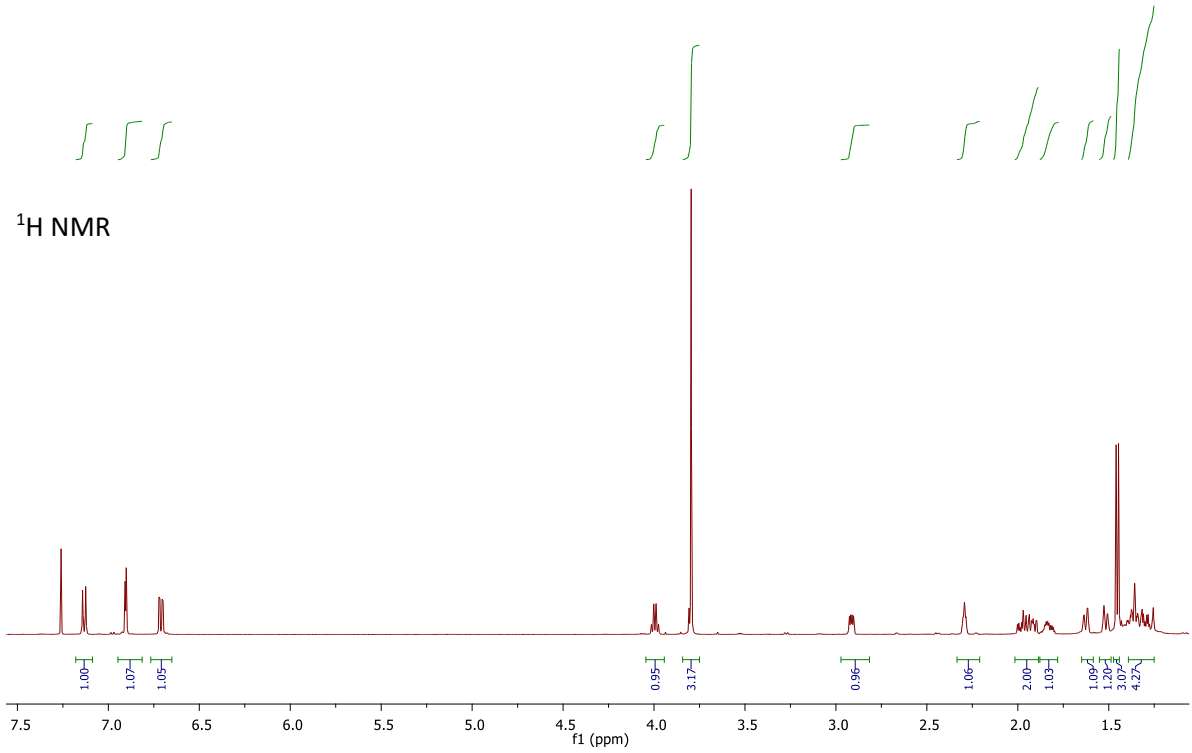

S254c  
Name - Scott Rice  
Room No. - G56  
Sample - S254c

<sup>13</sup>C NMR

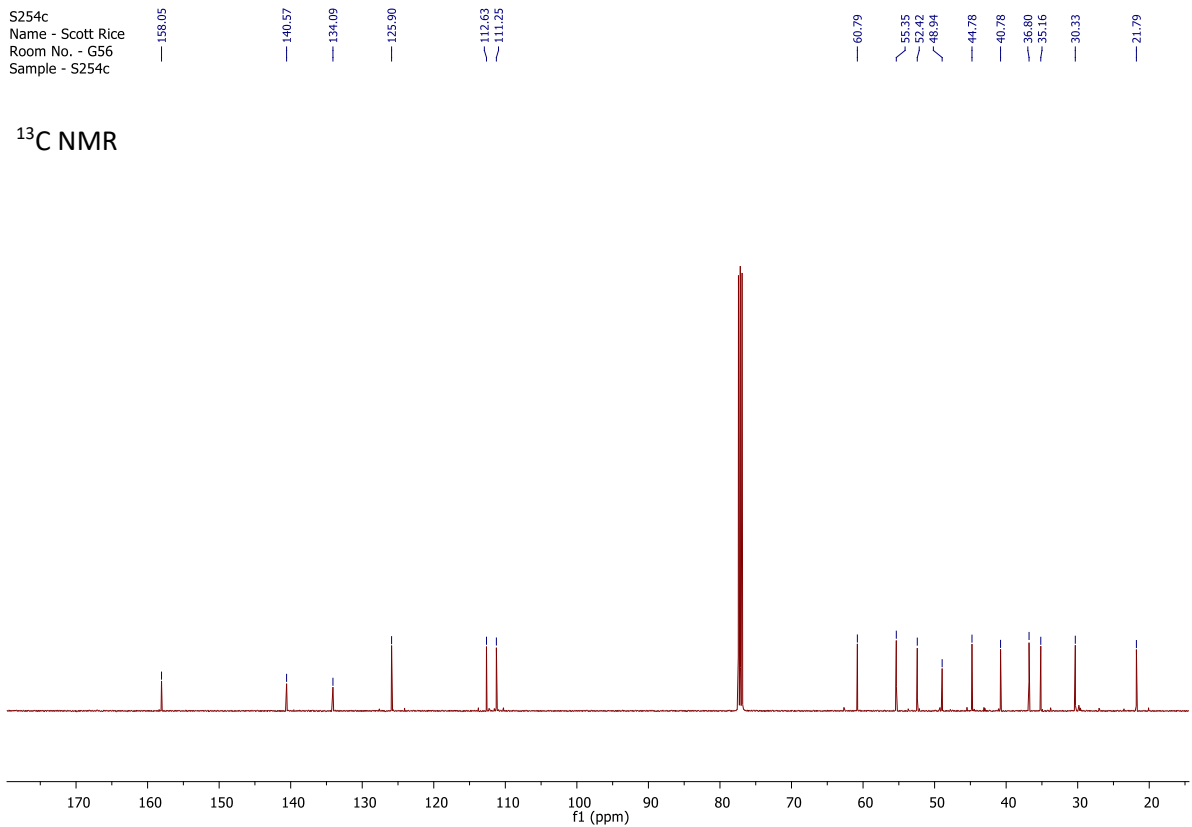

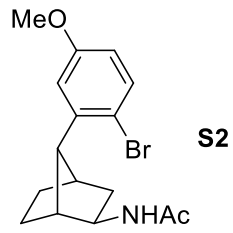

S260  
Name - Scott Rice  
Room No. - G56  
Sample - S260

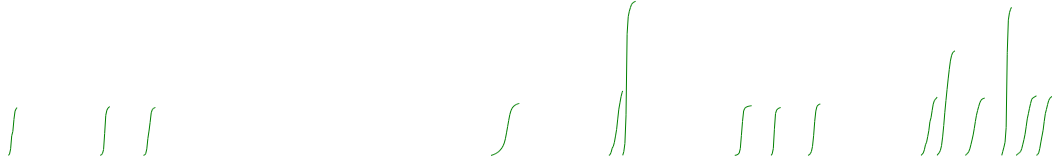<sup>1</sup>H NMR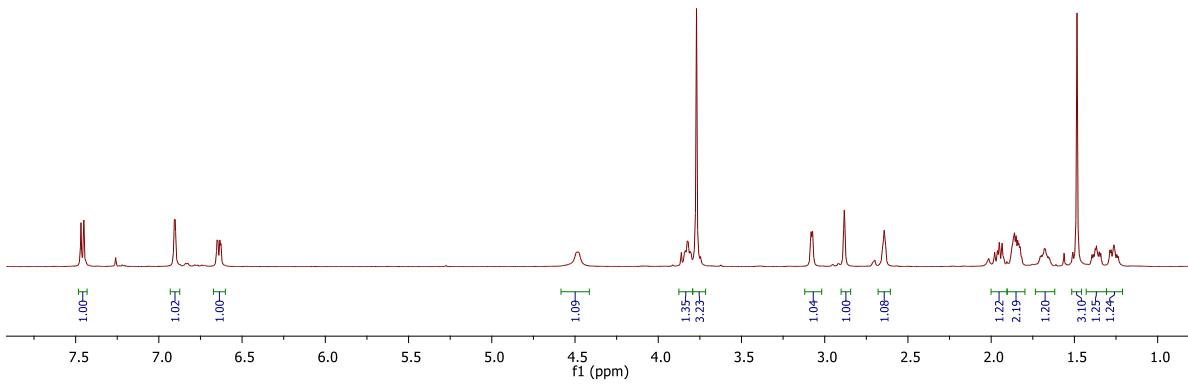

S260  
Name - Scott Rice  
Room No. - G56  
Sample - S260

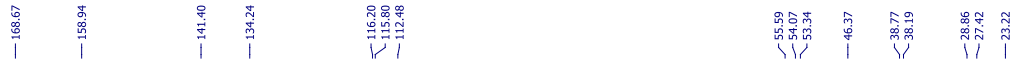<sup>13</sup>C NMR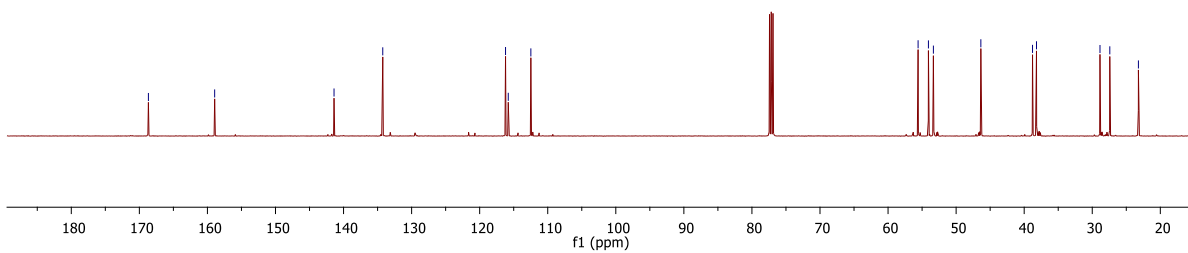

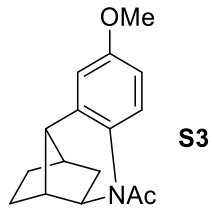

S261  
Name - Scott Rice  
Room No. - G56  
Sample - S261

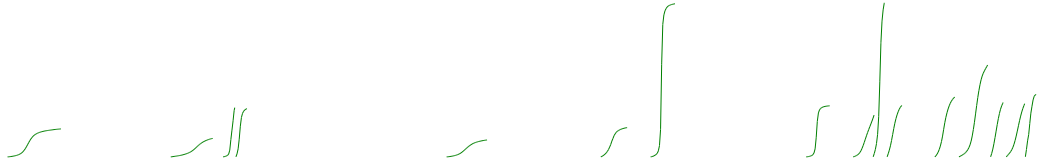**<sup>1</sup>H NMR**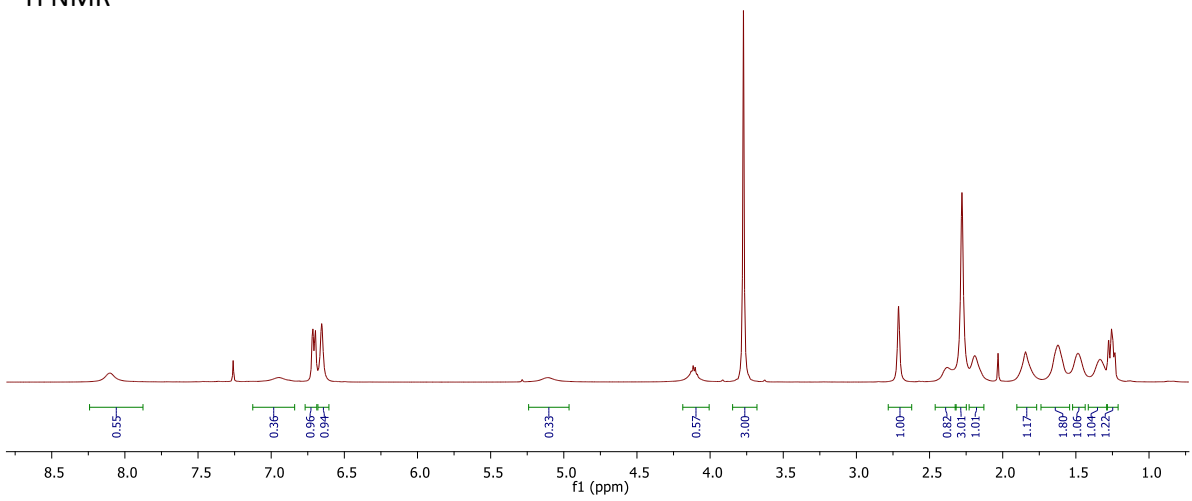

S261  
Name - Scott Rice  
Room No. - G56  
Sample - S261

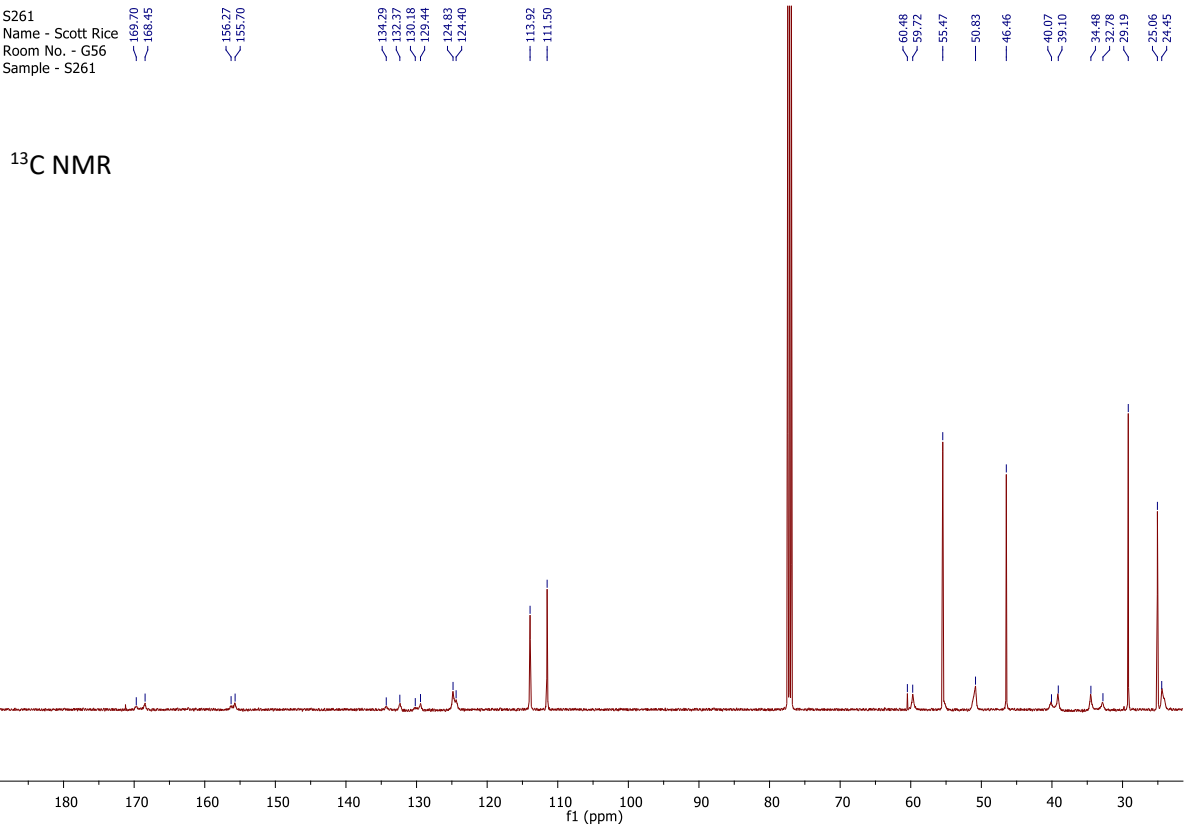**<sup>13</sup>C NMR**

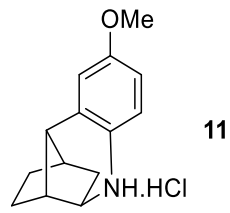

S262  
 Name - Scott Rice  
 Room No. - G56  
 Sample - S262

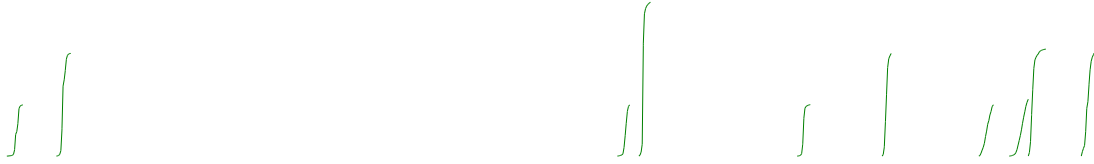

### <sup>1</sup>H NMR

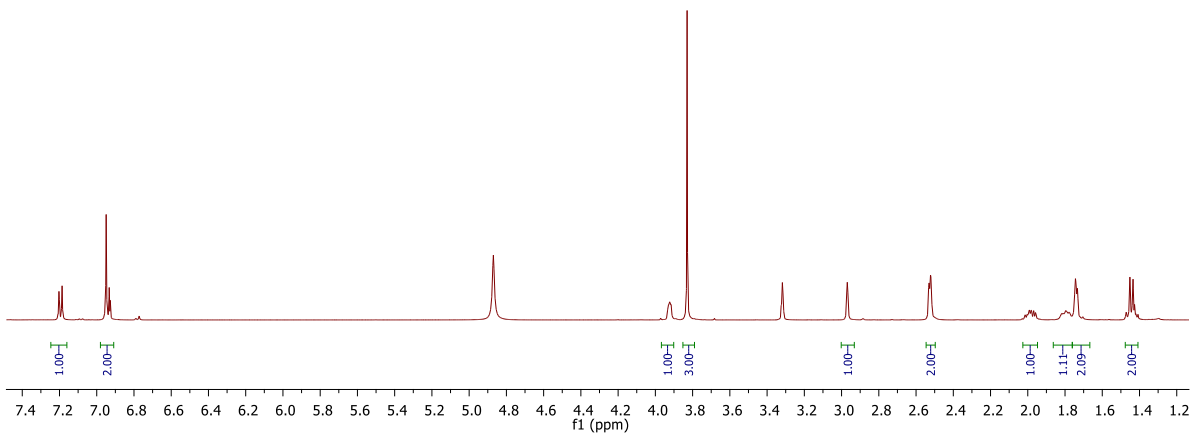

S262  
 Name - Scott Rice  
 Room No. - G56  
 Sample - S262

161.57

136.82

125.26

120.72

116.19

115.03

57.58

56.16

49.45

46.73

40.79

32.03

30.37

24.81

### <sup>13</sup>C NMR

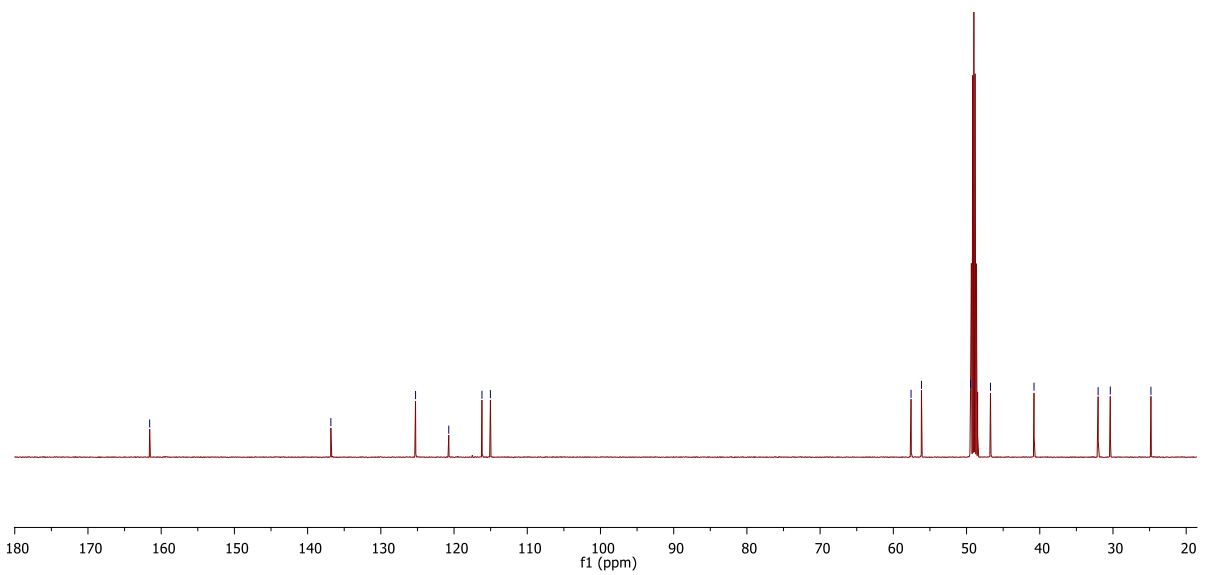

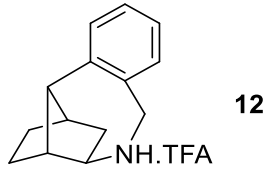

S266  
Name - Scott Rice  
Room No. - G56  
Sample - S266

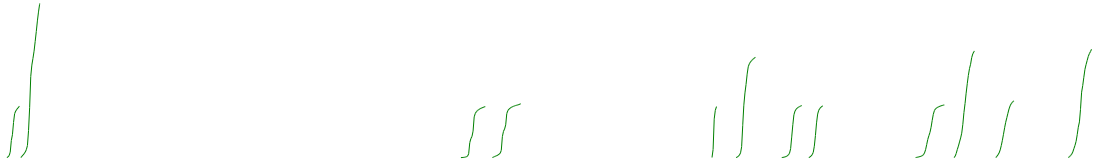 $^1\text{H}$  NMR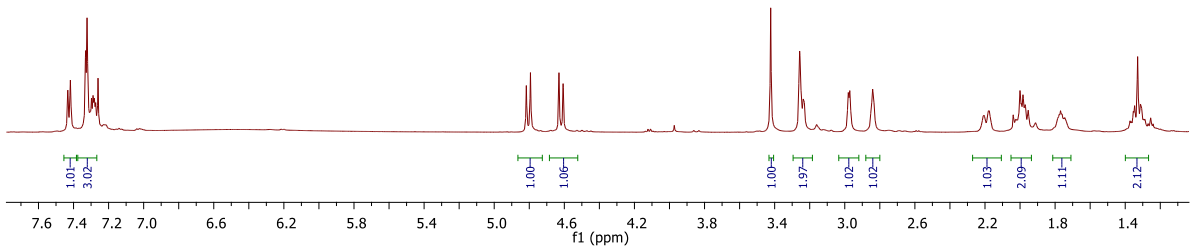

S266  
Name - Scott Rice  
Room No. - G56  
Sample - S266

162.74  
162.46  
162.18  
161.90

137.36  
136.73  
132.40  
128.56  
128.08

119.99  
117.66  
115.33  
113.01

55.58  
50.35  
45.47  
44.19  
38.69  
35.84  
28.30  
27.74

 $^{13}\text{C}$  NMR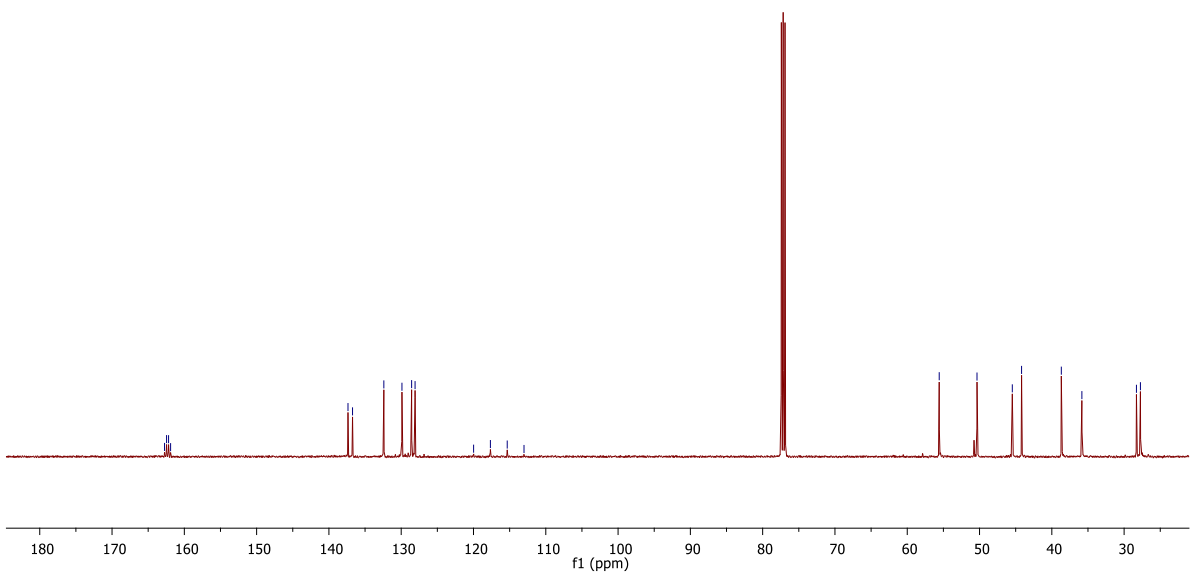

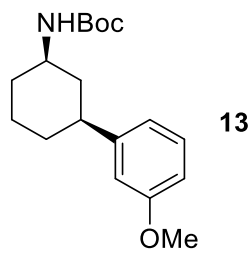

S244  
Name - Scott Rice  
Room No. - G56  
Sample - S244

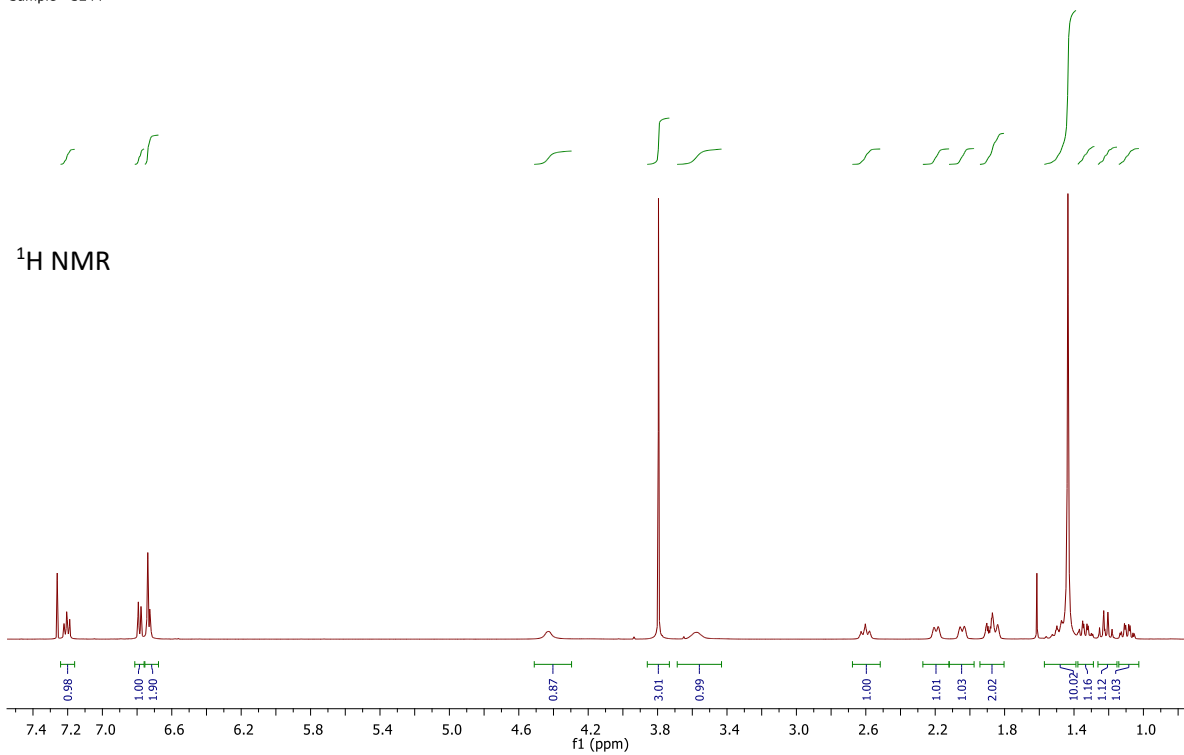

S244  
Name - Scott Rice  
Room No. - G56  
Sample - S244

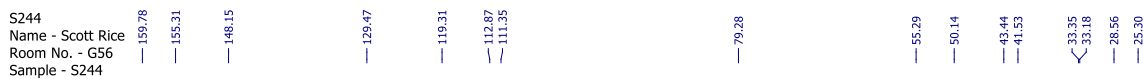

**<sup>13</sup>C NMR**

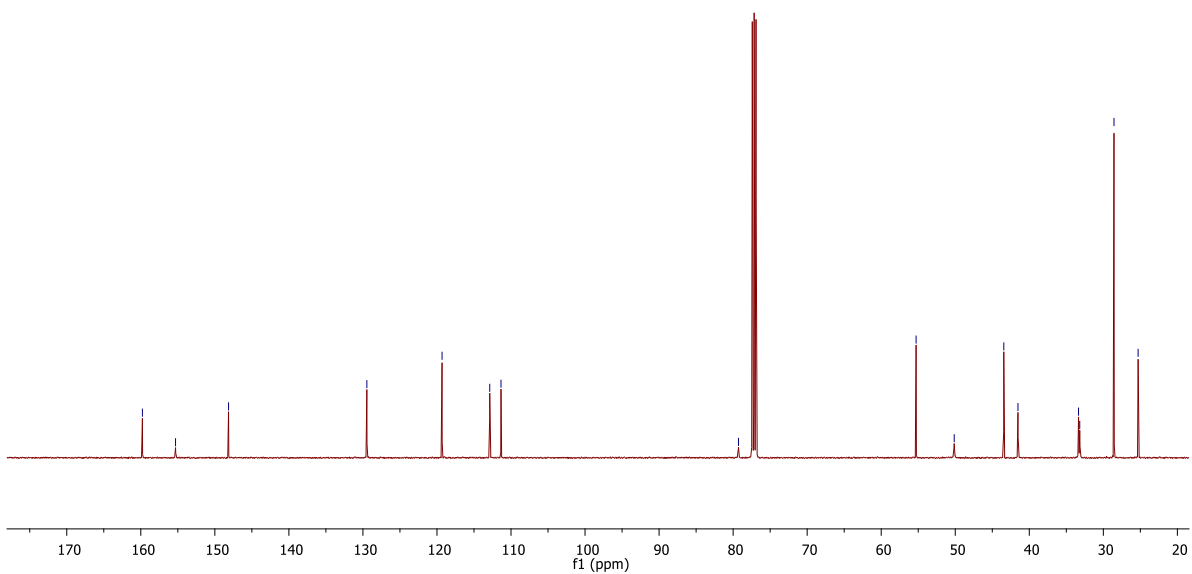

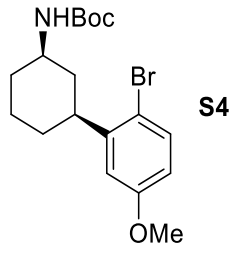

S236  
Name - Scott Rice  
Room No. - G56  
Sample - S236

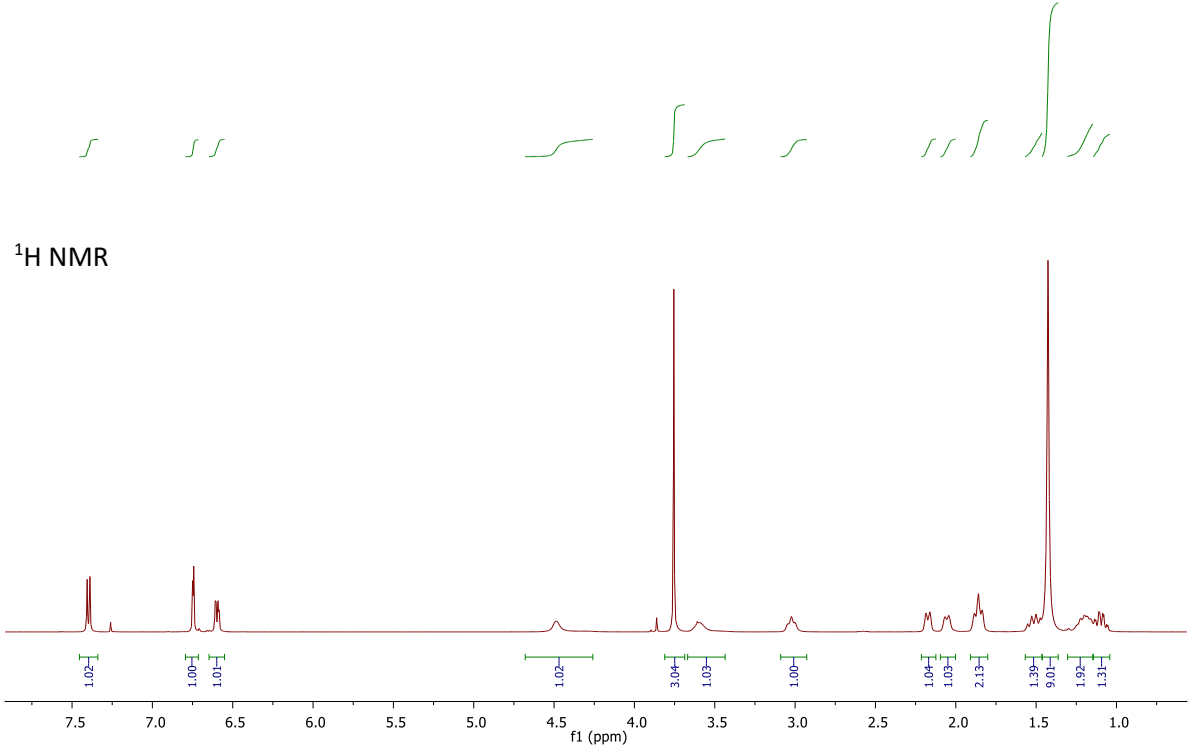

S236  
Name - Scott Rice  
Room No. - G56  
Sample - S236

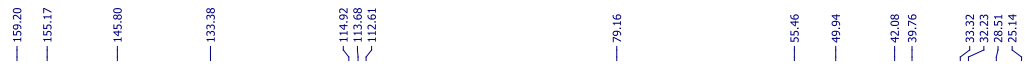

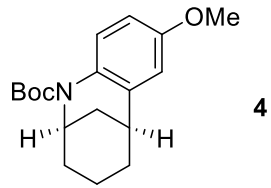

S237p  
Name - Scott Rice  
Room No. - G56  
Sample - S237p

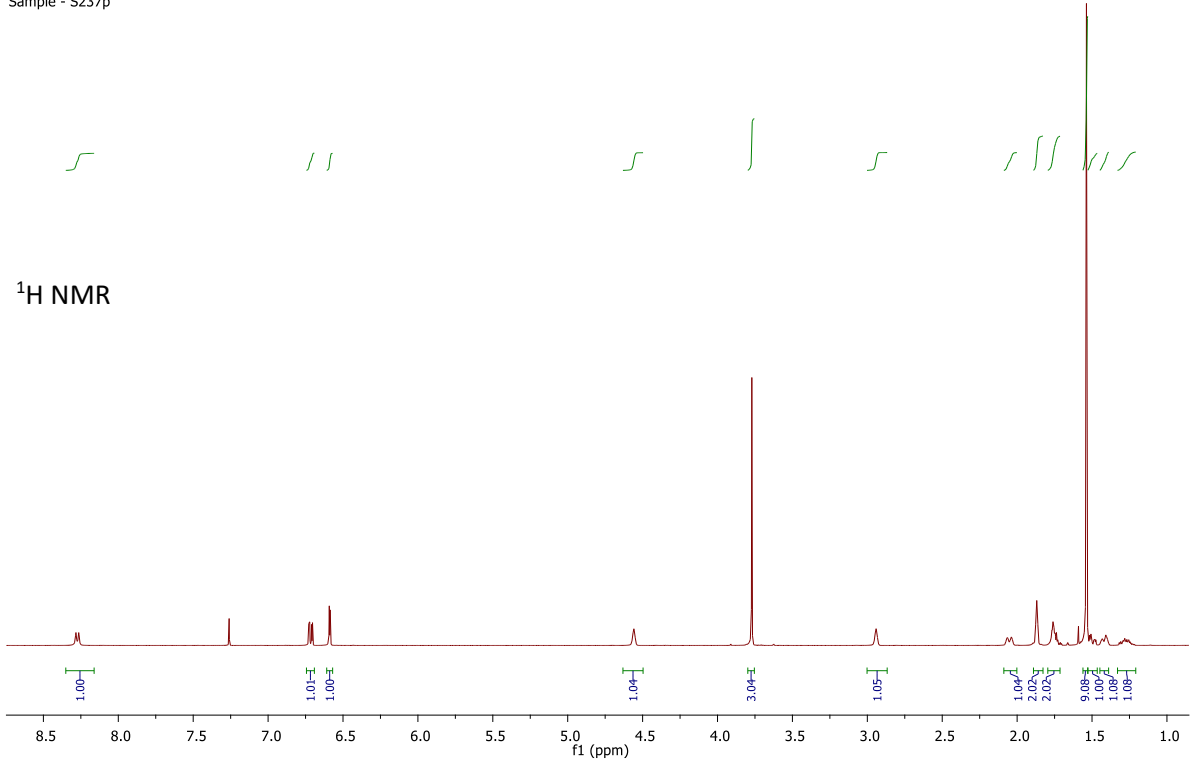

S237  
Name - Scott Rice  
Room No. - G56  
Sample - S237

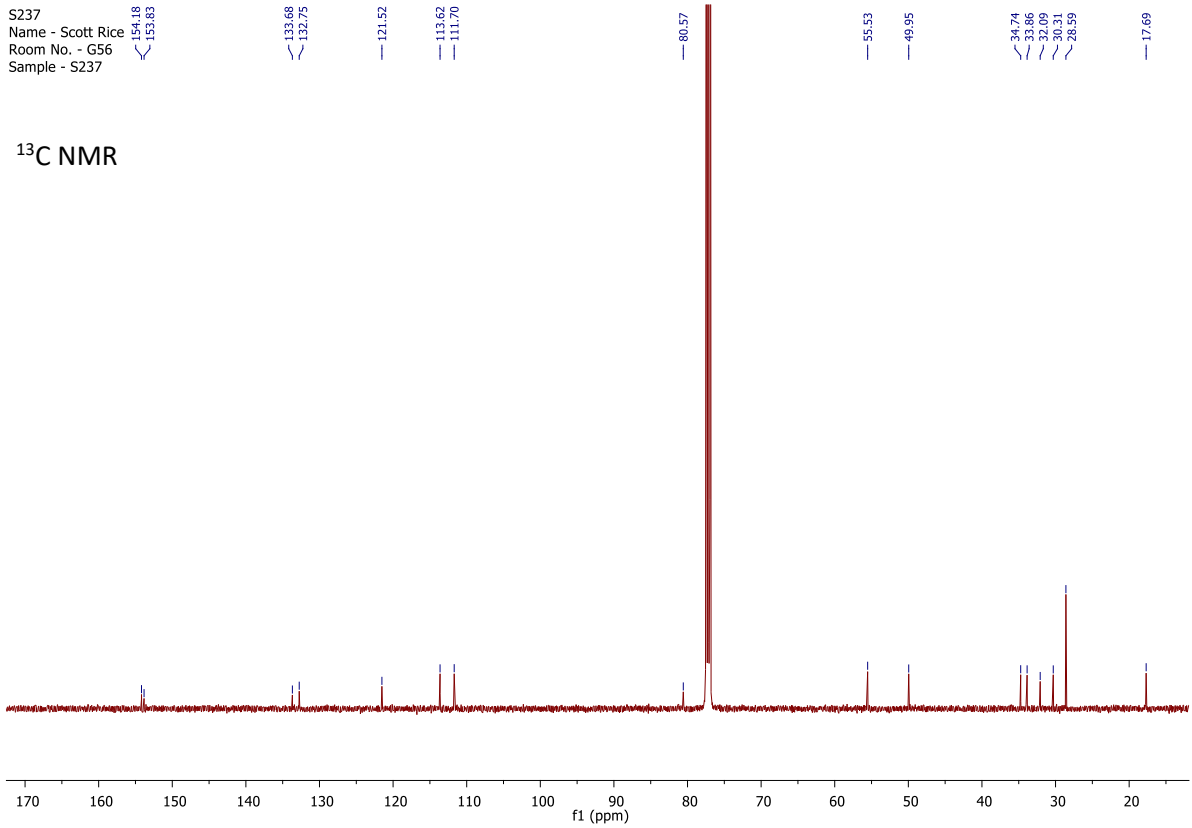



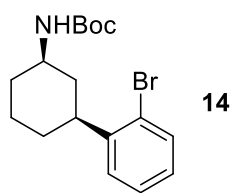

S222  
Name - Scott Rice  
Room No. - G56  
Sample - S222

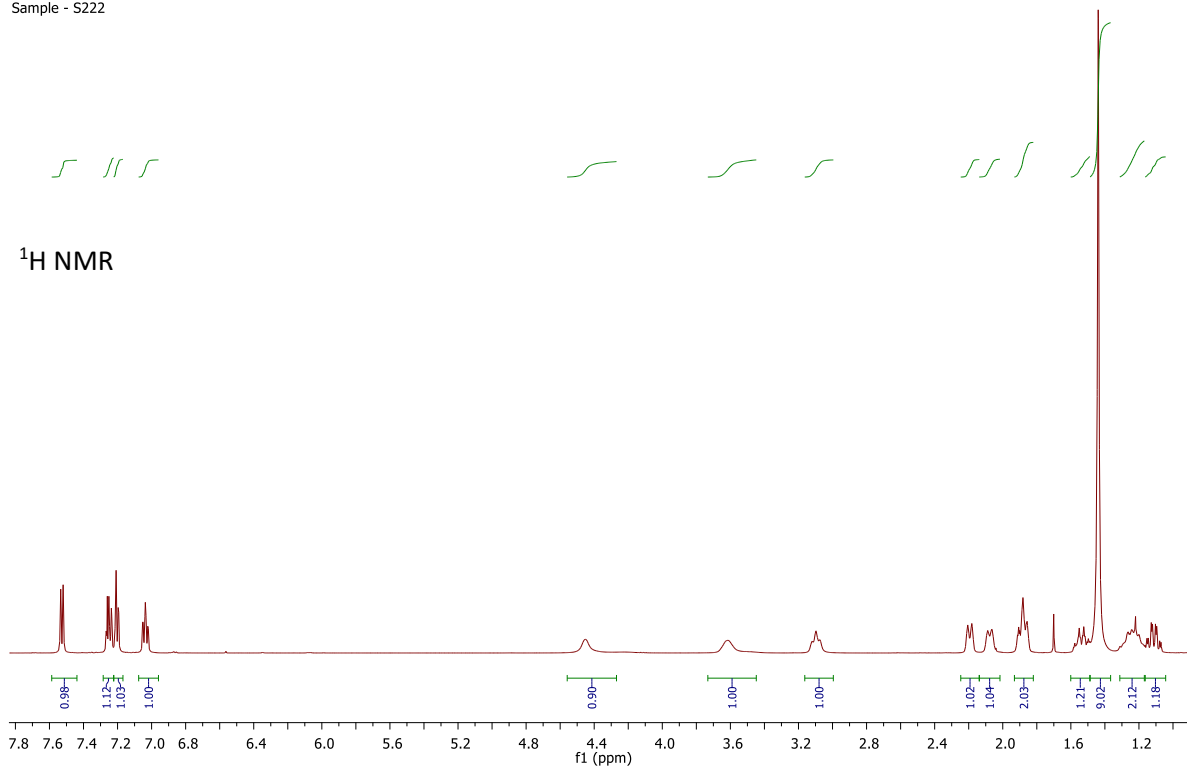

S222  
Name - Scott Rice  
Room No. - G56  
Sample - S222

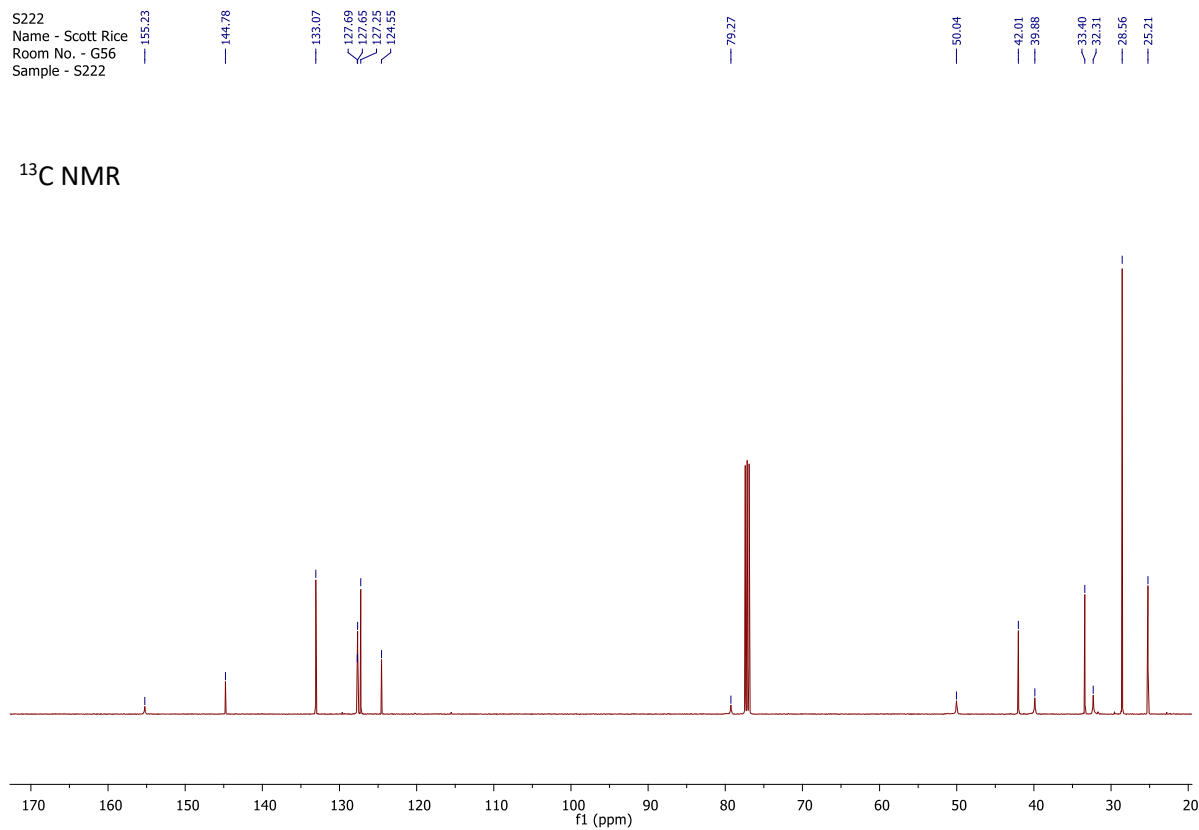

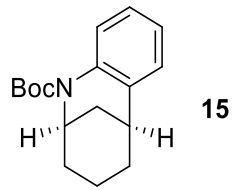

S228  
Name - Scott Rice  
Room No. - G56  
Sample - S228

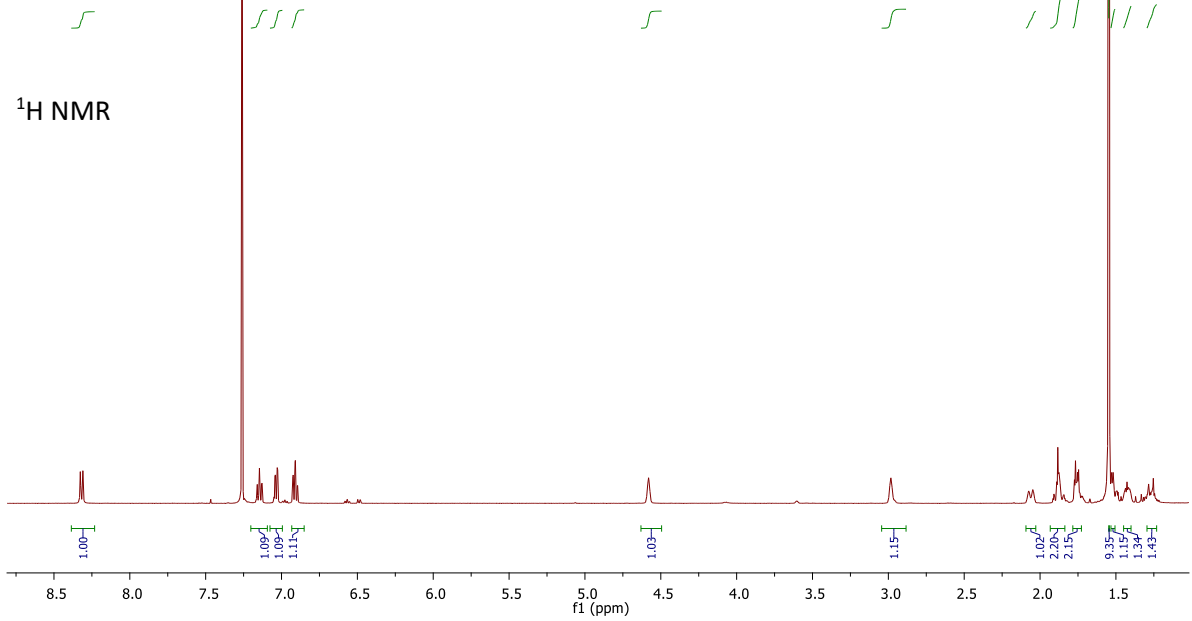

S228  
Name - Scott Rice  
Room No. - G56  
Sample - S228

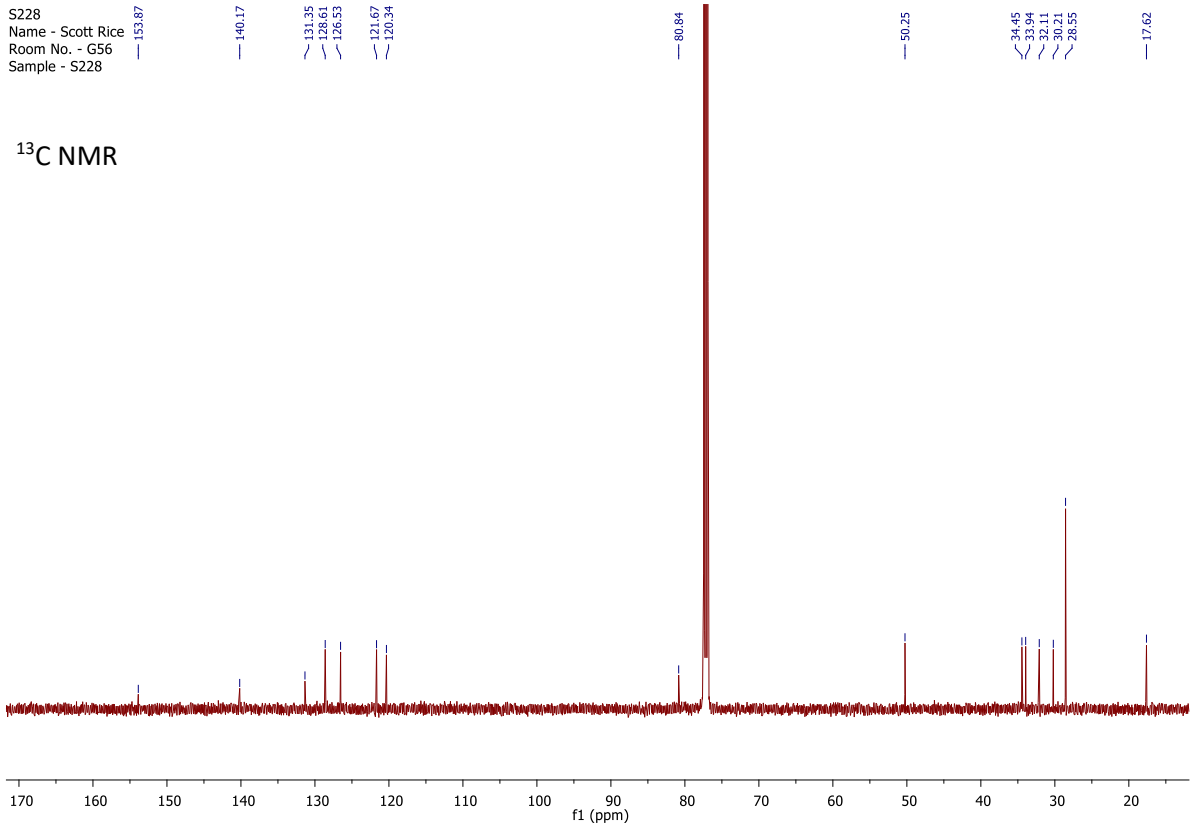

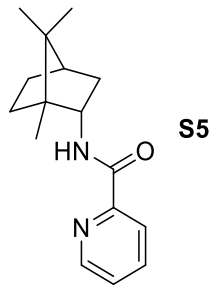

S387  
Name - Scott Rice  
Room No. - G56  
Sample - S387

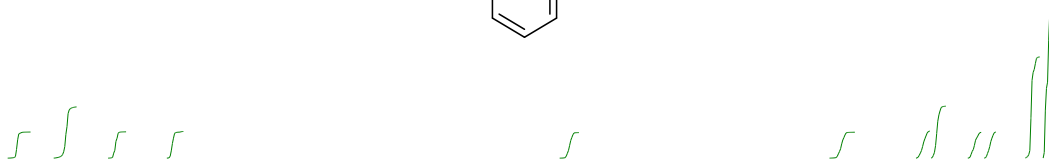**<sup>1</sup>H NMR**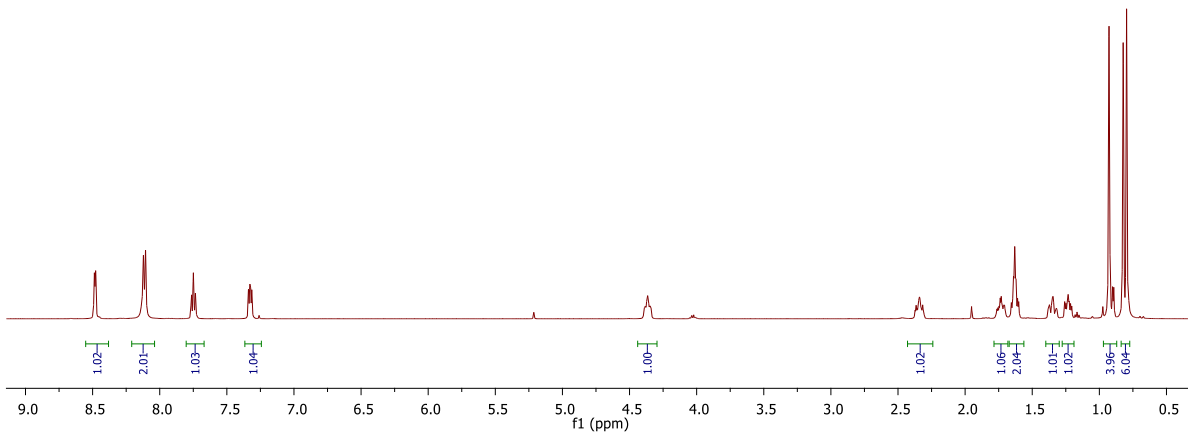

S387  
Name - Scott Rice  
Room No. - G56  
Sample - S387

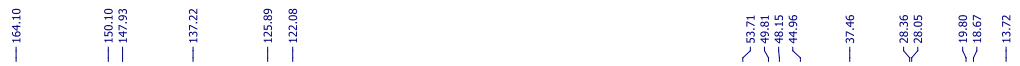**<sup>13</sup>C NMR**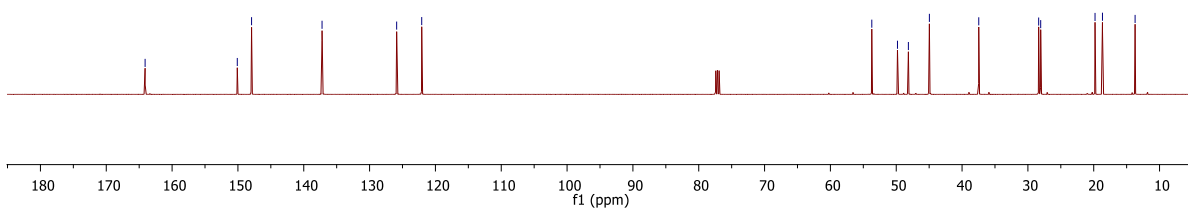

S388  
 Name - Scott Rice  
 Room No. - G56  
 Sample - S388

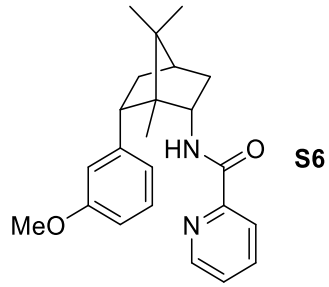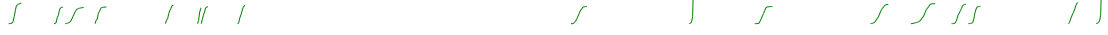**<sup>1</sup>H NMR**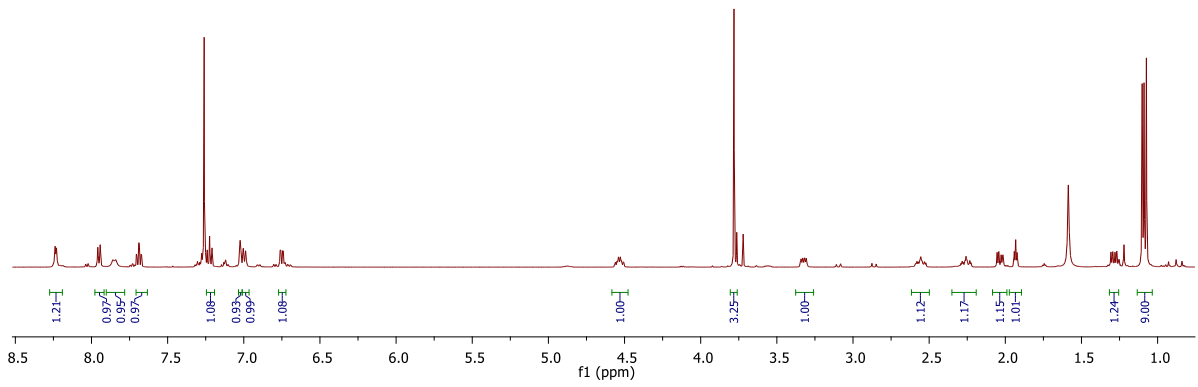

S388  
 Name - Scott Rice  
 Room No. - G56  
 Sample - S388

**<sup>13</sup>C NMR**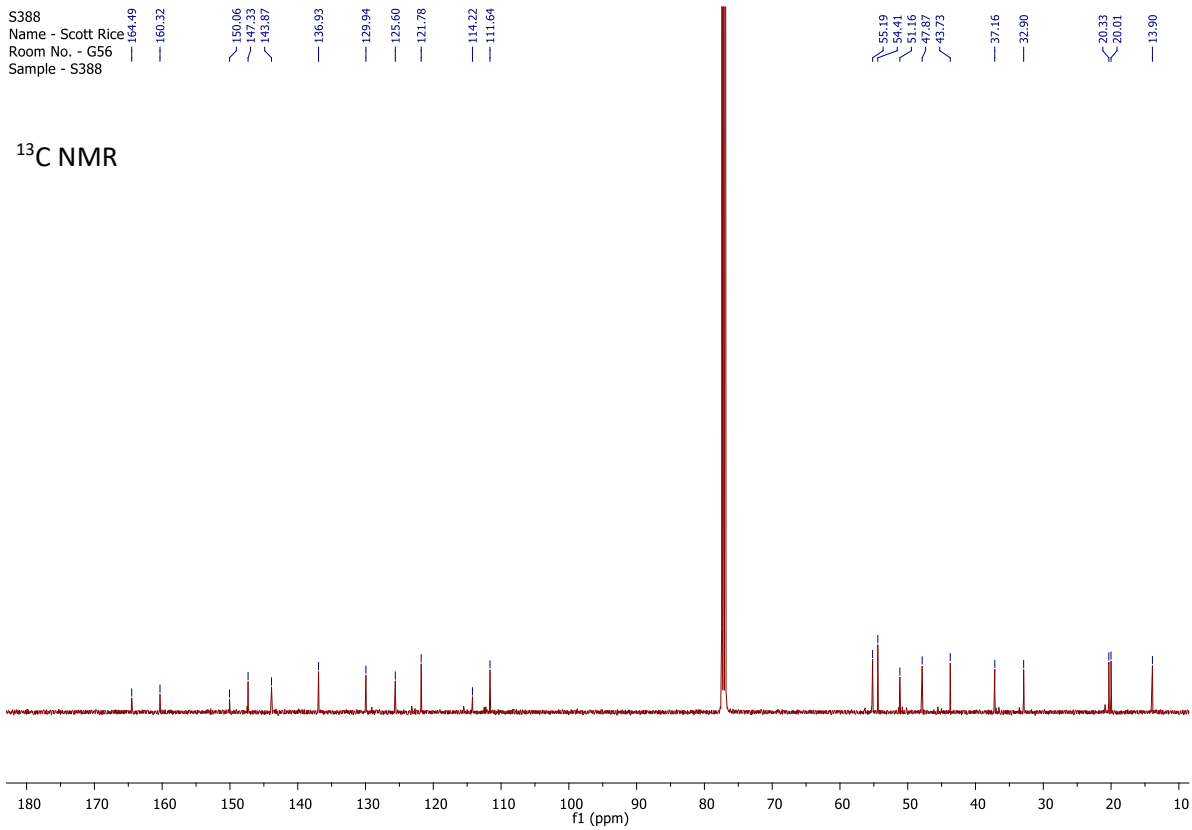

68

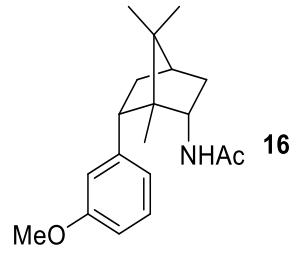

S389  
Name - Scott Rice  
Room No. - G56  
Sample - S389

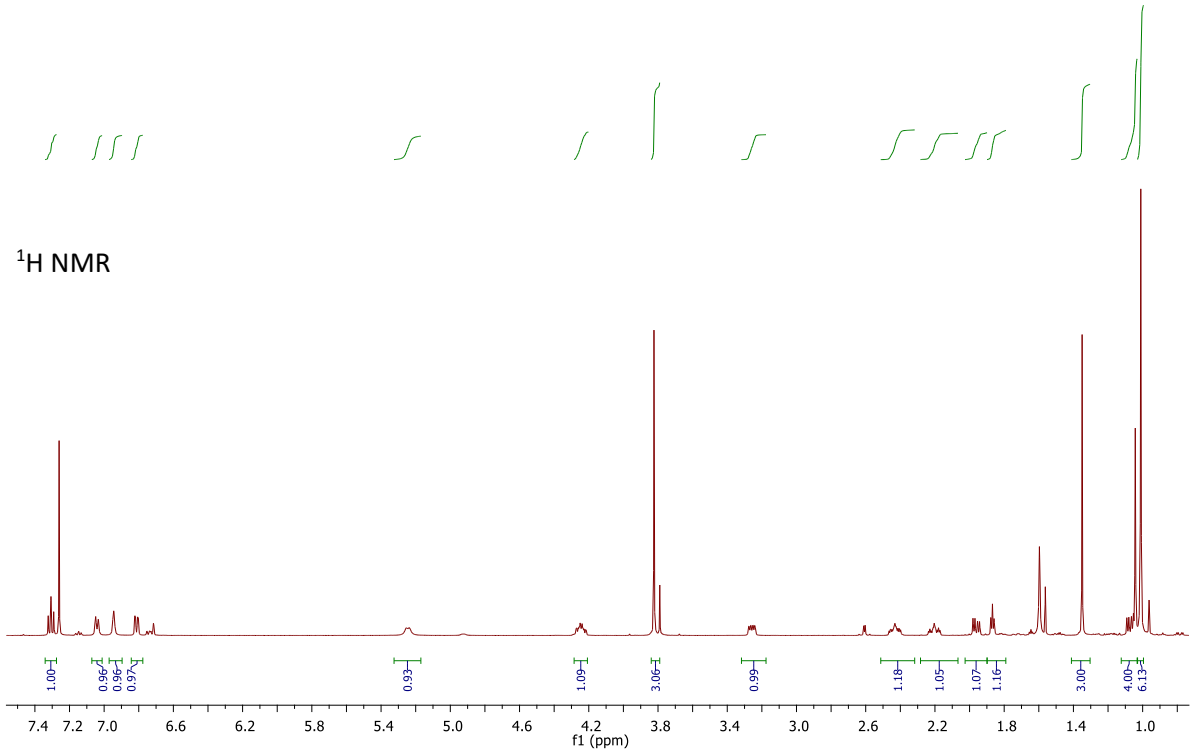

S389  
Name - Scott Rice  
Room No. - G56  
Sample - S389

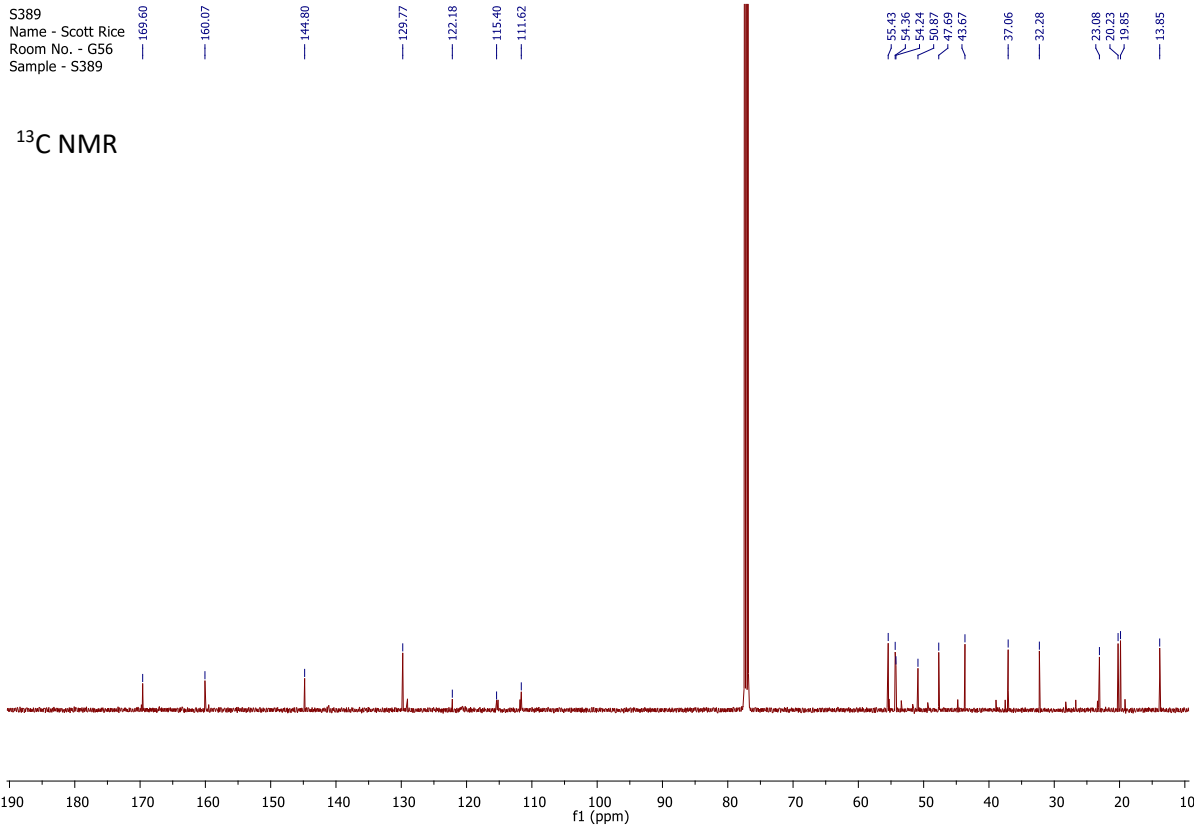

69

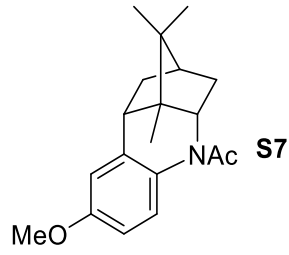

S392  
Name - Scott Rice  
Room No. - G56  
Sample - S392

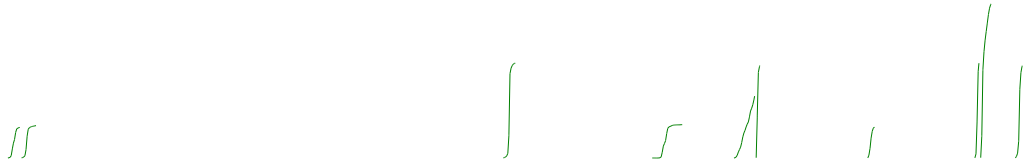

<sup>1</sup>H NMR

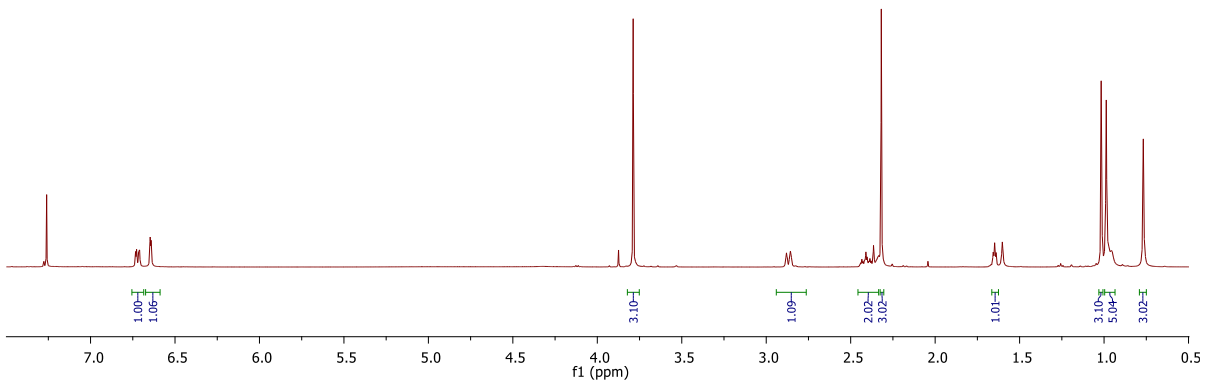

S392  
Name - Scott Rice  
Room No. - G56  
Sample - S392

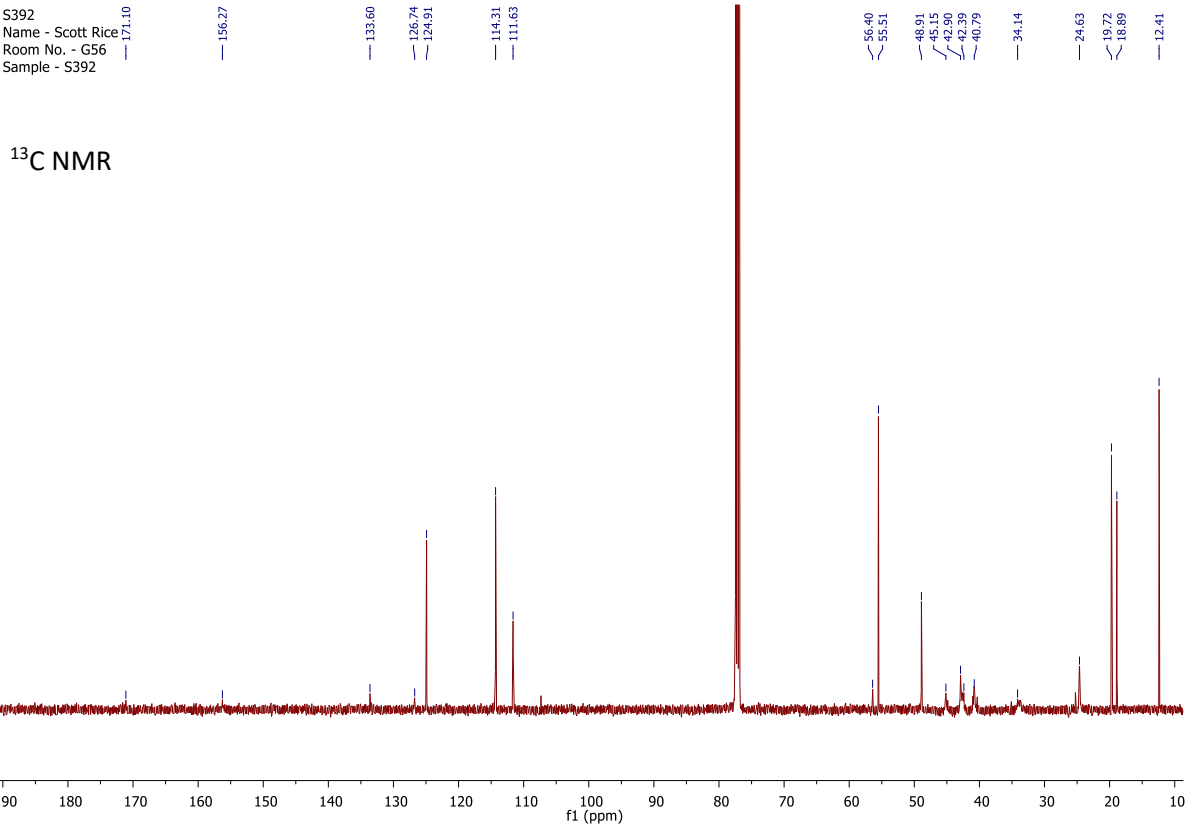

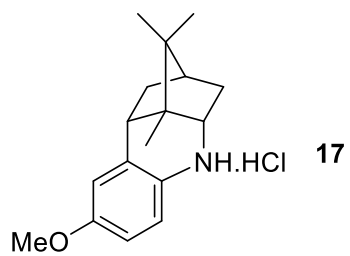

S400  
Name - Scott Rice  
Room No. - G56  
Sample - S400

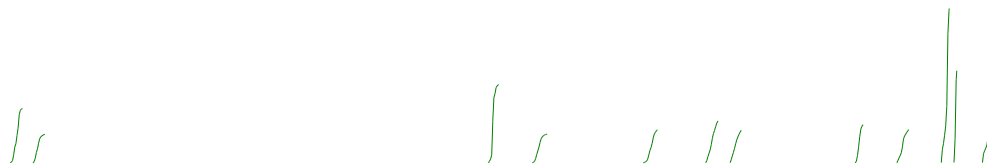<sup>1</sup>H NMR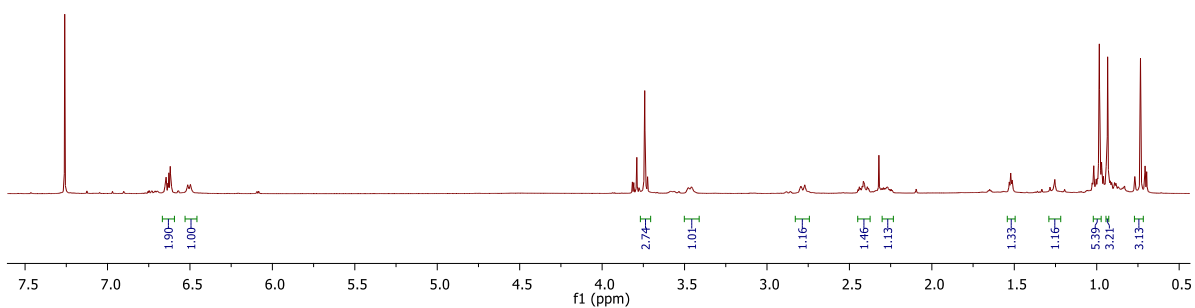

S400  
Name - Scott Rice  
Room No. - G56  
Sample - S400

<sup>13</sup>C NMR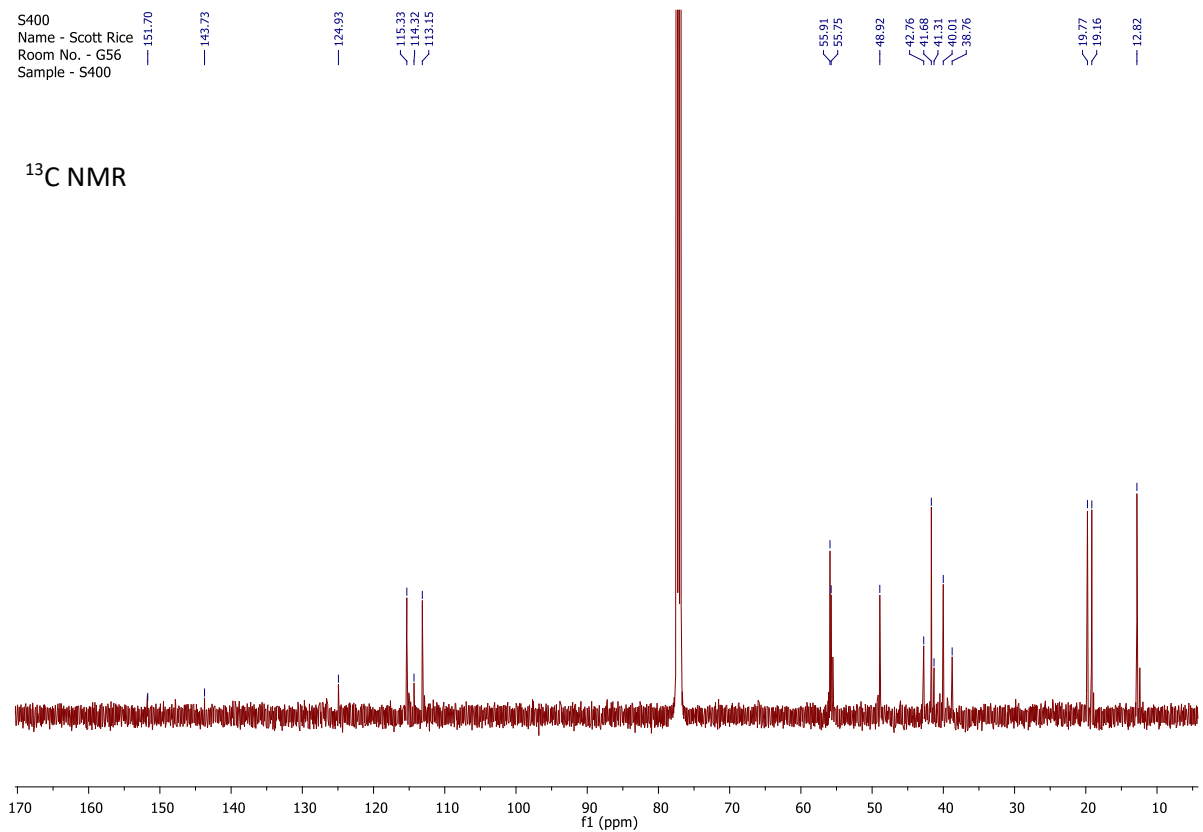

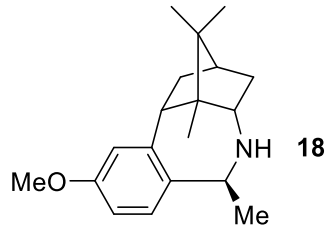

S390  
Name - Scott Rice  
Room No. - G56  
Sample - S390

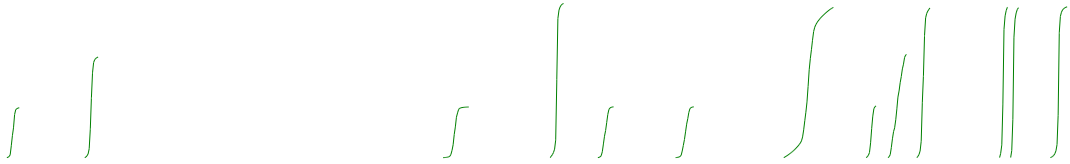**<sup>1</sup>H NMR**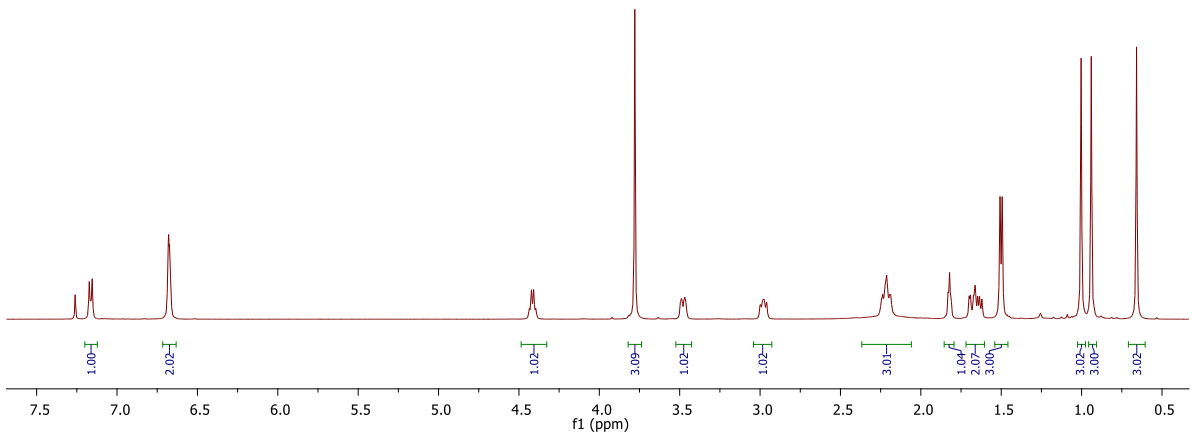

S390  
Name - Scott Rice  
Room No. - G56  
Sample - S390

157.92 142.87 138.35 125.42 119.41 110.05 63.60 55.28 52.49 49.22 46.43 45.10 43.26 33.54 32.07 21.55 19.88 19.79 12.98

**<sup>13</sup>C NMR**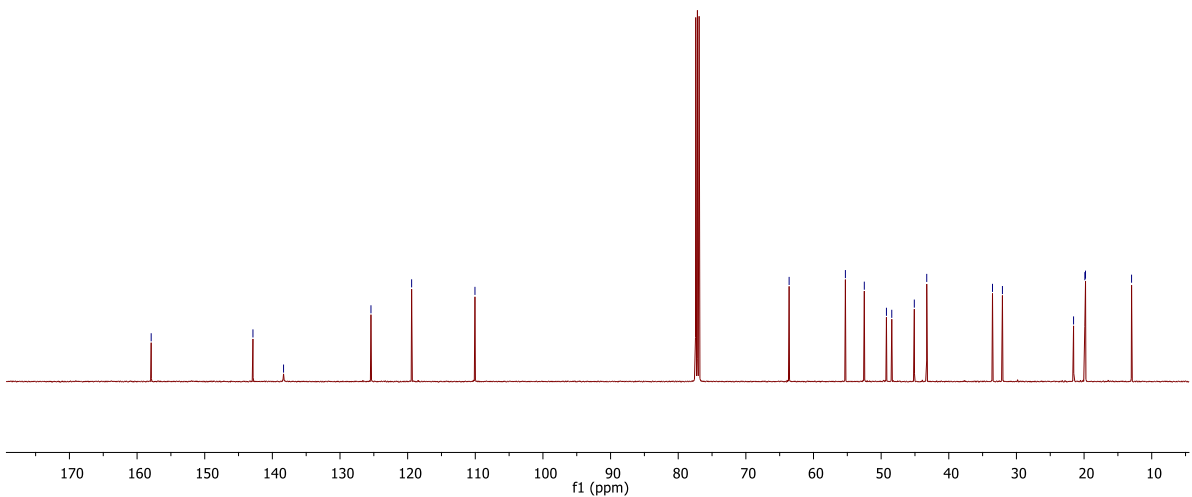



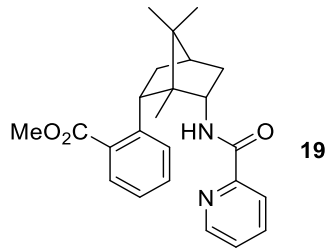

S397  
Name - Scott Rice  
Room No. - G56  
Sample - S397

**<sup>1</sup>H NMR**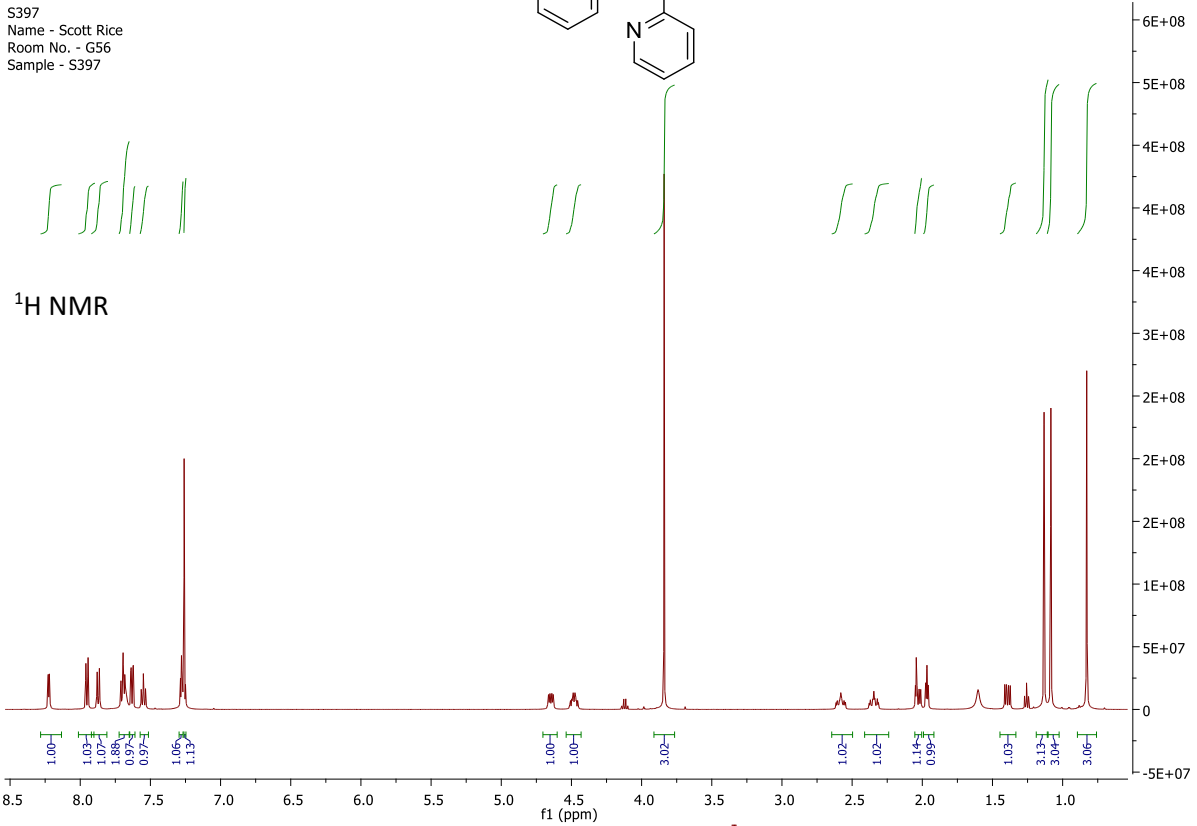

S397  
Name - Scott Rice  
Room No. - G56  
Sample - S397

**<sup>13</sup>C NMR**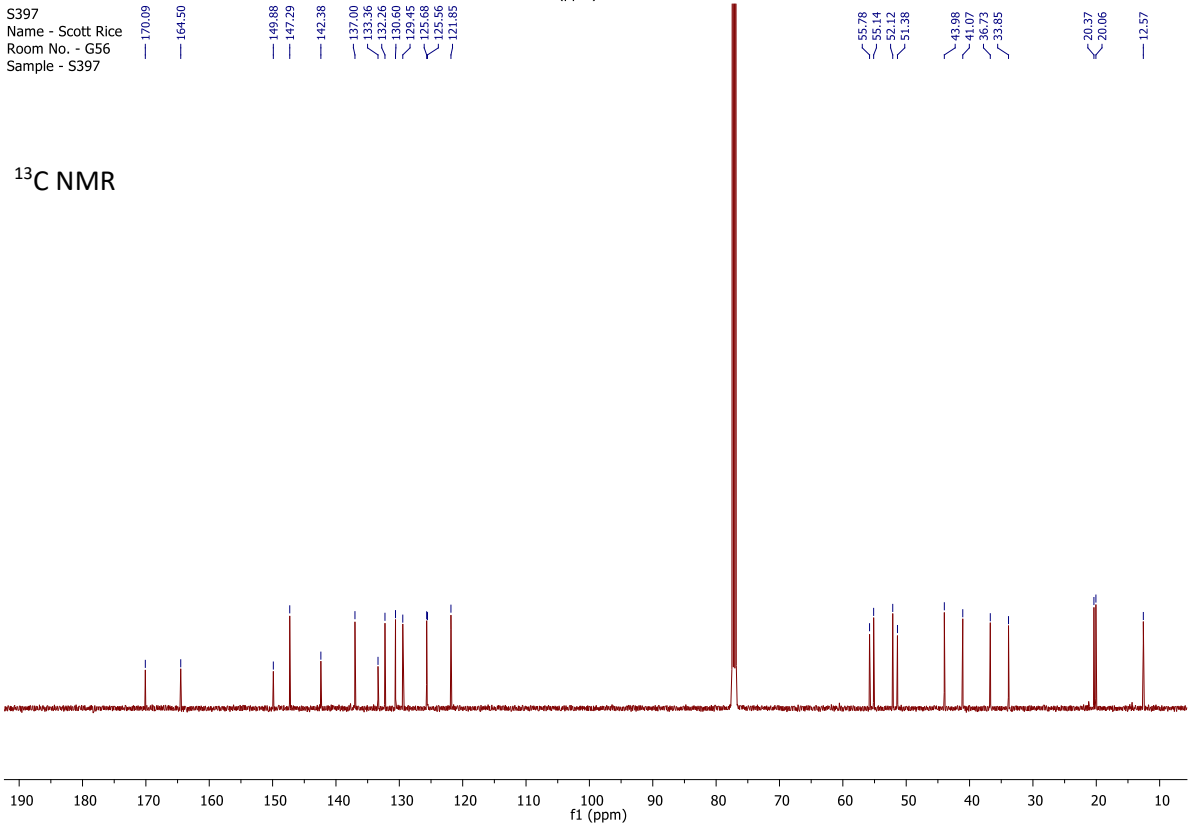

S398  
Name - Scott Rice  
Room No. - G56  
Sample - S398

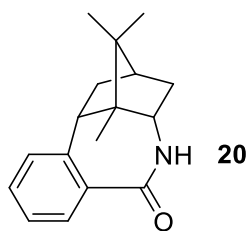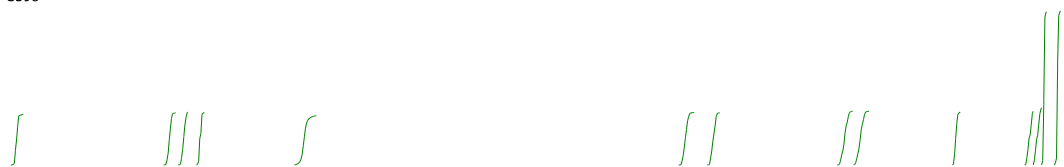**<sup>1</sup>H NMR**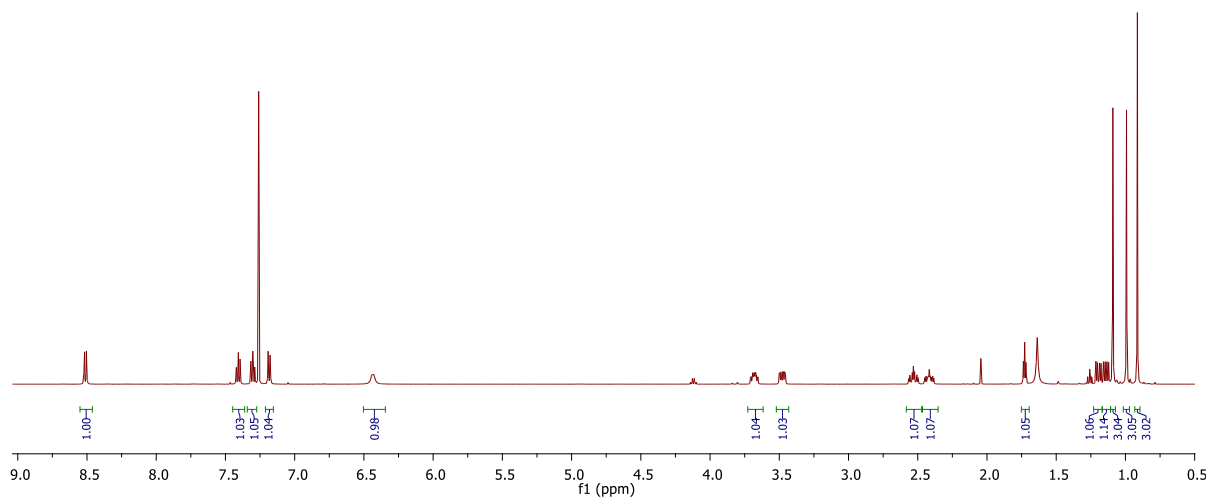

S398  
Name - Scott Rice  
Room No. - G56  
Sample - S398

**<sup>13</sup>C NMR**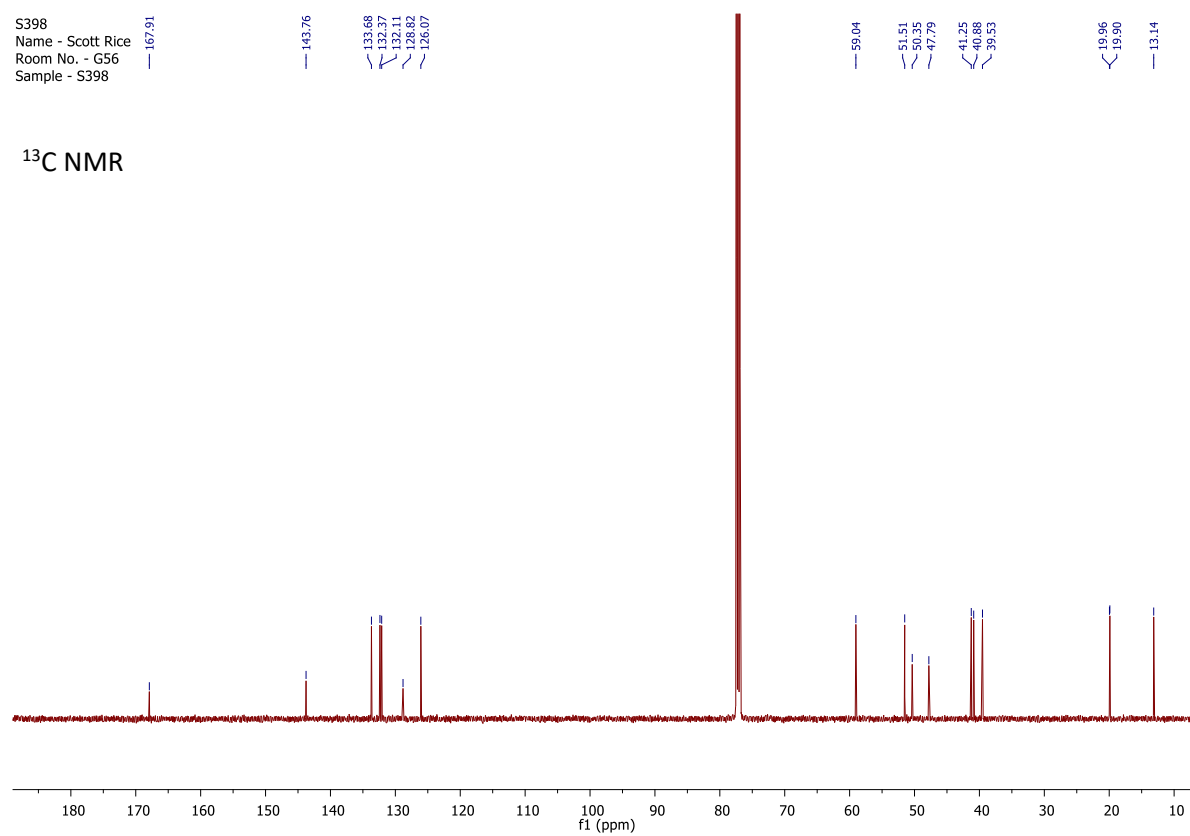

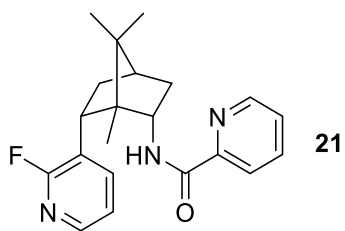

S395  
Name - Scott Rice  
Room No. - G56  
Sample - S395

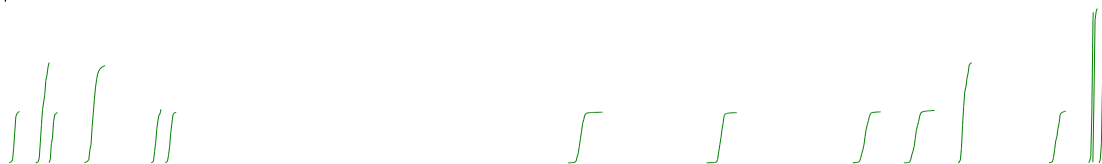**<sup>1</sup>H NMR**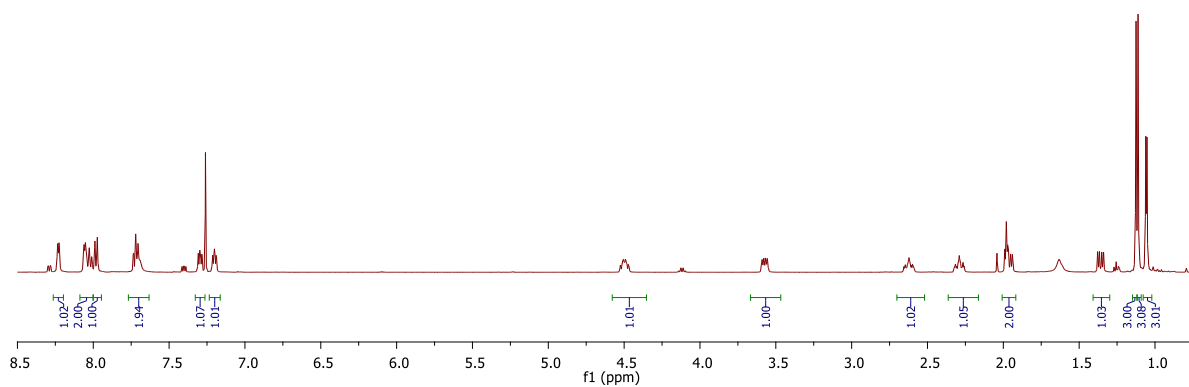

S395  
Name - Scott Rice  
Room No. - G56  
Sample - S395

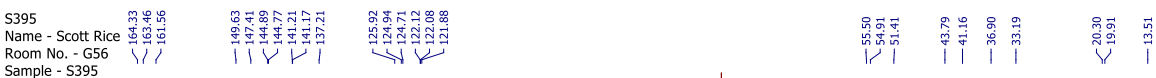**<sup>13</sup>C NMR**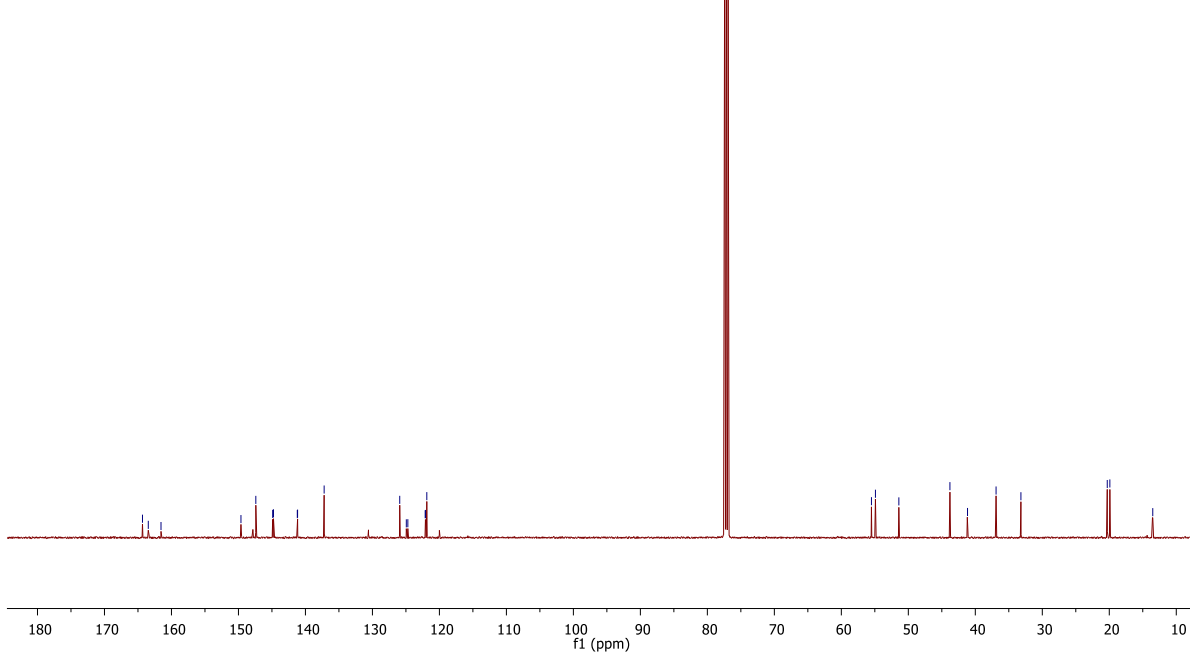

S395  
Name - Scott Rice  
Room No - G56  
Sample S395

$^{19}\text{F}$  NMR

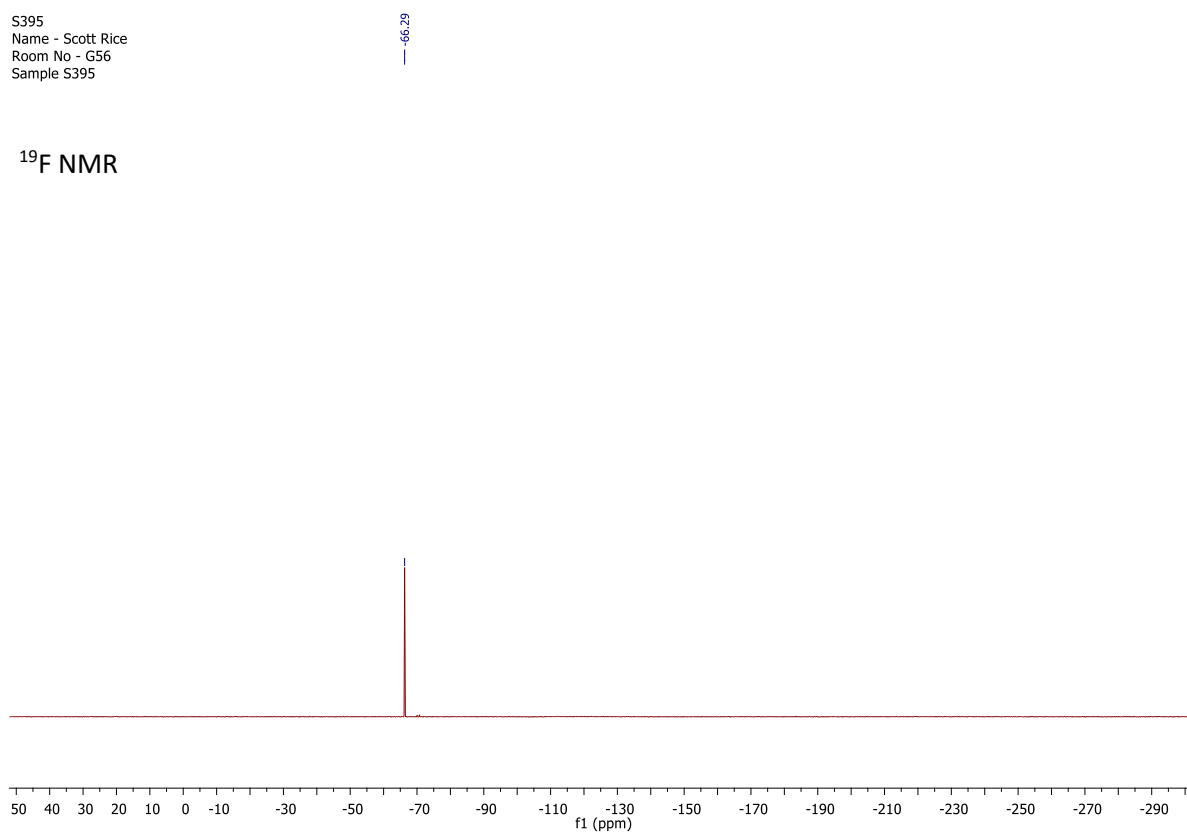

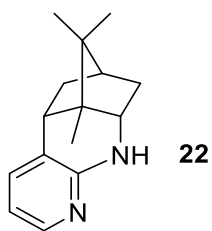

S396  
Name - Scott Rice  
Room No. - G56  
Sample - S396

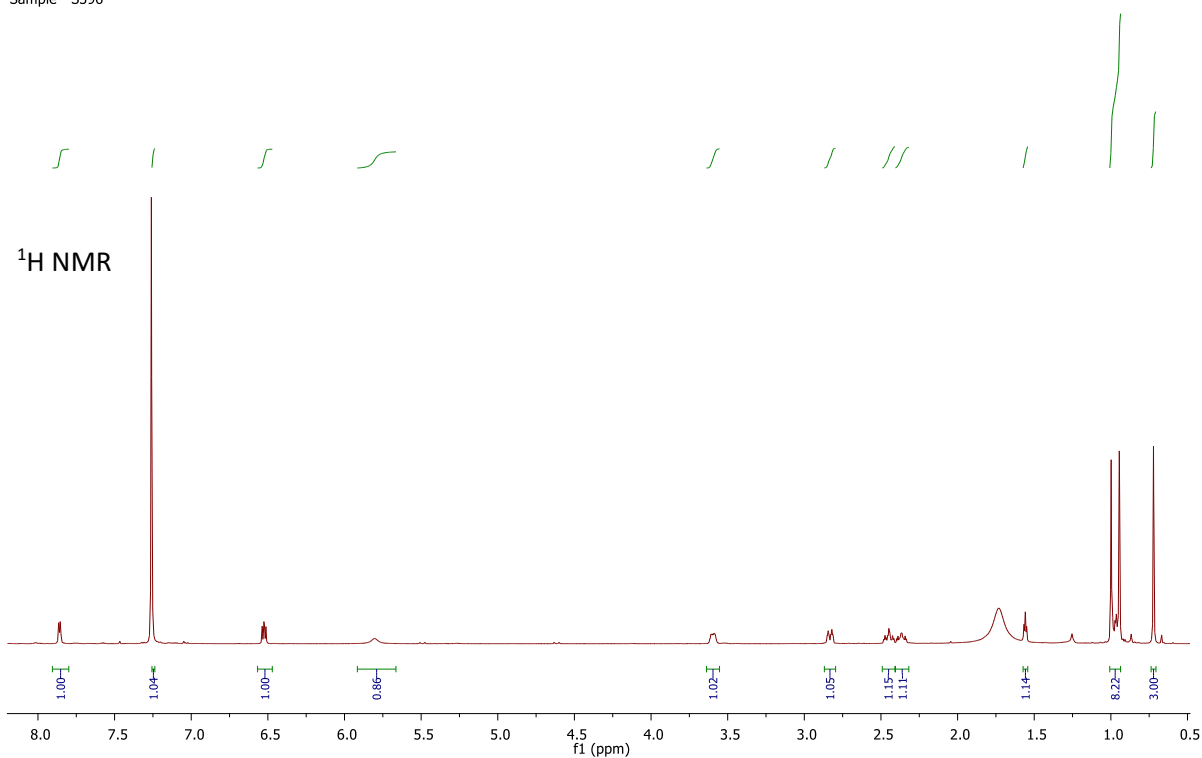

S396  
Name - Scott Rice  
Room No. - G56  
Sample - S396

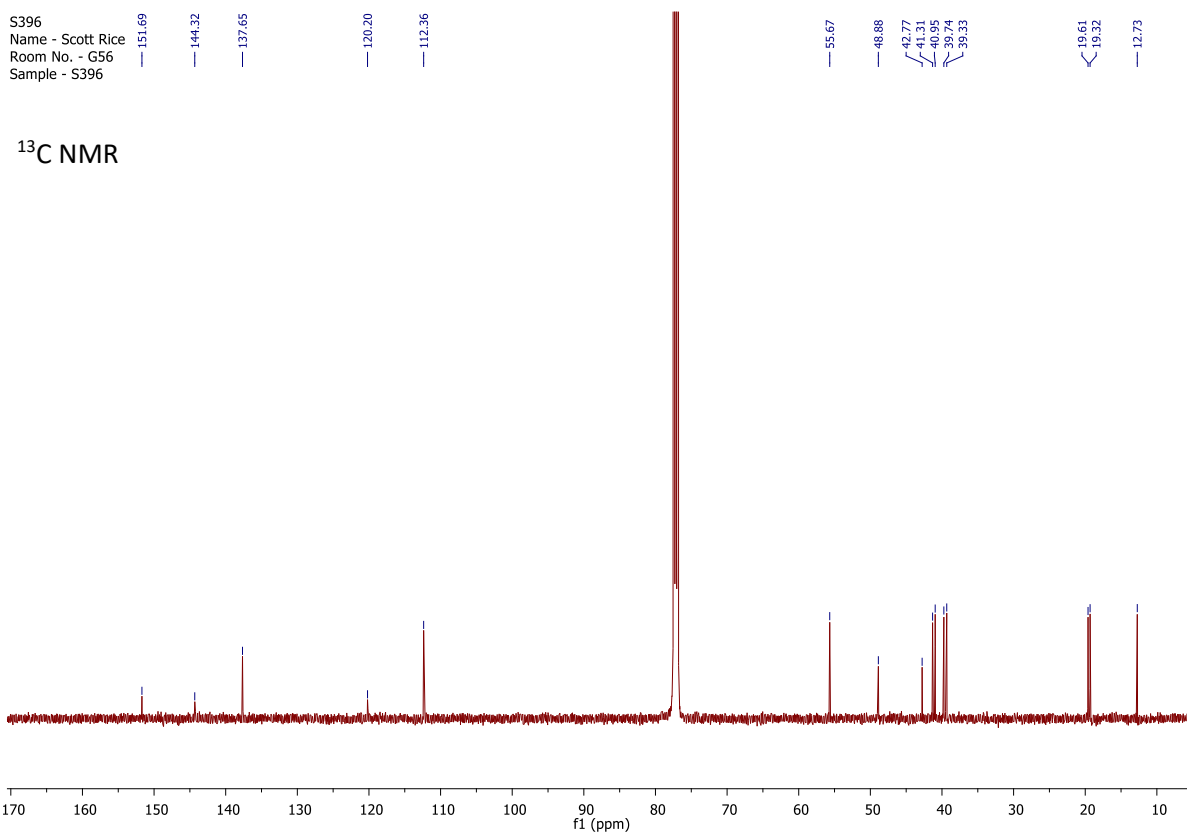

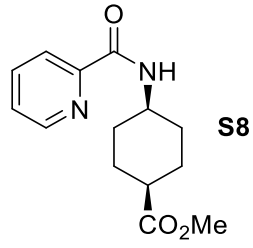

S431  
Name - Scott Rice  
Room No. - G56  
Sample - S431

<sup>1</sup>H NMR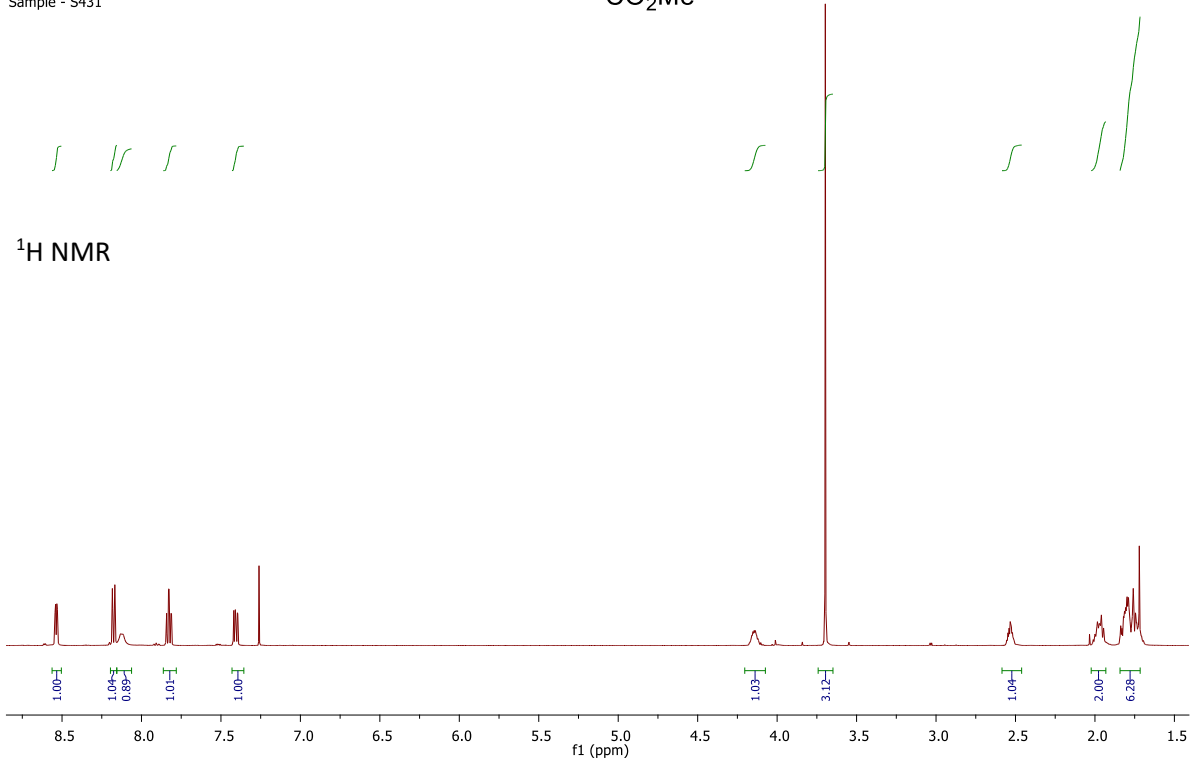

S431  
Name - Scott Rice  
Room No. - G56  
Sample - S431

<sup>13</sup>C NMR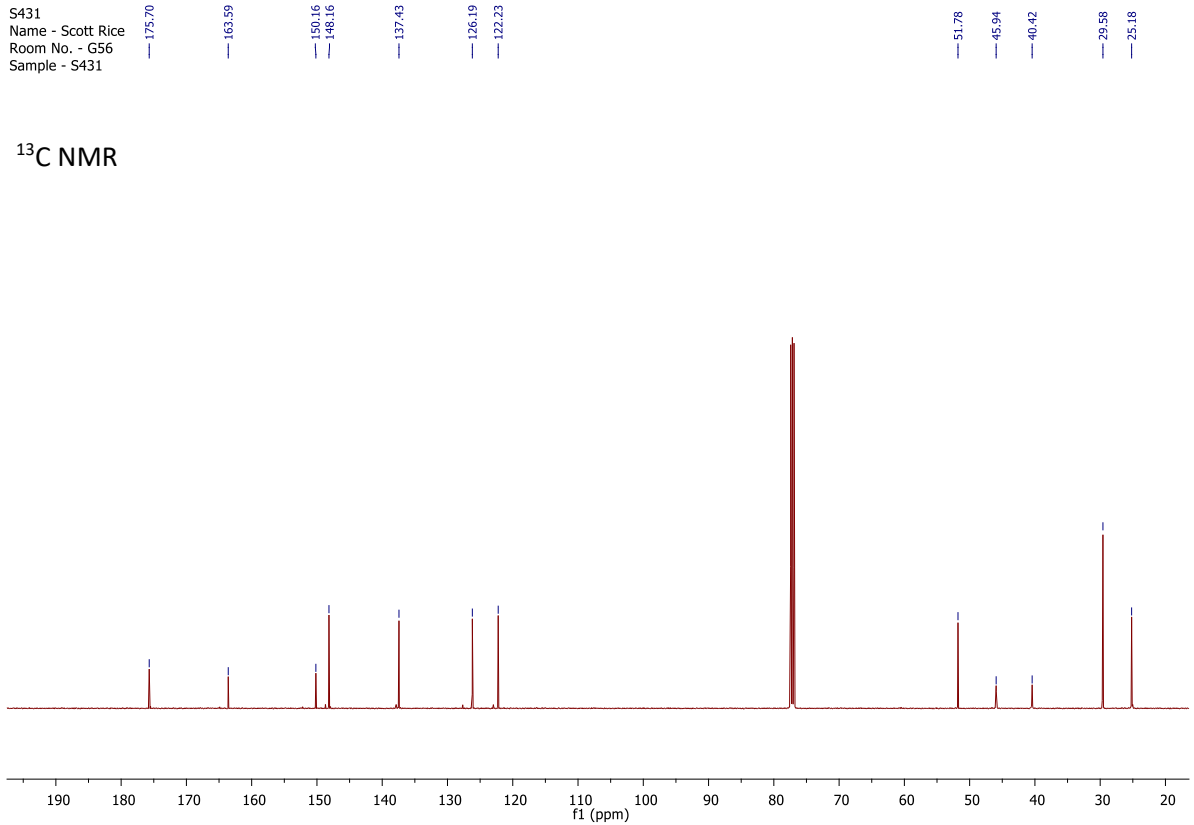

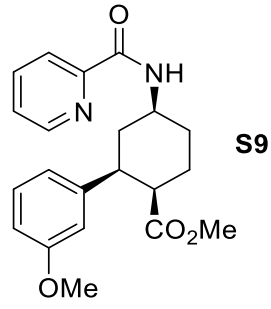

S432  
Name - Scott Rice  
Room No. - G56  
Sample - S432

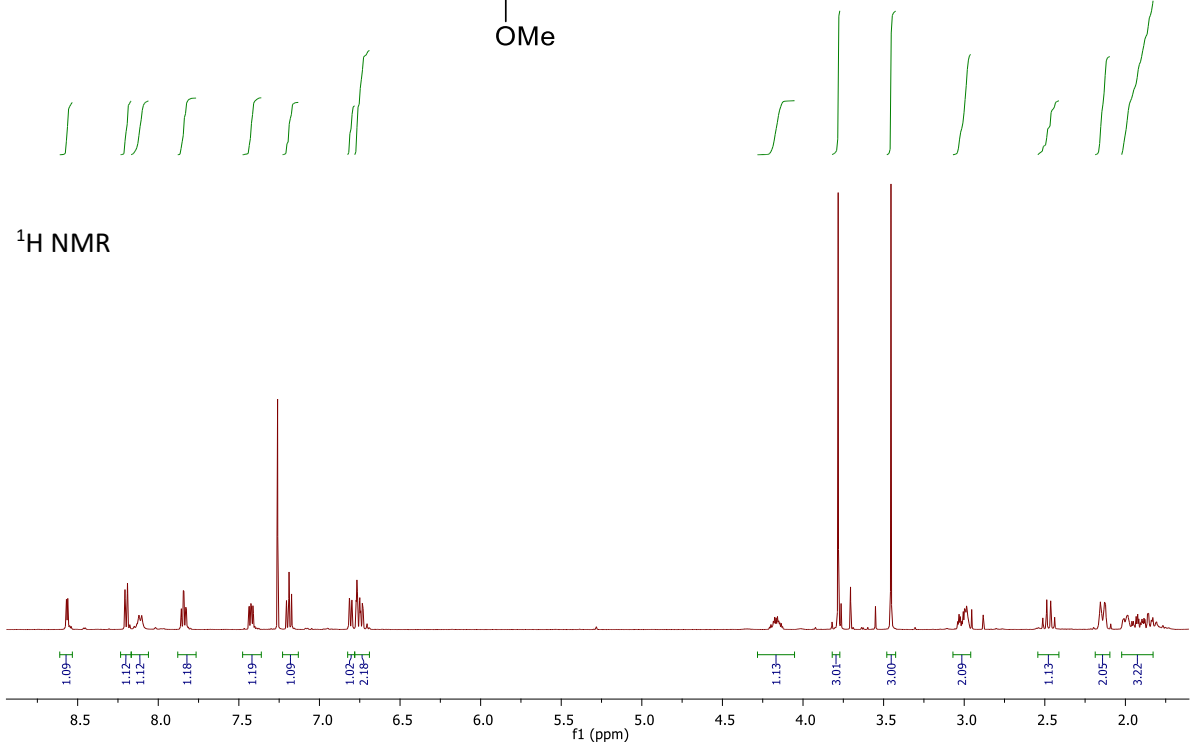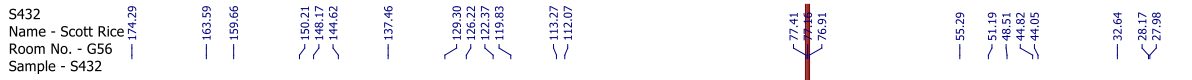

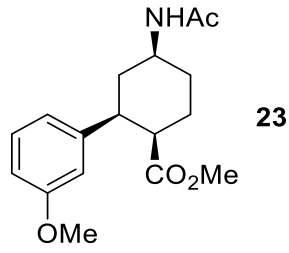

S433  
Name - Scott Rice  
Room No. - G56  
Sample - S433

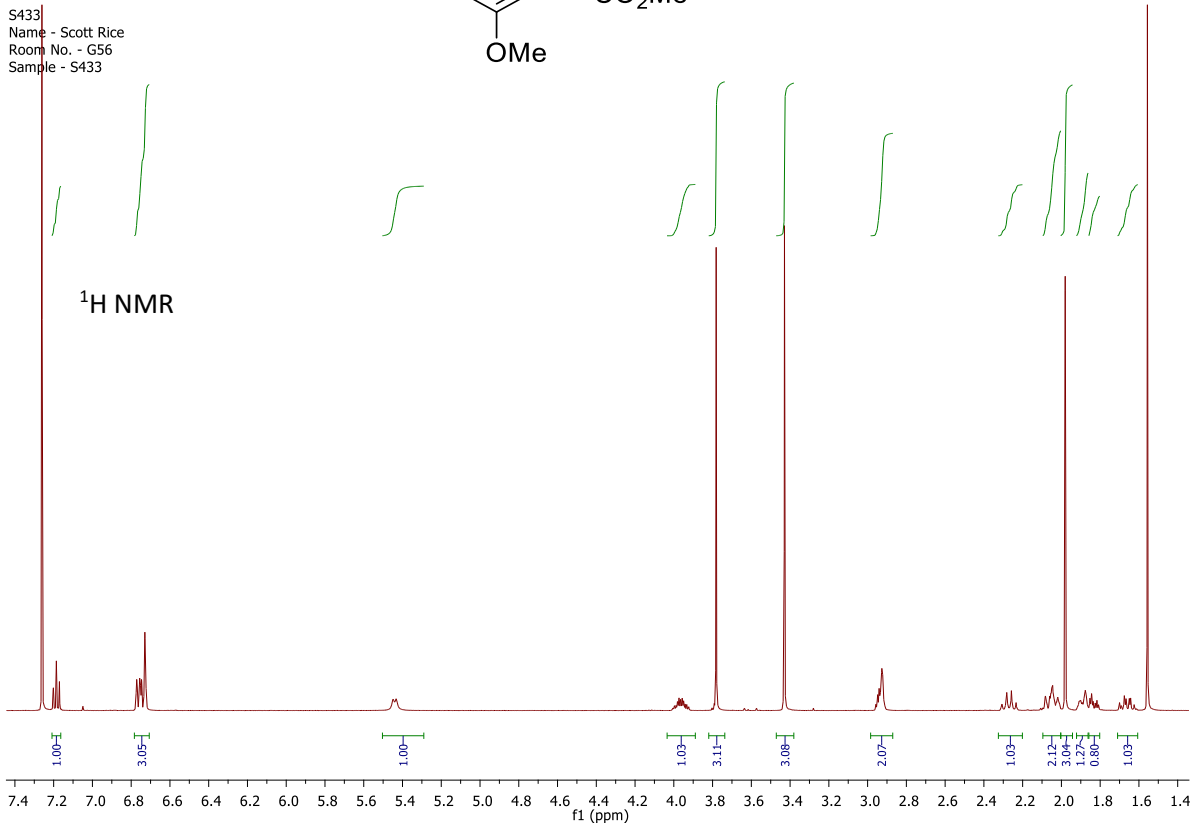

S433  
Name - Scott Rice  
Room No. - G56  
Sample - S433

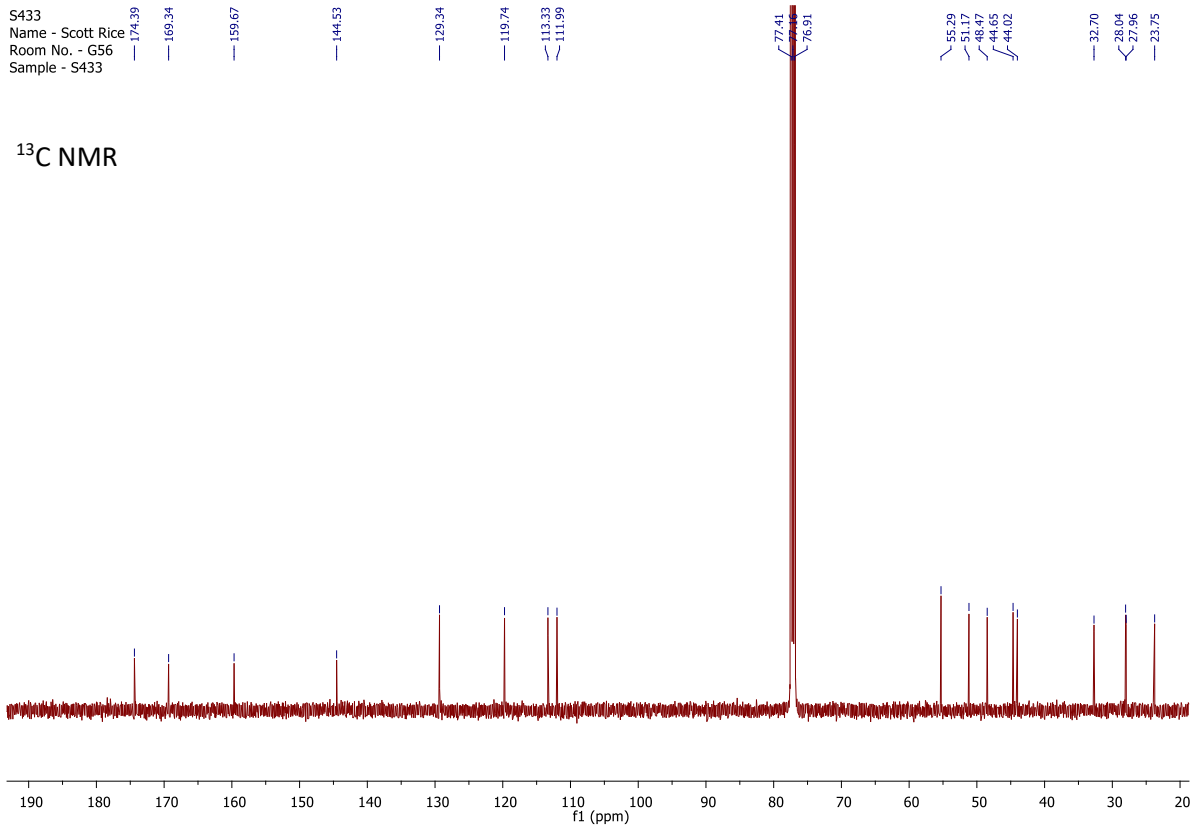



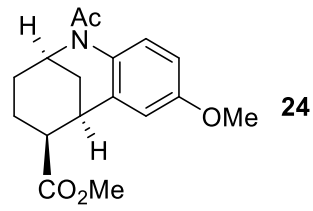

S439  
Name - Scott Rice  
Room No. - G56  
Sample - S439

 $^1\text{H}$  NMR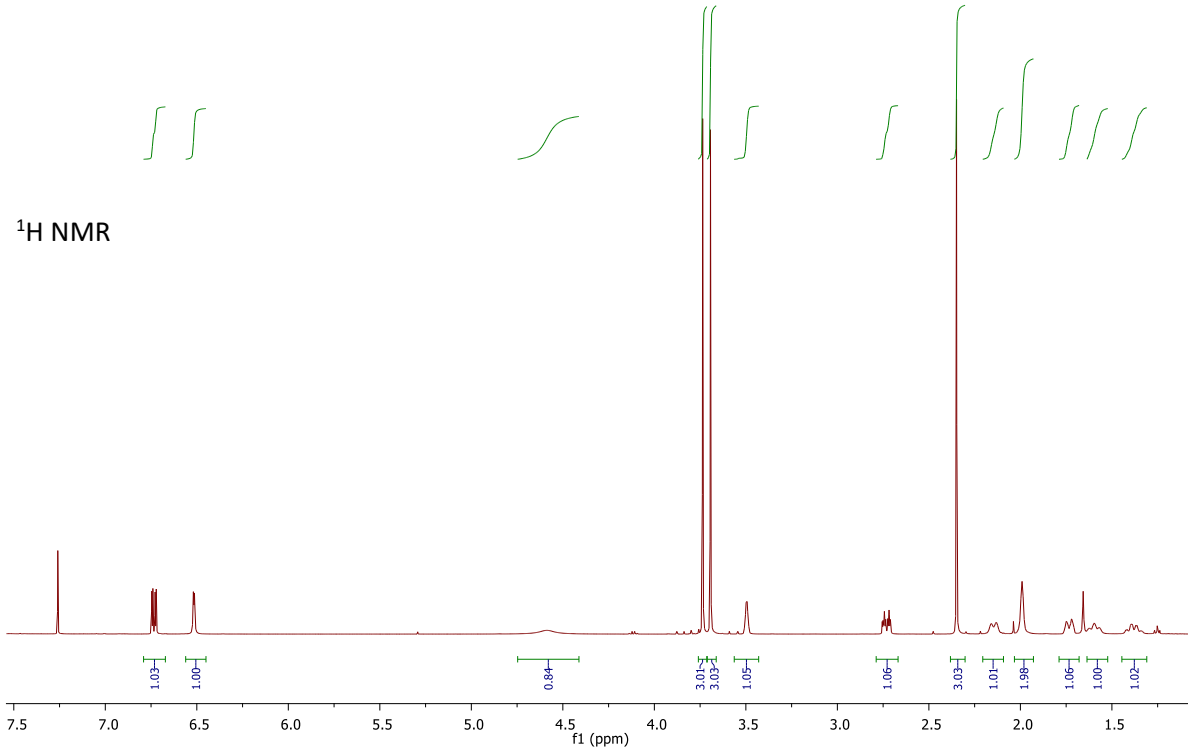

S439  
Name - Scott Rice  
Room No. - G56  
Sample - S439

 $^{13}\text{C}$  NMR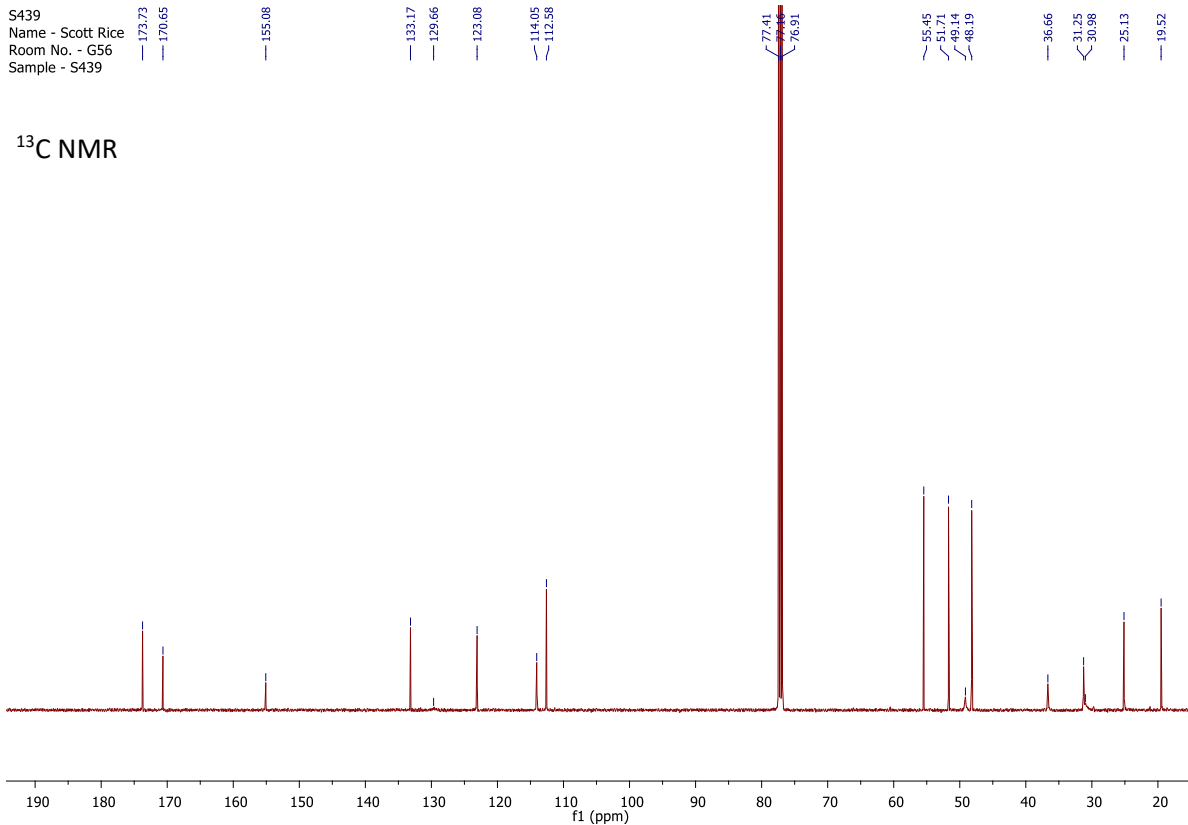

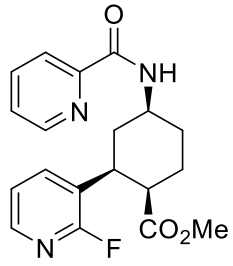

S436  
Name - Scott Rice  
Room No. - G56  
Sample - S436

**<sup>1</sup>H NMR**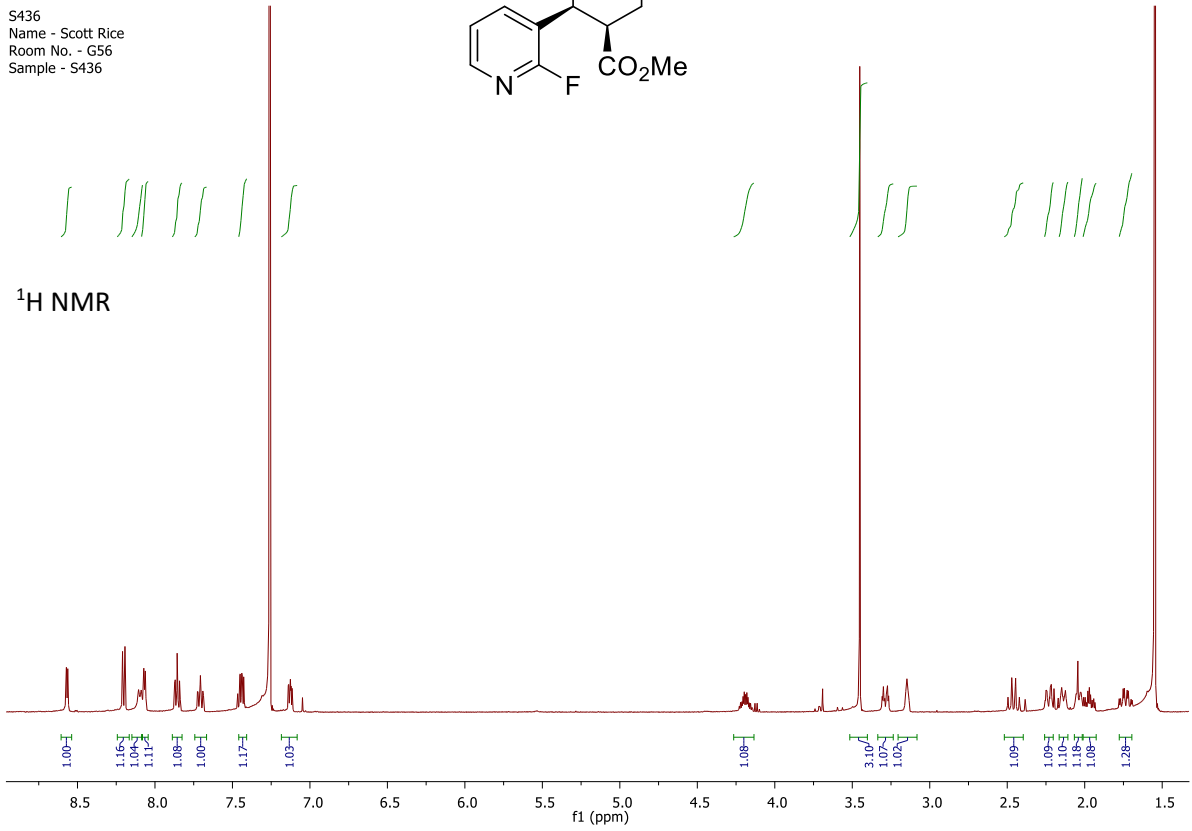

S436  
Name - Scott Rice  
Room No. - G56  
Sample - S436

**<sup>13</sup>C NMR**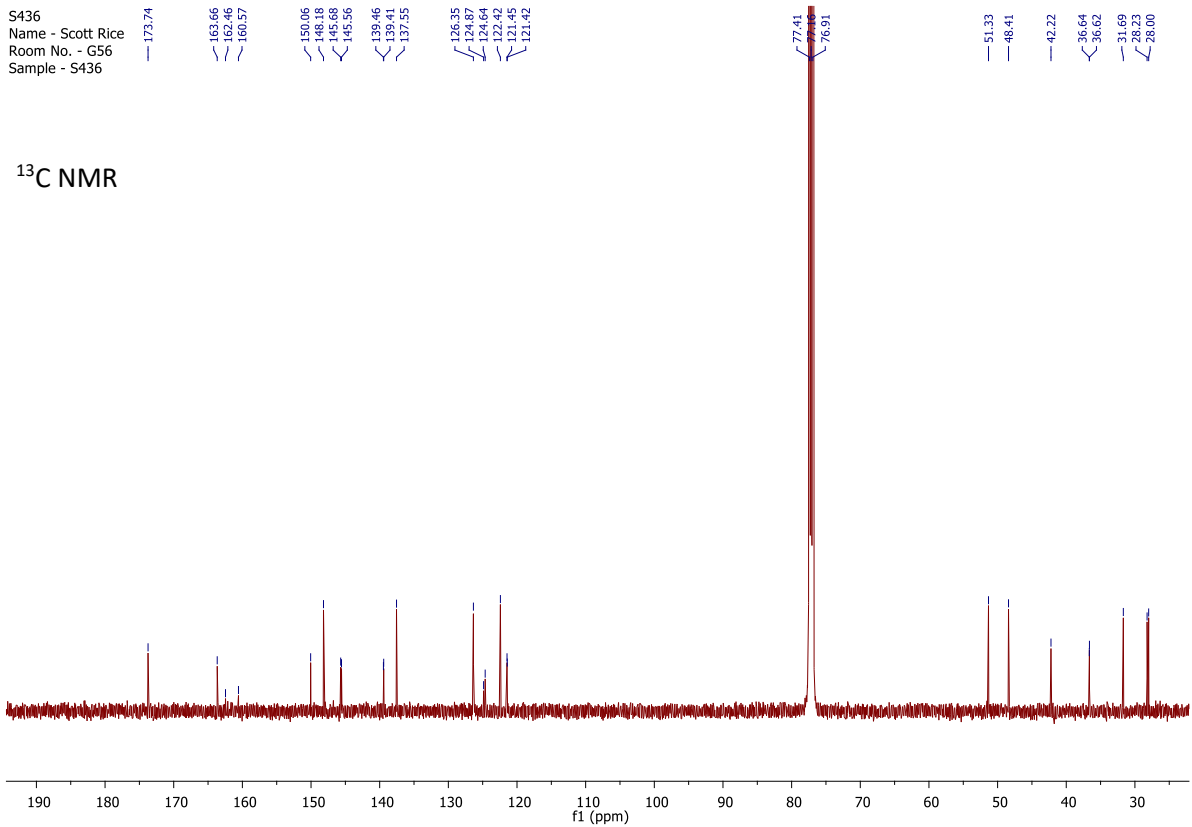

S436  
Name - Scott Rice  
Room No - G56  
Sample S436

-72.50

$^{19}\text{F}$  NMR

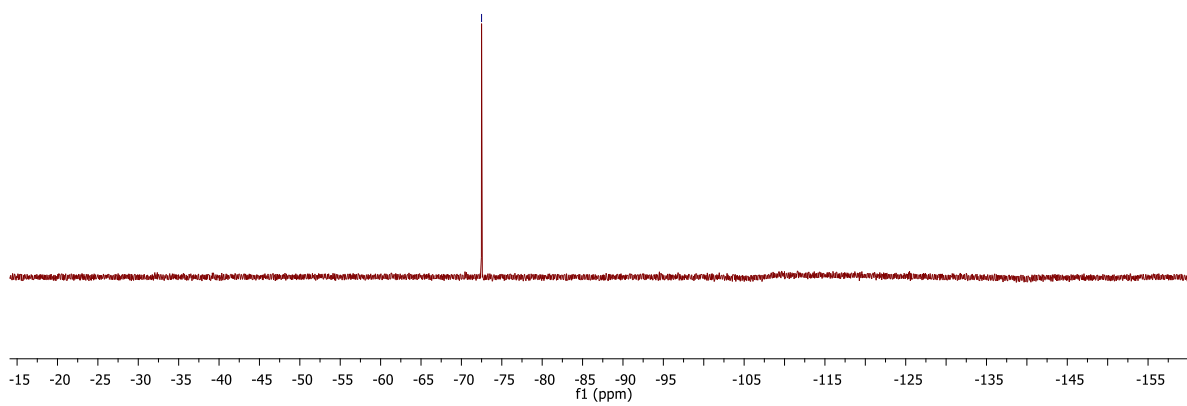

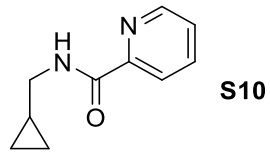

S405  
Name - Scott Rice  
Room No. - G56  
Sample - S405

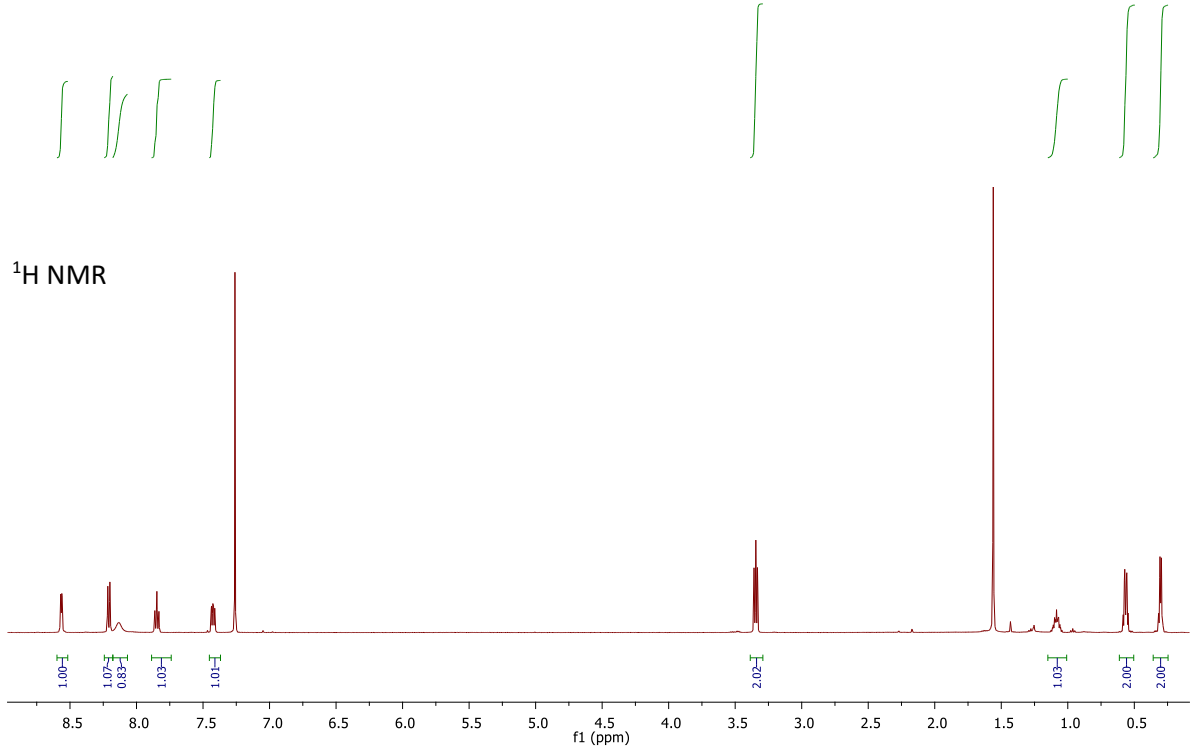

S405  
Name - Scott Rice  
Room No. - G56  
Sample - S405

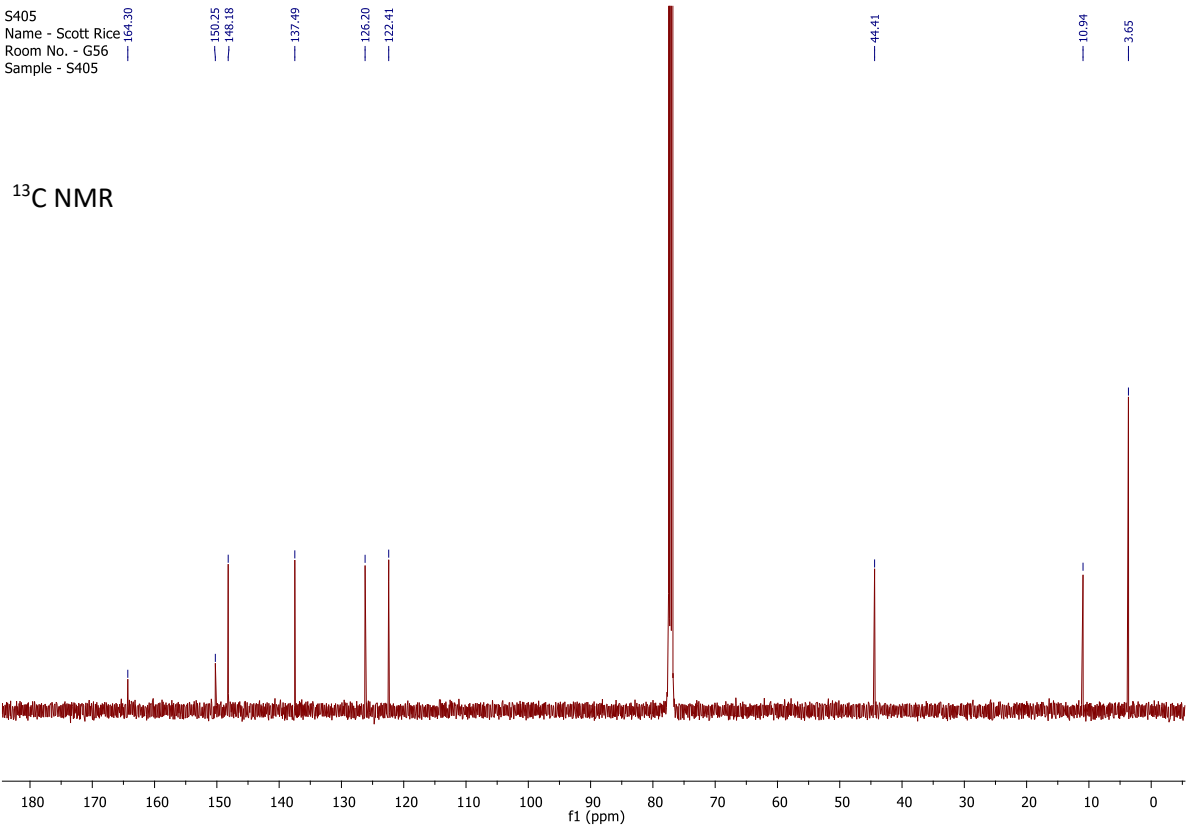

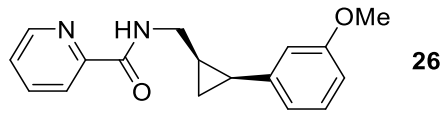

S412  
Name - Scott Rice  
Room No. - G56  
Sample - S412

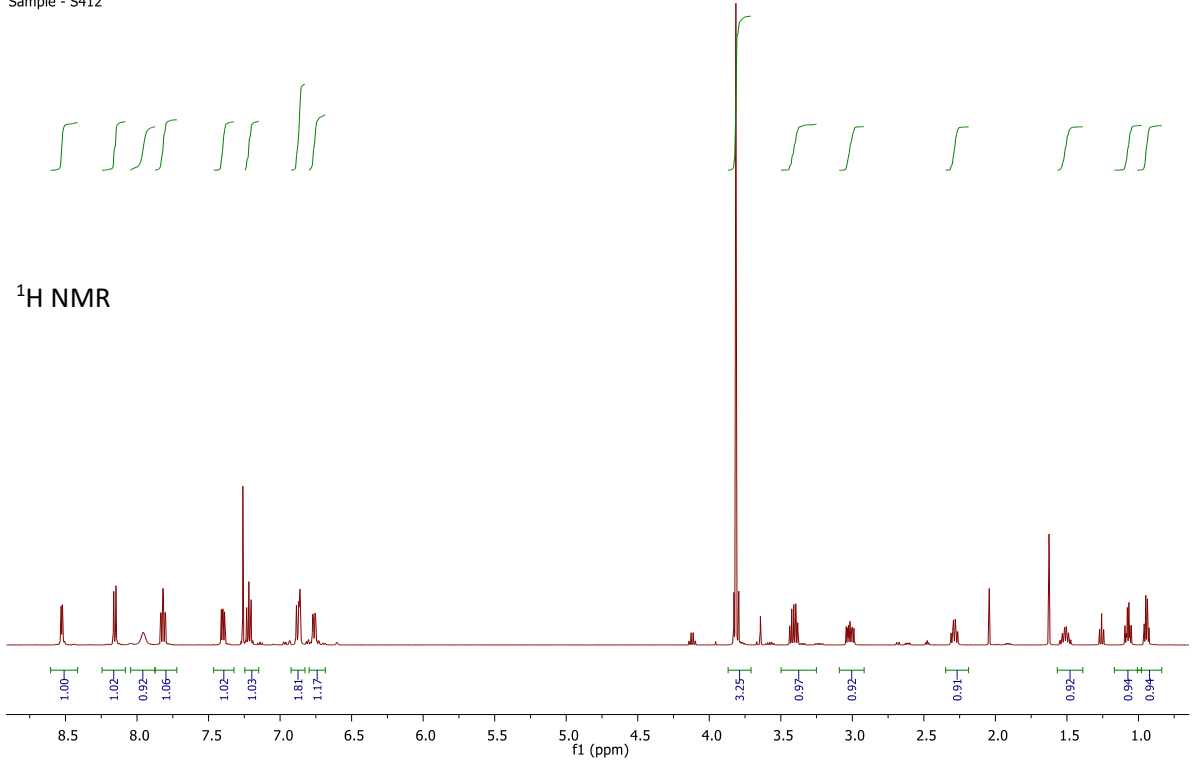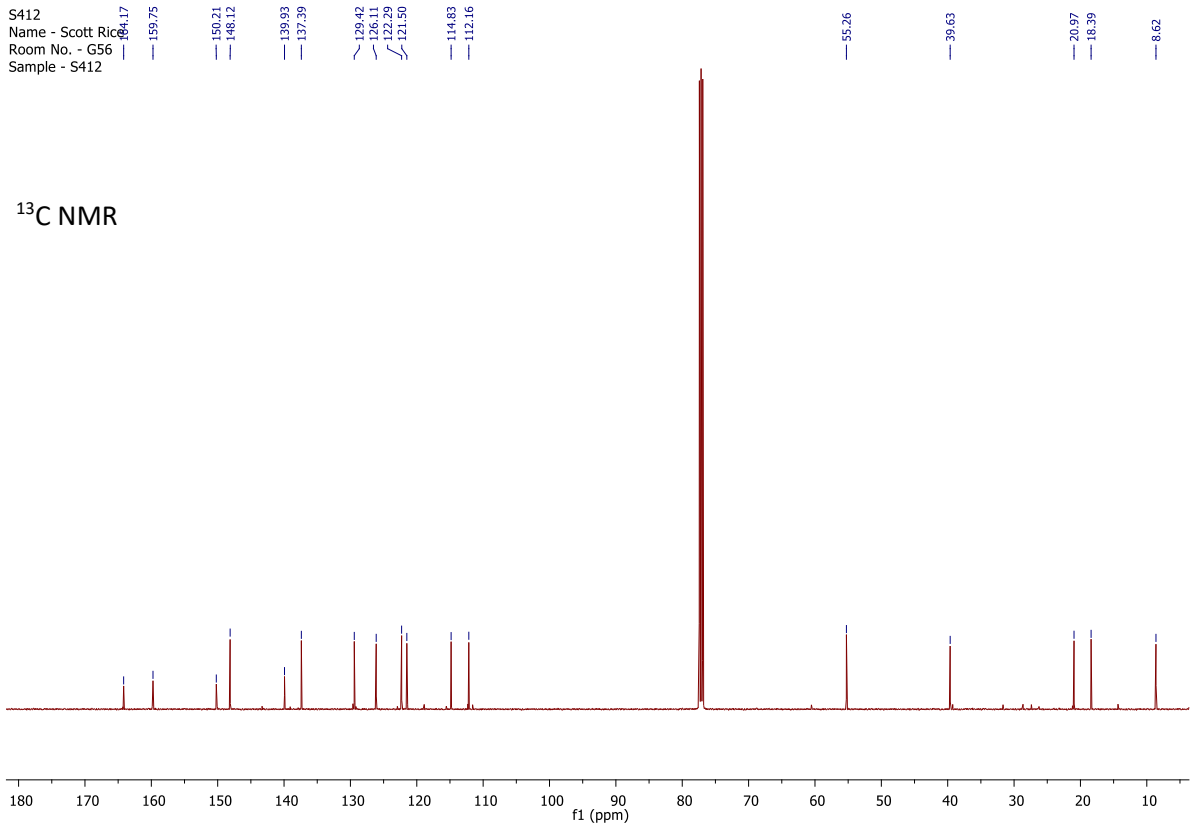

NOESY

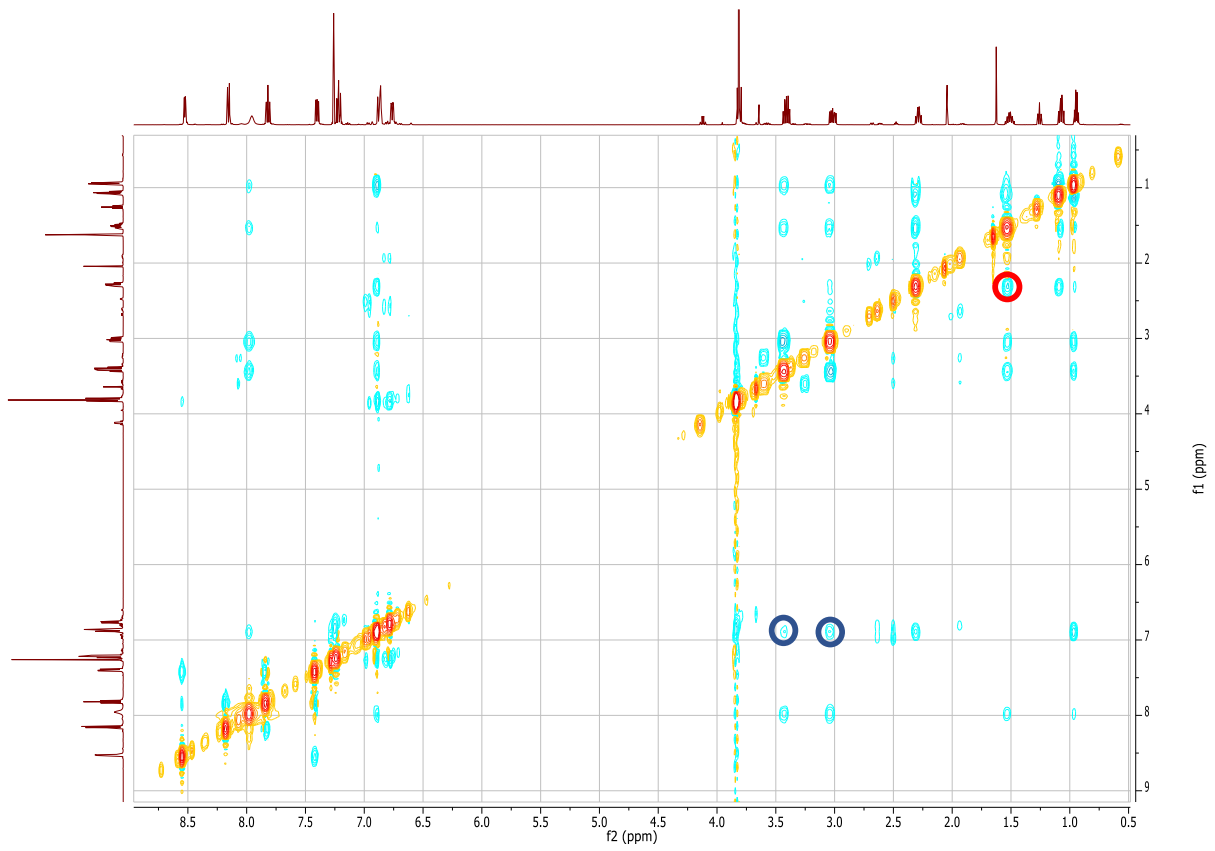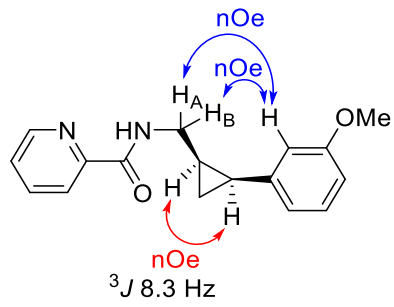

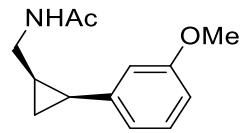

S11

S413  
Name - Scott Rice  
Room No. - G56  
Sample - S413

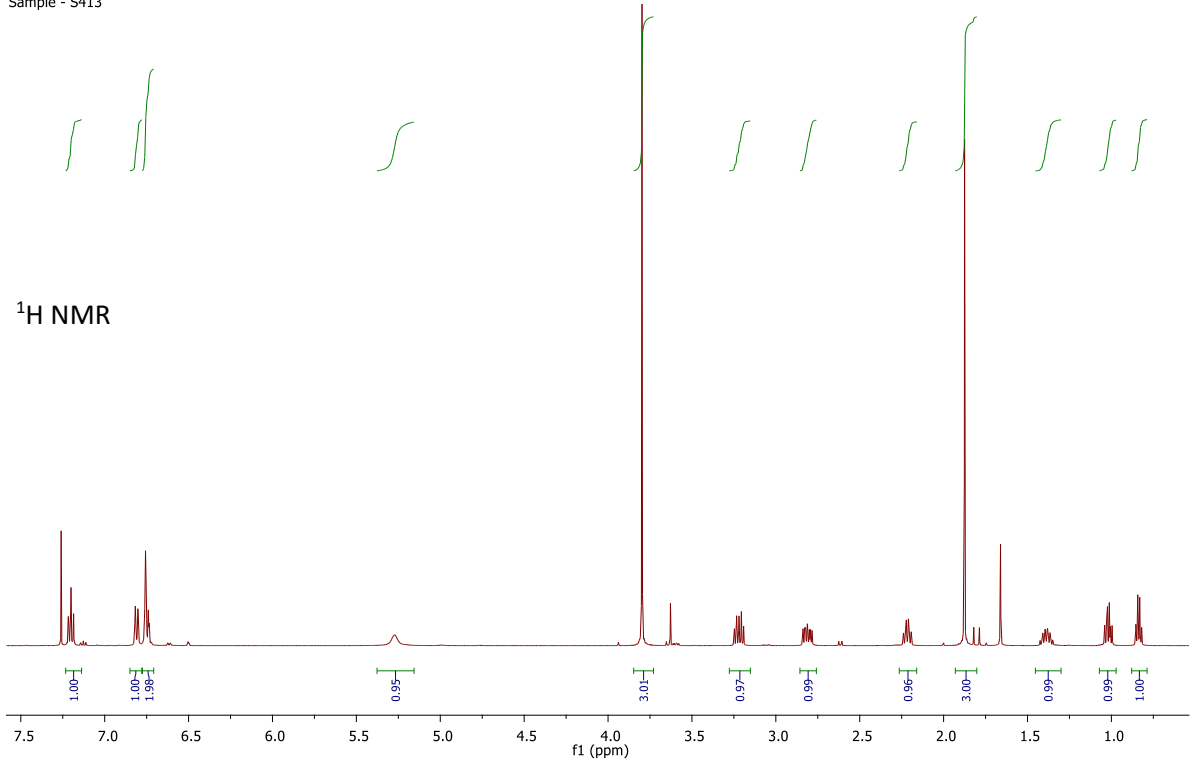

S413  
Name - Scott Rice  
Room No. - G56  
Sample - S413

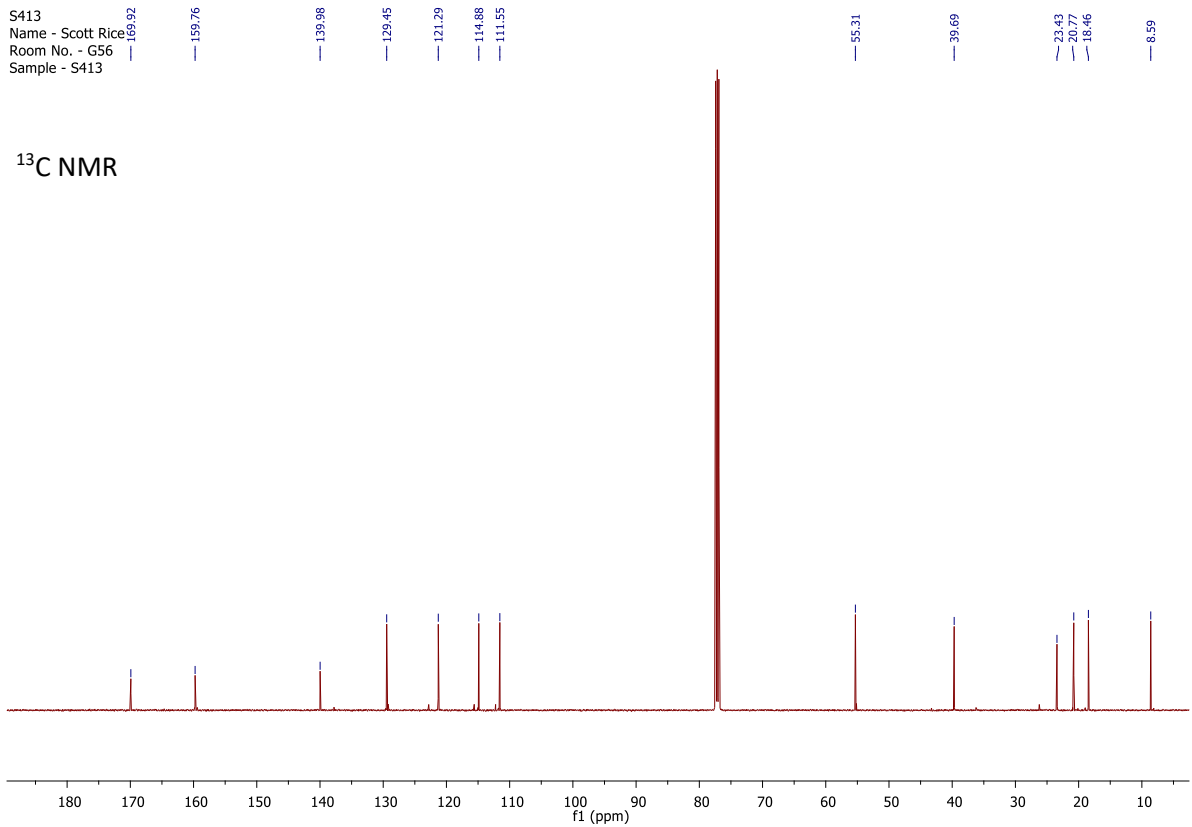

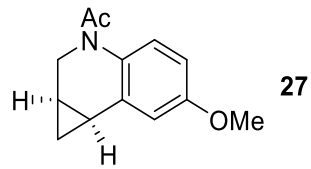

S430  
Name - Scott Rice  
Room No - G56  
Sample S430

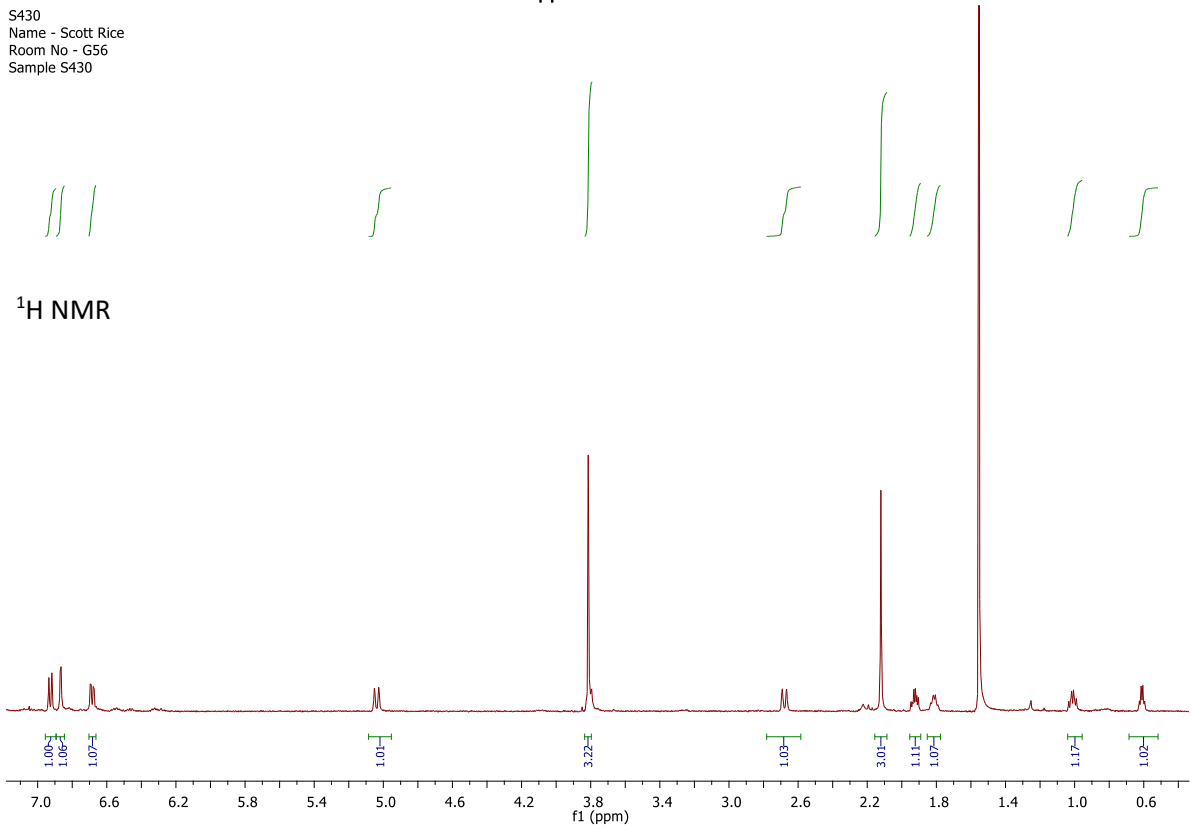

S430  
Name - Scott Rice  
Room No. - G56  
Sample - S430

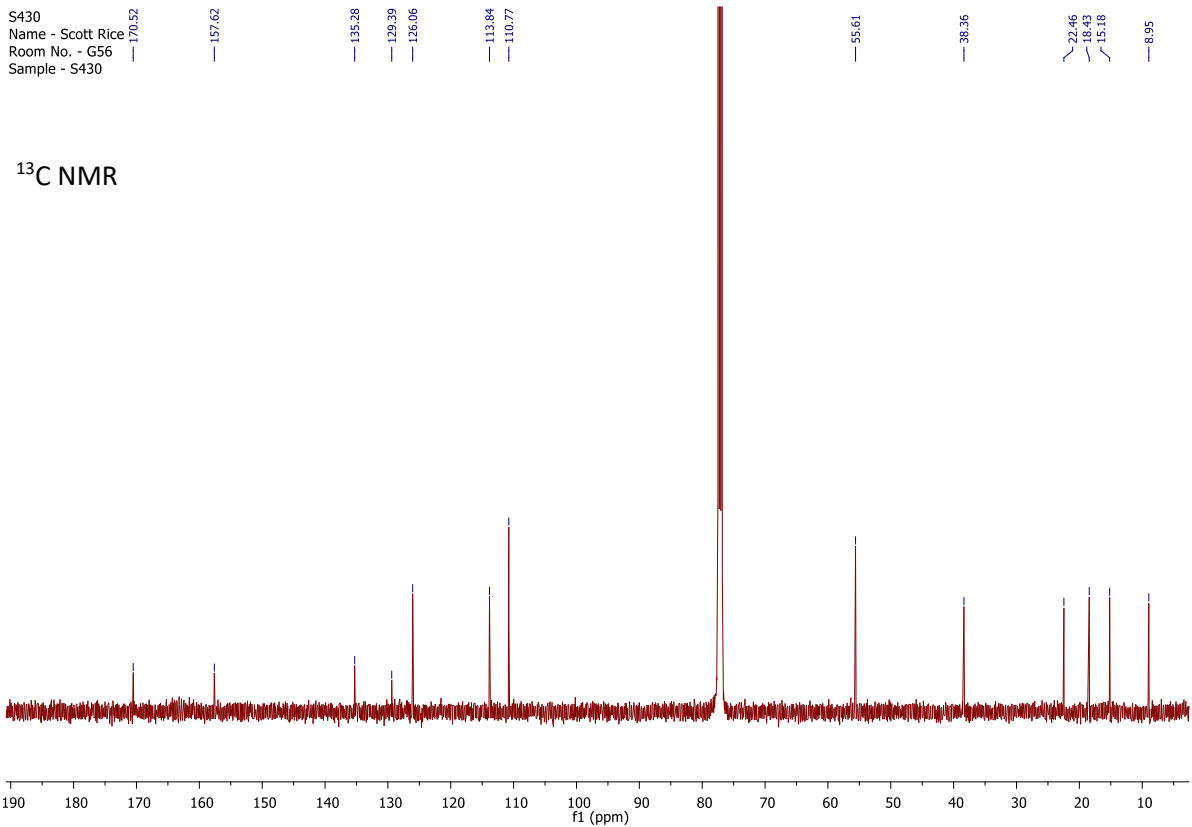



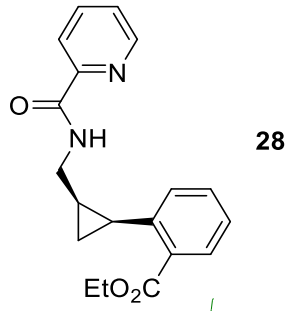

S415  
Name - Scott Rice  
Room No. - G56  
Sample - S415

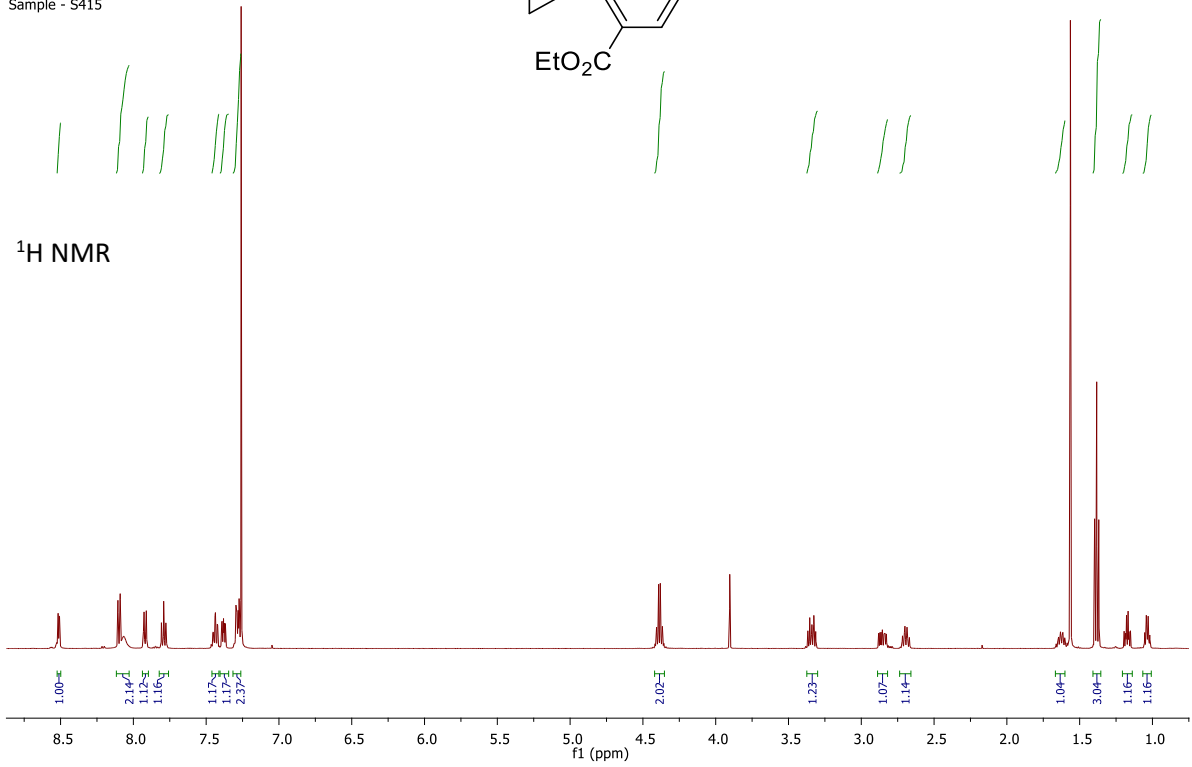

S415  
Name - Scott Rice  
Room No. - G56  
Sample - S415

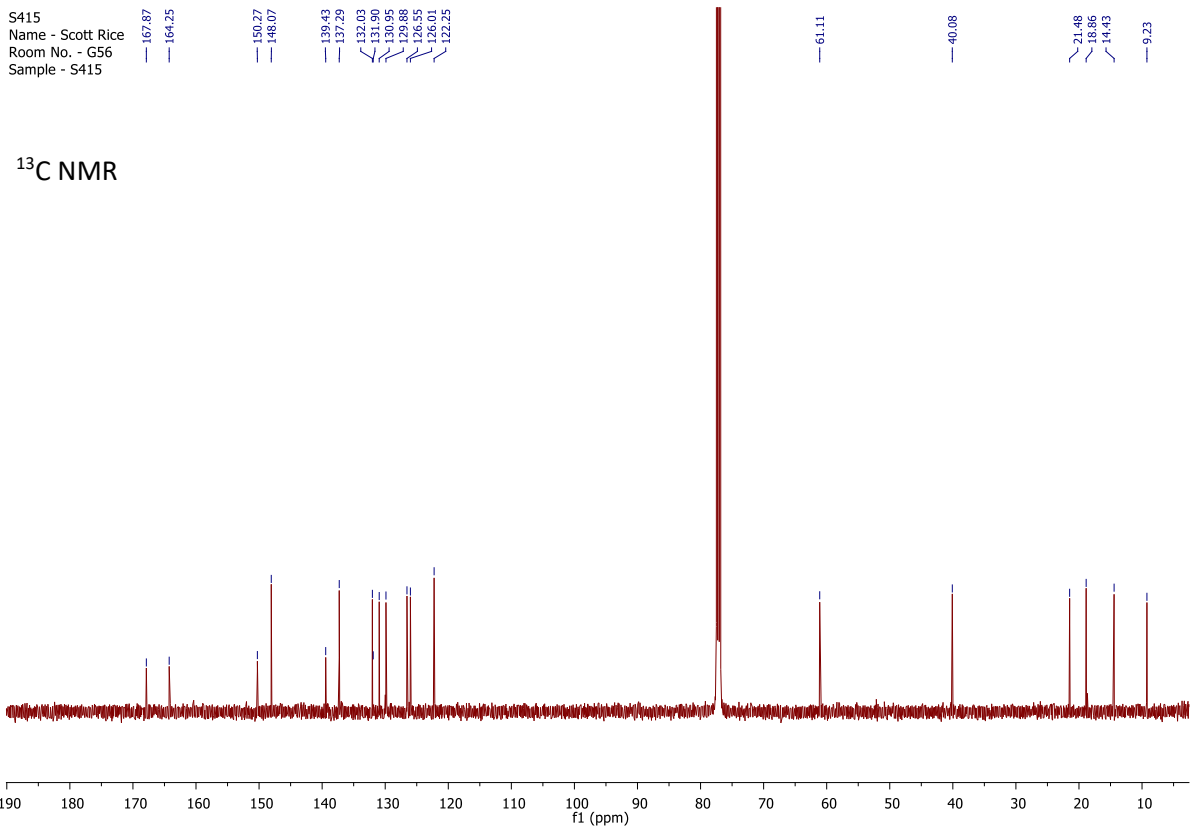

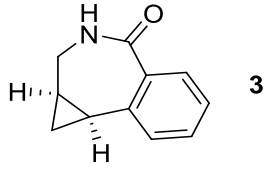

S416b  
Name - Scott Rice  
Room No. - G56  
Sample - S416b

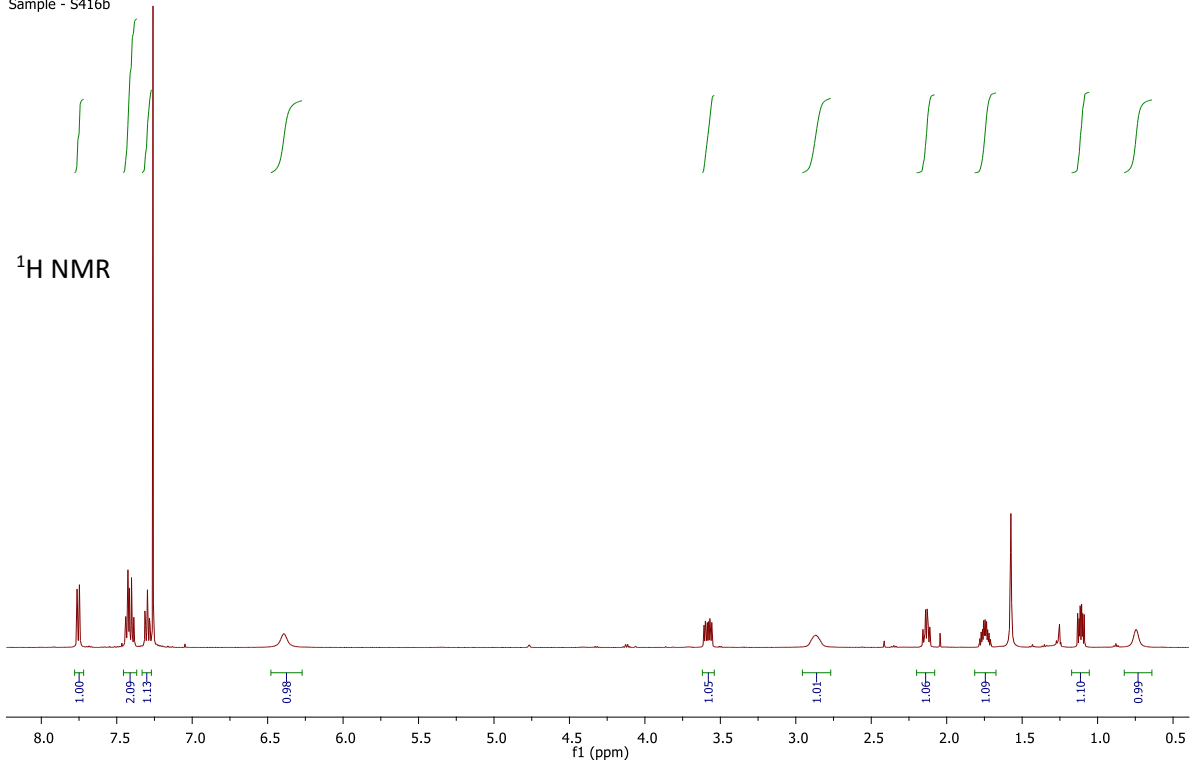

S416b  
Name - Scott Rice  
Room No. - G56  
Sample - S416b

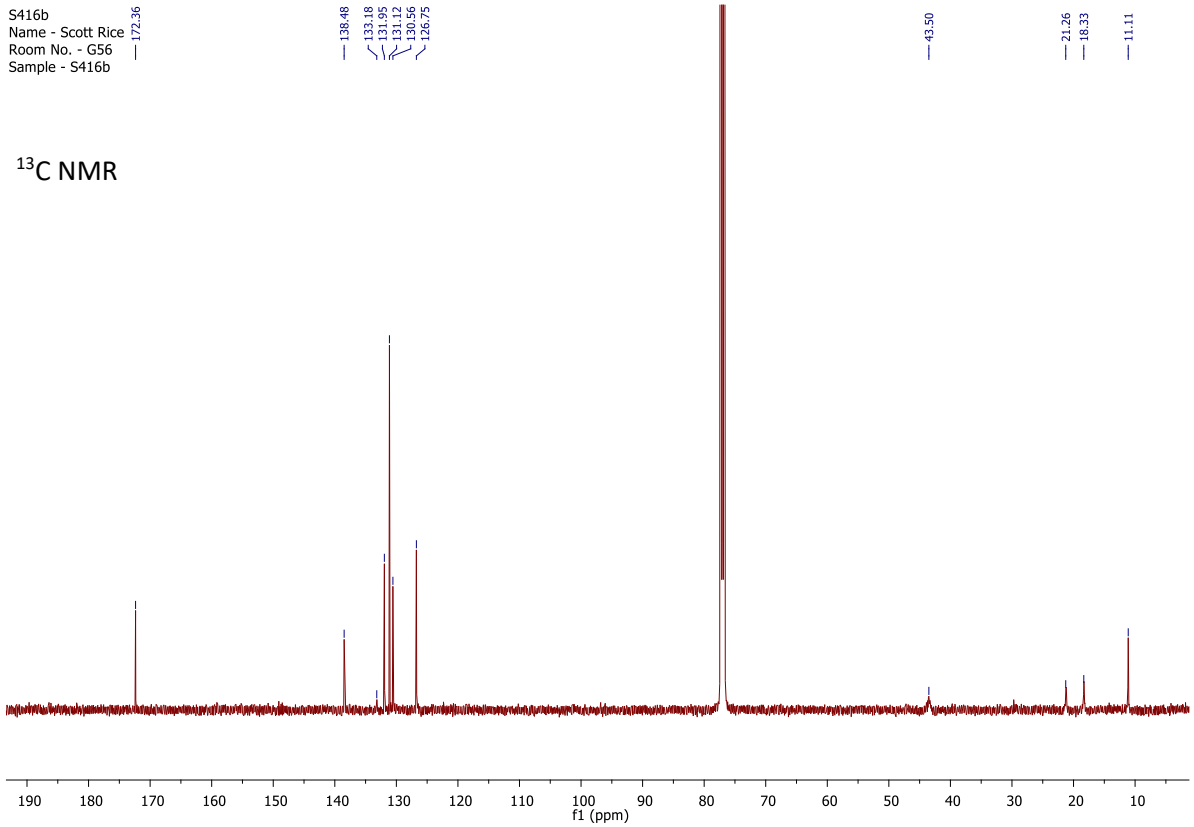

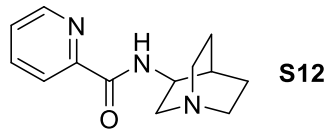

S319p  
Name - Scott Rice  
Room No. - G56  
Sample - S319p

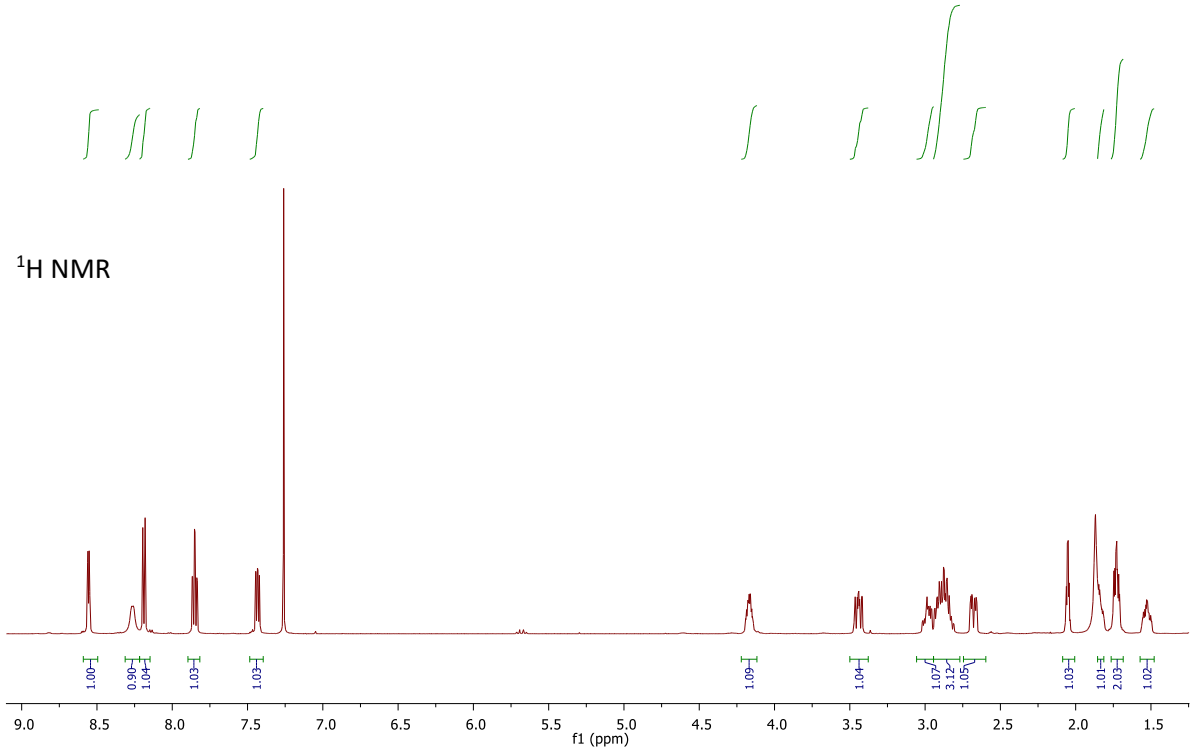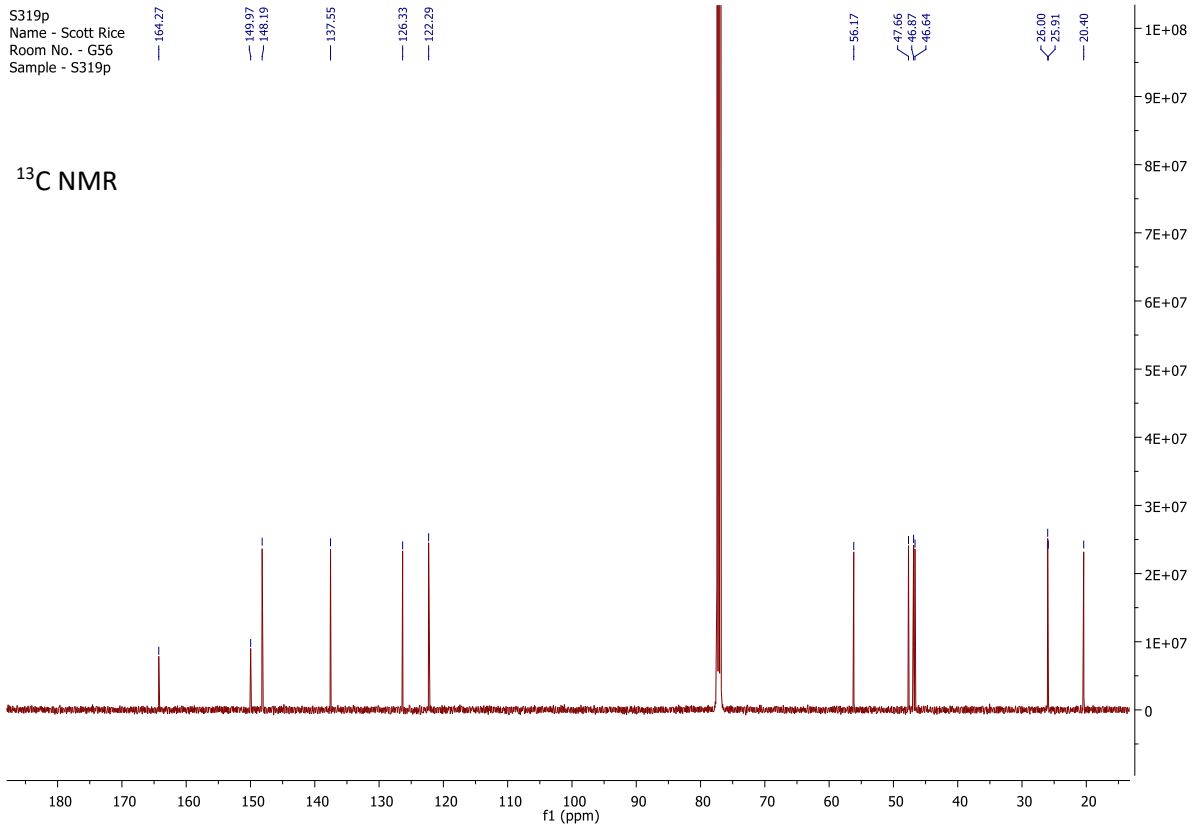

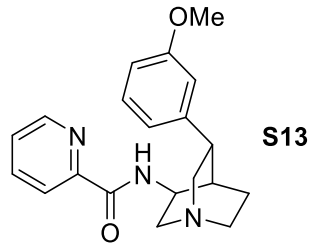

S327  
Name - Scott Rice  
Room No. - G56  
Sample - S327

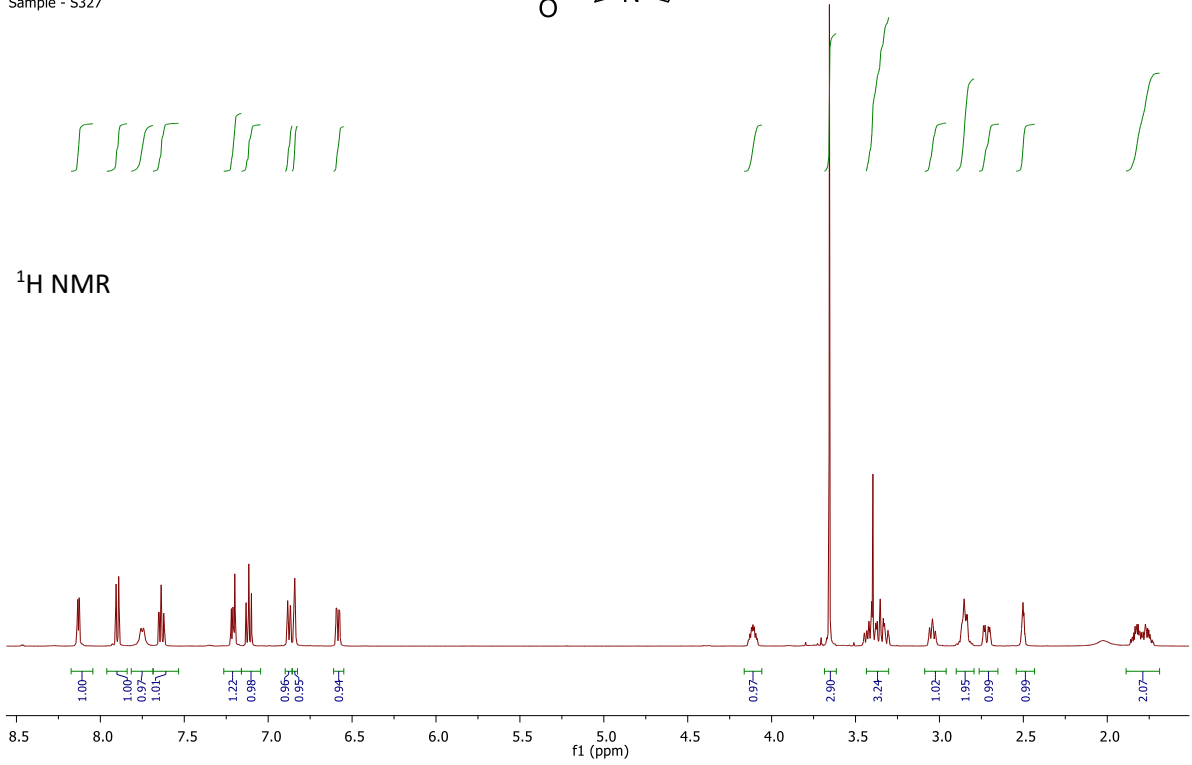

S327  
Name - Scott Rice  
Room No. - G56  
Sample - S327

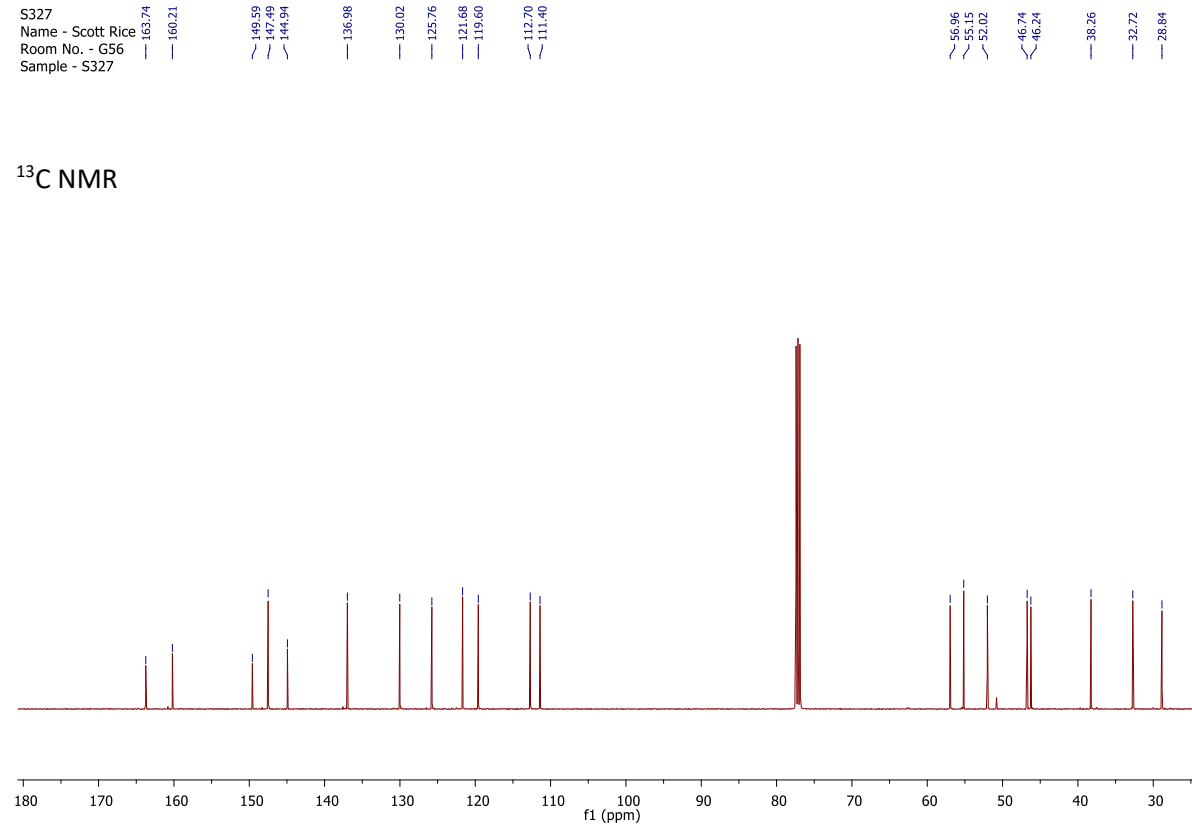

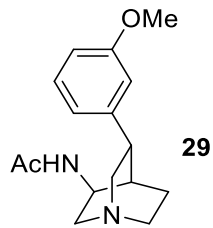

S329  
 Name - Scott Rice  
 Room No. - G56  
 Sample - S329

### <sup>1</sup>H NMR

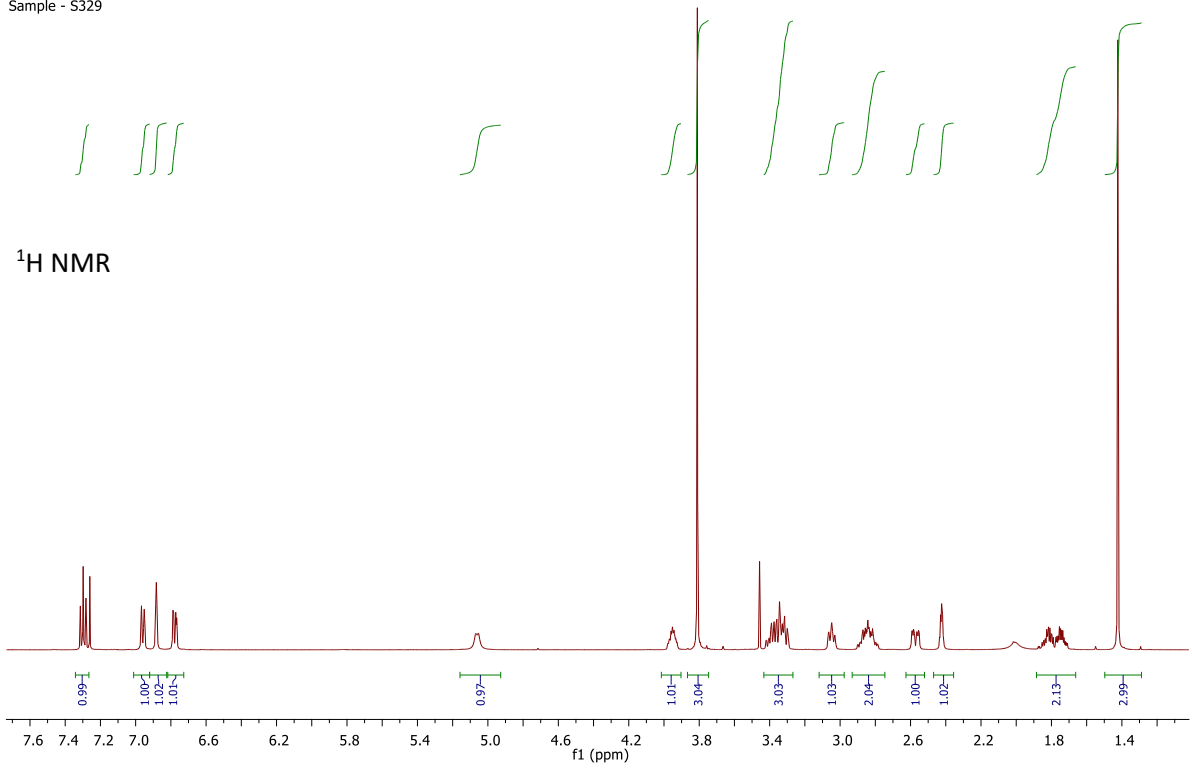

S329  
 Name - Scott Rice  
 Room No. - G56  
 Sample - S329

### <sup>13</sup>C NMR

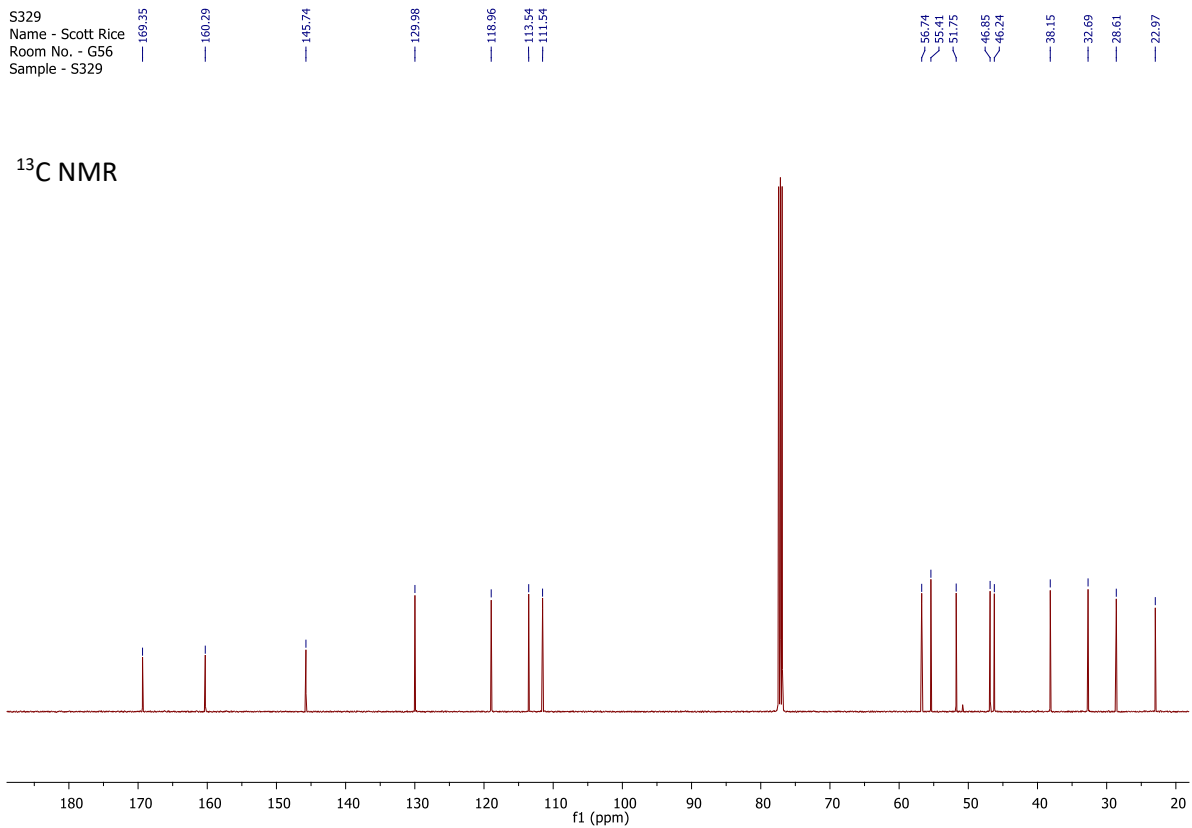

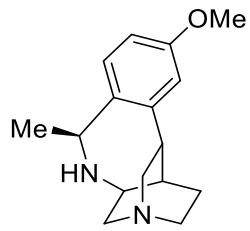**30** (dr 84:16)

S331  
Name - Scott Rice  
Room No. - G56  
Sample - S331

<sup>1</sup>H NMR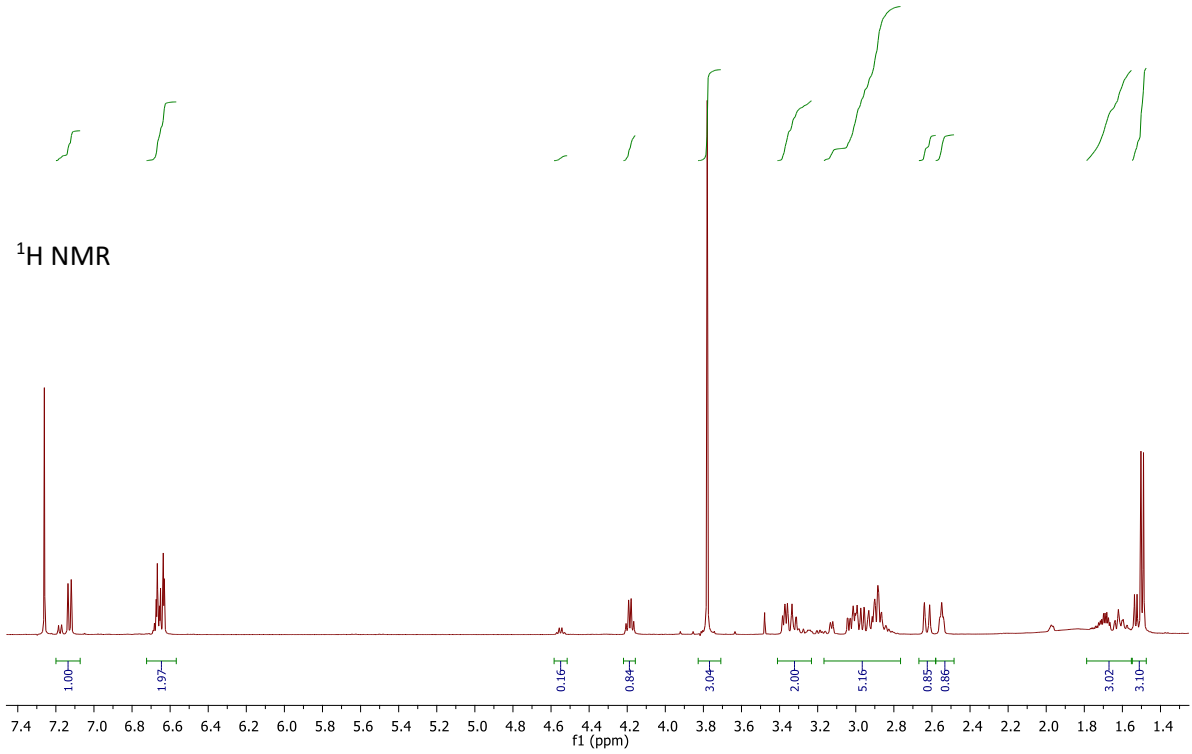

S331  
Name - Scott Rice  
Room No. - G56  
Sample - S331

<sup>13</sup>C NMR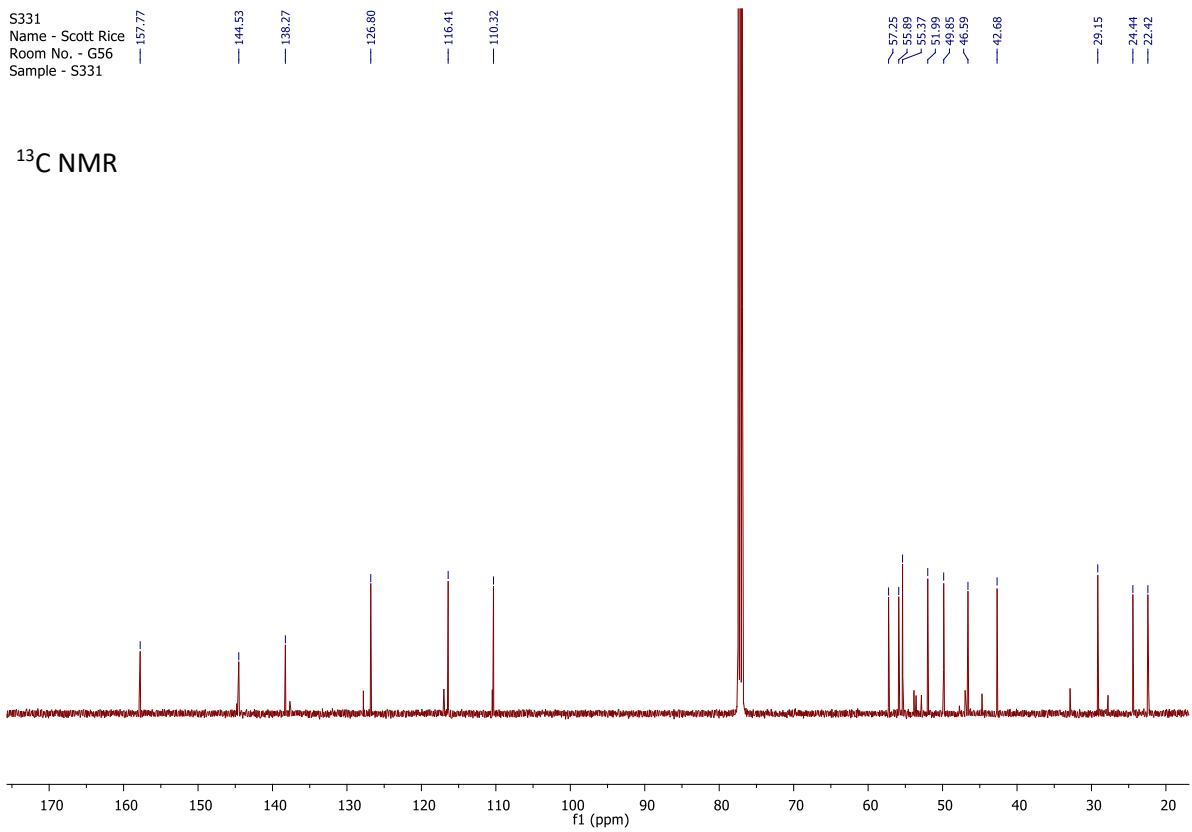

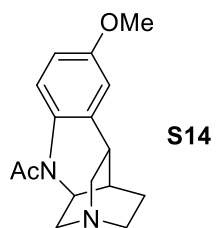

S333  
 Name - Scott Rice  
 Room No. - G56  
 Sample - S333

### <sup>1</sup>H NMR

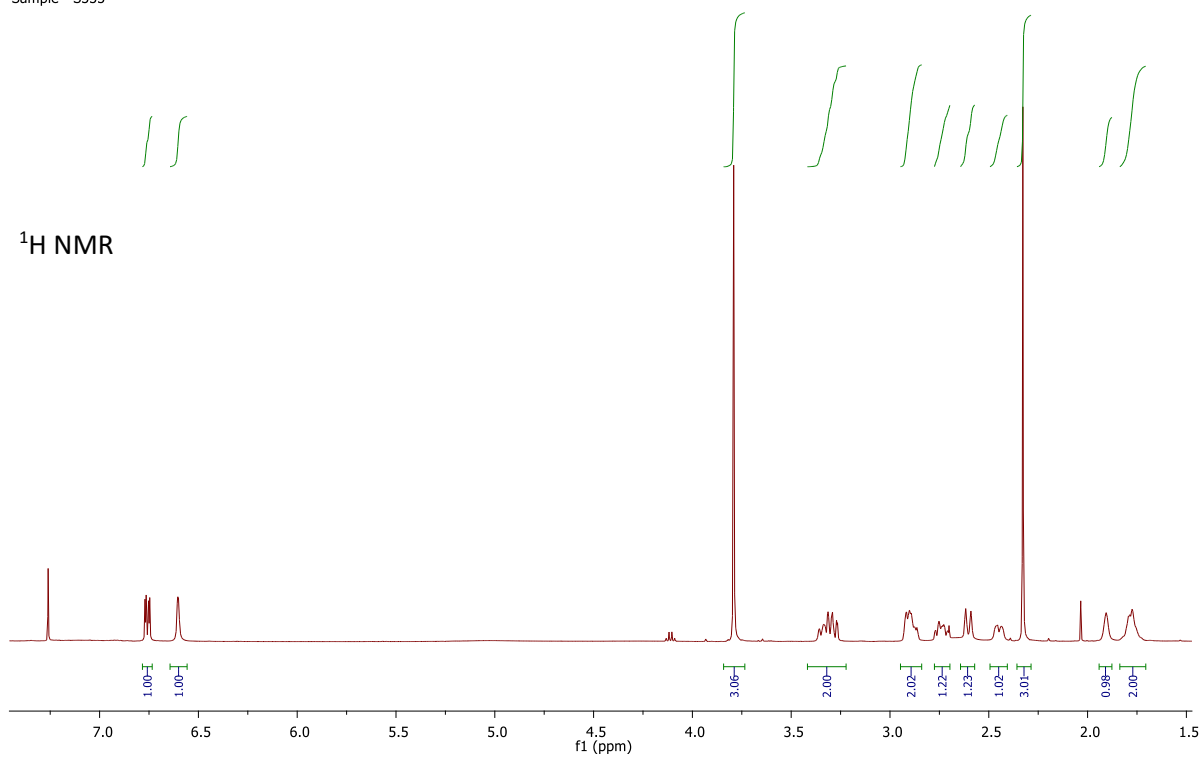

S333  
 Name - Scott Rice  
 Room No. - G56  
 Sample - S333

### <sup>13</sup>C NMR

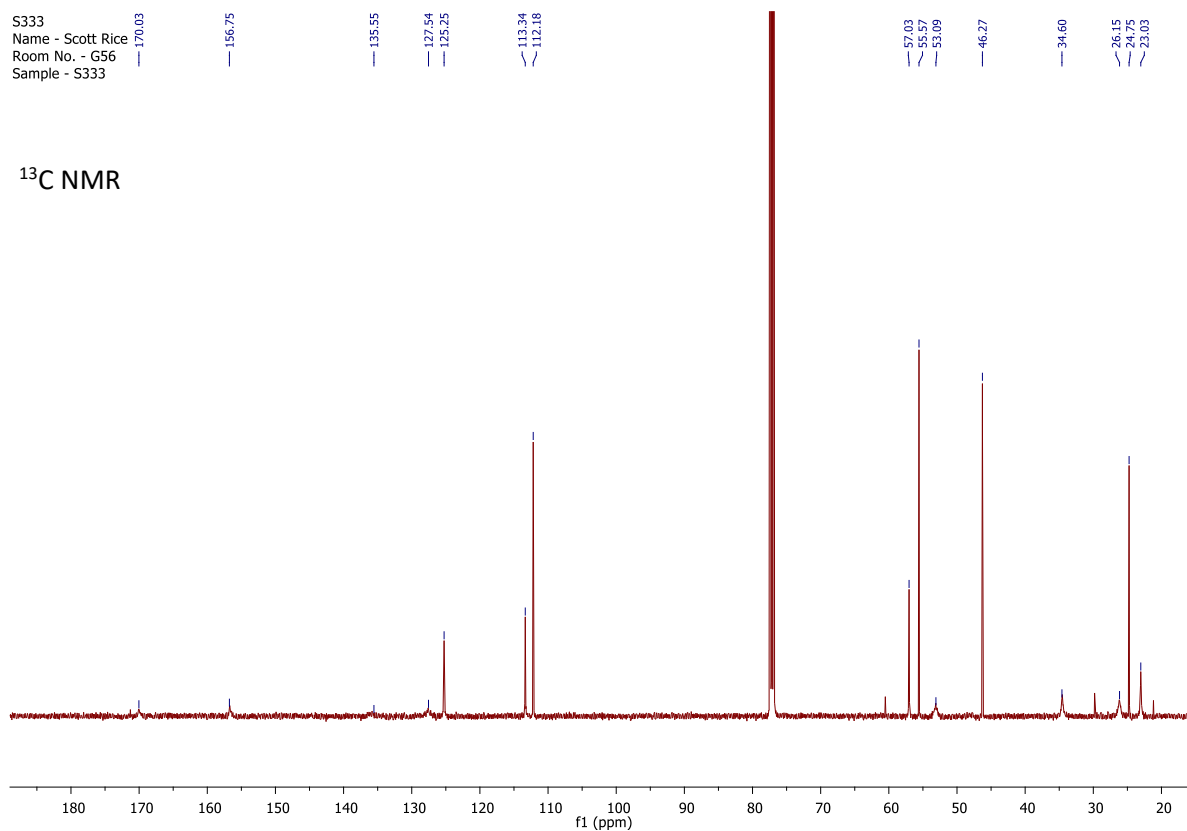

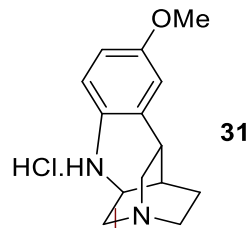

S334c  
 Name - Scott Rice  
 Room No. - G56  
 Sample - S334c

### <sup>1</sup>H NMR

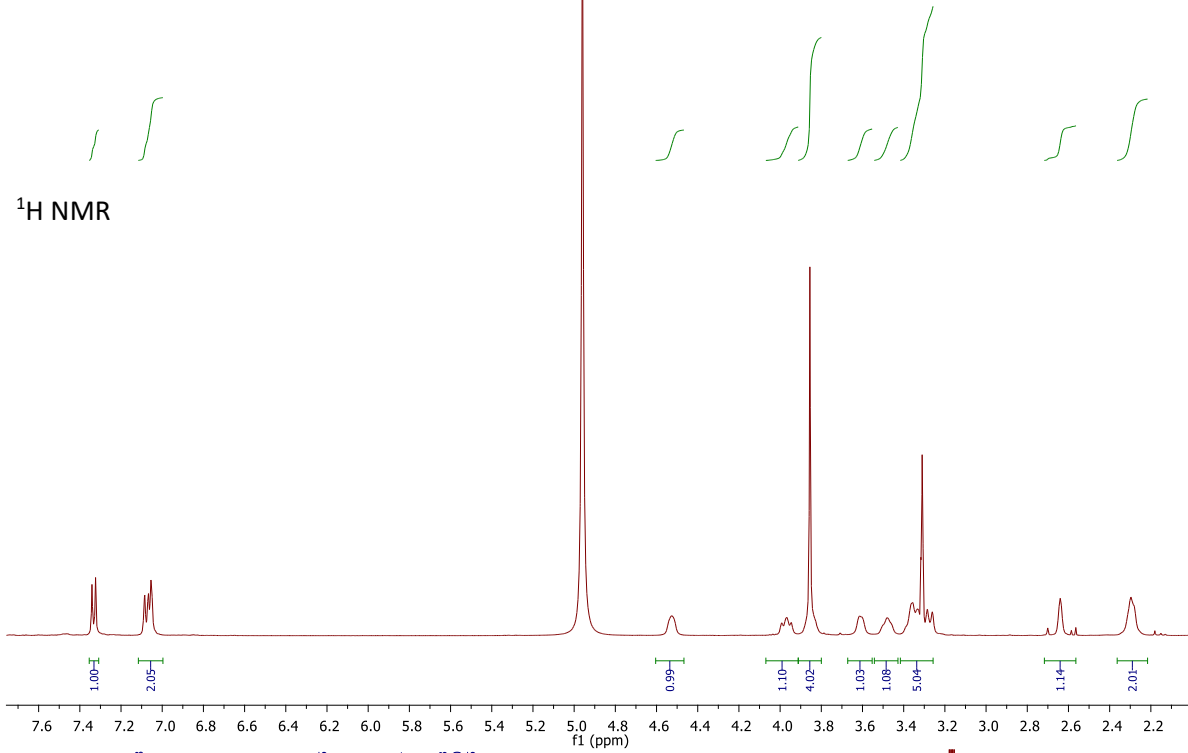

S334c  
 Name - Scott Rice  
 Room No. - G56  
 Sample - S334c

### <sup>13</sup>C NMR

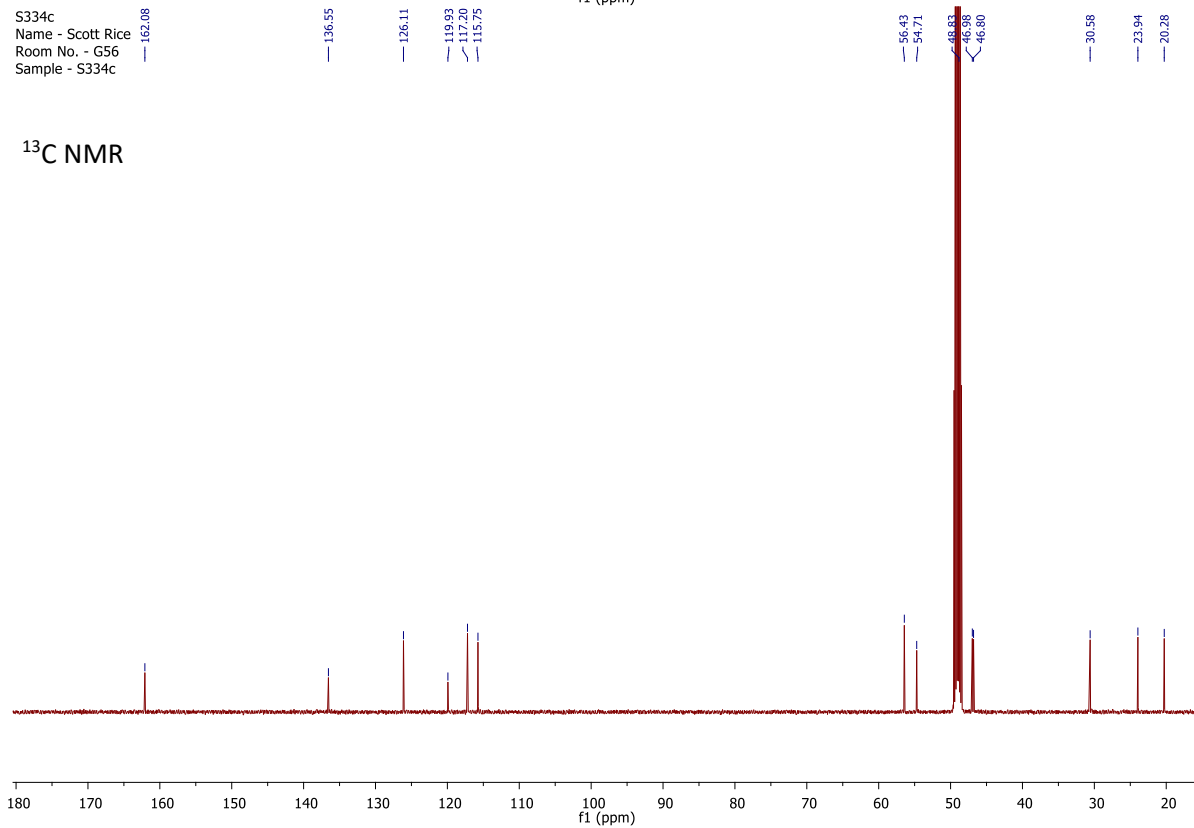



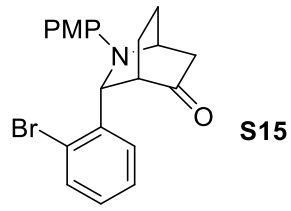

S348  
Name - Scott Rice  
Room No - G56  
Sample S348

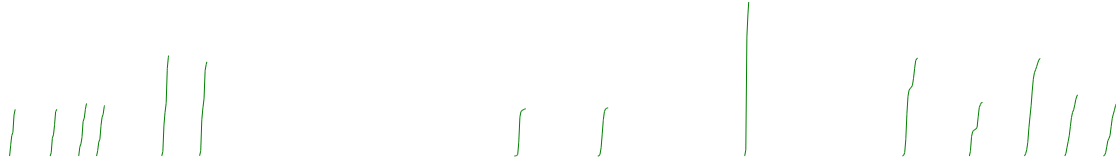**<sup>1</sup>H NMR**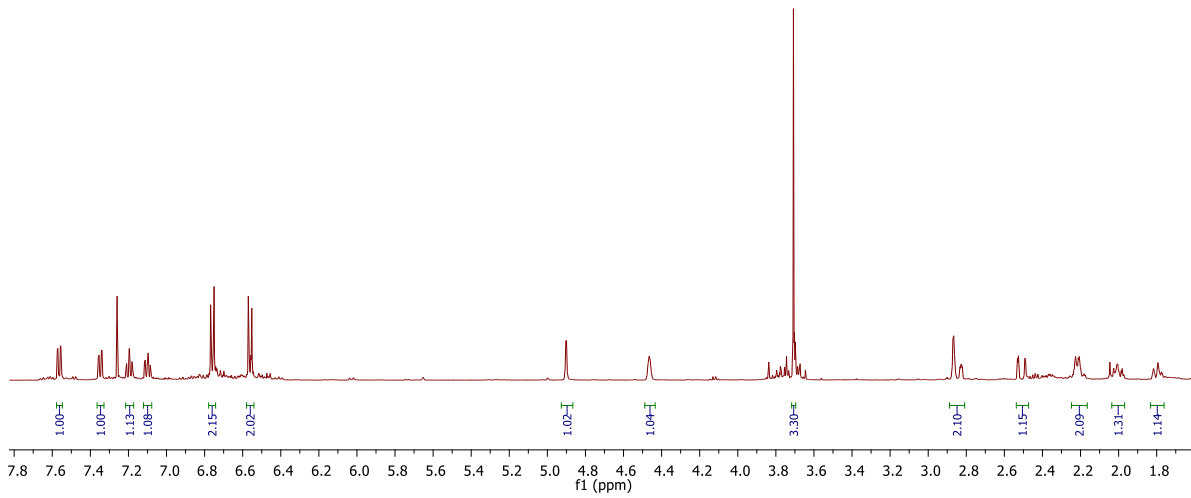

S348  
Name - Scott Rice  
Room No - G56  
Sample S348

**<sup>13</sup>C NMR**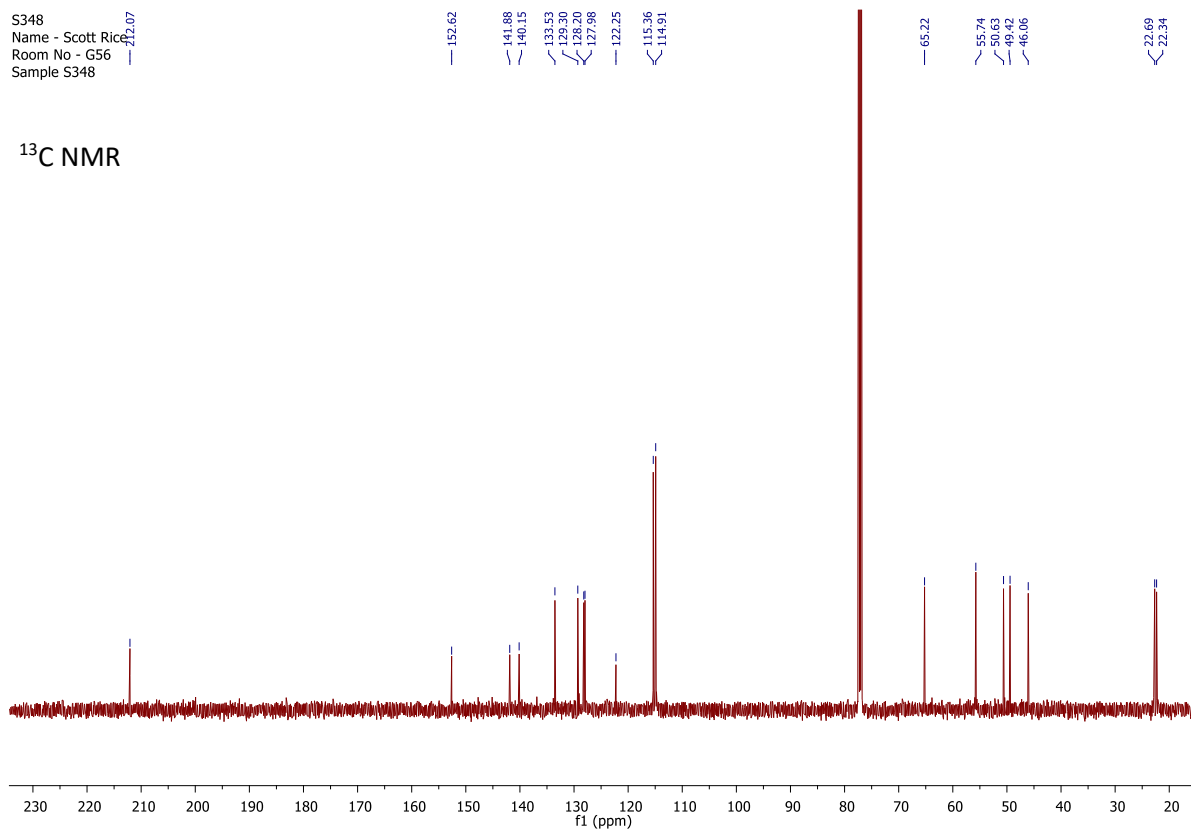

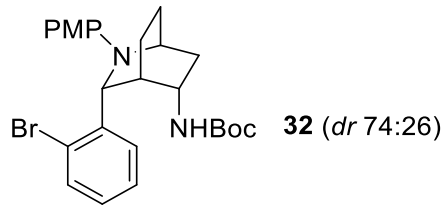

S349  
 Name - Scott Rice  
 Room No. - G56  
 Sample - S349

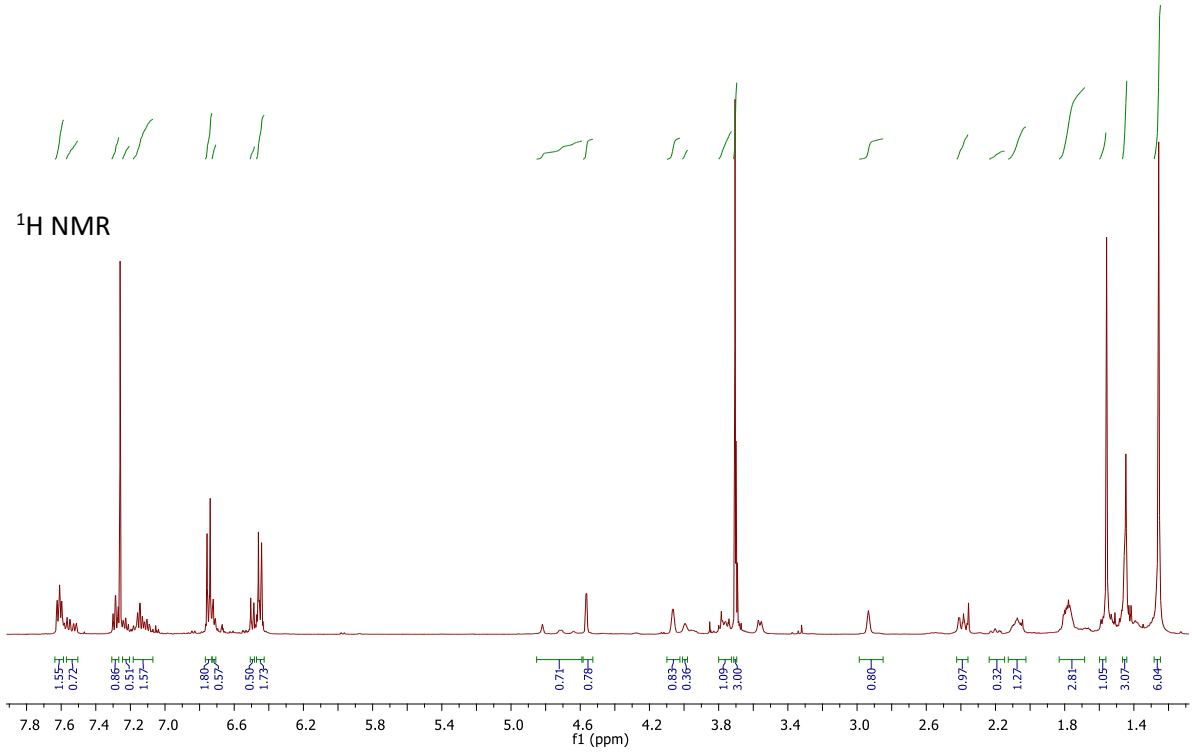

S349  
 Name - Scott Rice  
 Room No. - G56  
 Sample - S349

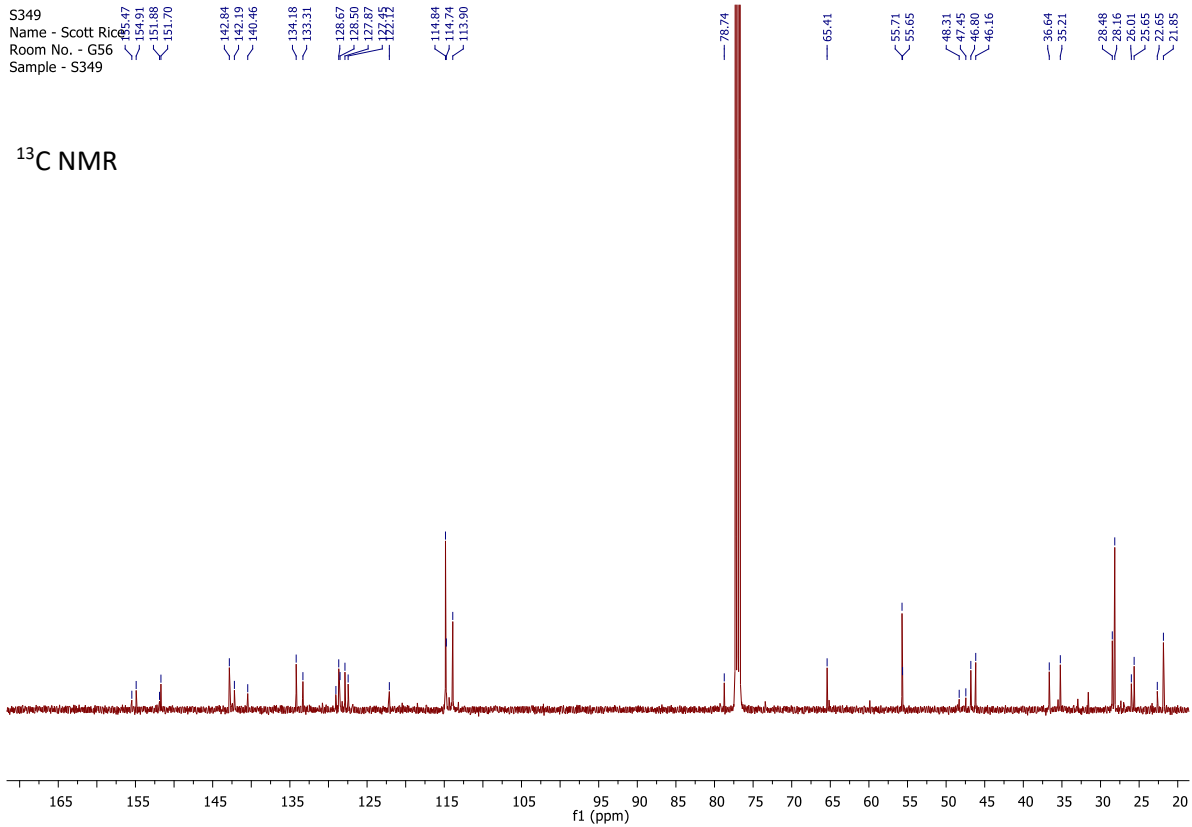

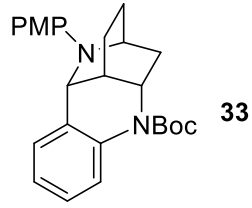

S351  
 Name - Scott Rice  
 Room No. - G56  
 Sample - S351

### <sup>1</sup>H NMR

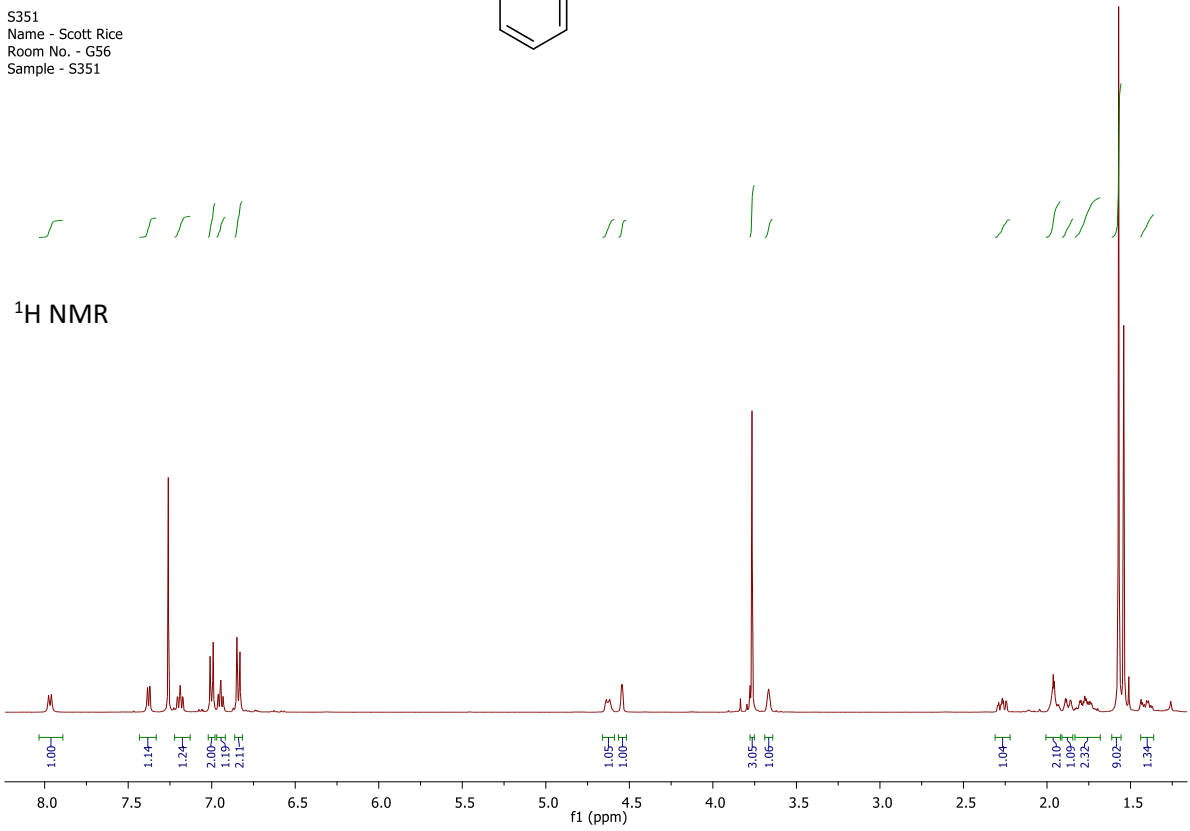

S351  
 Name - Scott Rice  
 Room No. - G56  
 Sample - S351

### <sup>13</sup>C NMR

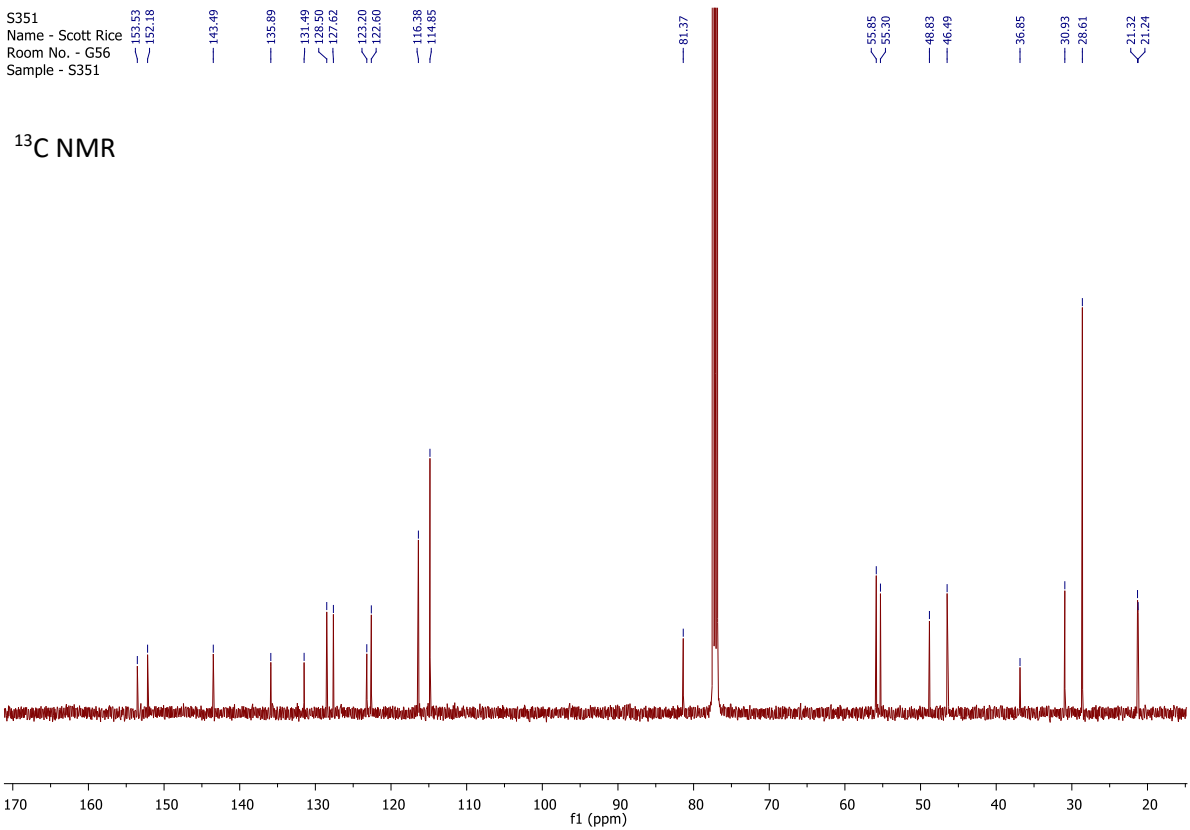

## References

- 1 Y.-Q. Chen, Z. Wang, Y. Wu, S. R. Wisniewski, J. X. Qiao, W. R. Ewing, M. D. Eastgate and J.-Q. Yu, *J. Am. Chem. Soc.*, 2018, **140**, 17884–17894.
- 2 Y. Wu, Y.-Q. Chen, T. Liu, M. D. Eastgate and J.-Q. Yu, *J. Am. Chem. Soc.*, 2016, **138**, 14554–14557.
- 3 C. E. Coomber, L. Benhamou, D.-K. Bučar, P. D. Smith, M. J. Porter and T. D. Sheppard, *J. Org. Chem.*, 2018, **83**, 2495–2503.
- 4 J. Zhao, X.-J. Zhao, P. Cao, J.-K. Liu and B. Wu, *Org. Lett.*, 2017, **19**, 4880–4883.
- 5 D. S. Roman and A. B. Charette, *Org. Lett.*, 2013, **15**, 4394–4397.
- 6 D. H. O’ Donovan, P. Aillard, M. Berger, A. de la Torre, D. Petkova, C. Knittl-Frank, D. Geerdink, M. Kaiser and N. Maulide, *Angew. Chemie Int. Ed.*, 2018, **57**, 10737–10741.
- 7 A. Schuffenhauer, P. Ertl, S. Roggo, S. Wetzel, M. A. Koch and H. Waldmann, *J. Chem. Inf. Model.*, 2007, **47**, 47–58.
- 8 I. Colomer, C. J. Empson, P. Craven, Z. Owen, R. G. Doveston, I. Churcher, S. P. Marsden and A. Nelson, *Chem. Commun.*, 2016, **52**, 7209–7212.
